# Supplementary material
Source: PubMed Central journal article supplement (PMC2587605)
Supplement: 0803713105_ST1_PDF.pdf [file 0803713105_ST1_PDF.pdf]

Table S1

| Name         | Adult<br>Fin | Active<br>Regeneration | Post-<br>regeneration | Fold<br>Change | P-value |
|--------------|--------------|------------------------|-----------------------|----------------|---------|
| APC          | 5.244        | 6.287                  | 0.100                 | 1.199          | 0.546   |
| beta-actin   | 2.906        | 3.067                  | 0.770                 | 1.055          | 0.550   |
| beta-catenin | 1.391        | 6.301                  | 3.086                 | 4.530          | 0.080   |
| Dr18srRNA    | 94.910       | 51.400                 | 0.100                 | -1.846         | 0.347   |
| let7a1long   | 12.340       | 34.680                 | 6.780                 | 2.810          | 0.911   |
| let7a1mm2    | 6.540        | 7.800                  | 6.888                 | 1.193          | 0.753   |
| let7a1mm6    | 6.710        | 8.000                  | 6.812                 | 1.192          | 0.883   |
| let7a1short  | 10.340       | 32.690                 | 4.829                 | 3.162          | 0.901   |
| let-7b       | 5.201        | 4.558                  | 0.270                 | -1.141         | 0.535   |
| let7c        | 10.870       | 8.062                  | 1.386                 | -1.348         | 0.403   |
| let-7d       | 1.459        | 0.100                  | 0.100                 | -14.590        | 0.411   |
| let-7e       | 3.584        | 0.100                  | 0.344                 | -35.840        | 0.037   |
| let7f        | 0.100        | 0.100                  | 0.100                 | 1.000          | 0.423   |
| let-7g       | 0.719        | 0.274                  | 0.463                 | -2.624         | 0.808   |
| mmu-let-7g   | 2.127        | 0.530                  | 0.163                 | -4.013         | 0.193   |
| let-7i       | 0.977        | 0.287                  | 0.211                 | -3.404         | 0.230   |
| lin4         | 1.717        | 0.986                  | 0.855                 | -1.741         | 0.448   |
| Lycopene     | 1.000        | 1.000                  | 1.000                 | 1.000          | 0.423   |
| miR-1        | 0.240        | 0.100                  | 0.926                 | -2.400         | 0.418   |
| miR-100      | 2.767        | 0.100                  | 0.452                 | -27.670        | 0.001   |
| miR-101a     | 0.100        | 0.100                  | 1.444                 | 1.000          | 0.423   |
| miR-29b      | 0.100        | 0.100                  | 0.362                 | 1.000          | 0.423   |
| miR-103      | 2.578        | 2.247                  | 1.640                 | -1.147         | 0.467   |
| miR-104      | 1.126        | 0.100                  | 0.592                 | -11.260        | 0.144   |
| miR-105      | 0.371        | 0.100                  | 1.591                 | -3.710         | 0.183   |
| miR-106      | 6.313        | 13.290                 | 0.822                 | 2.105          | 0.567   |
| miR-107      | 2.493        | 4.992                  | 1.389                 | 2.002          | 0.662   |
| miR-108      | 2.301        | 3.192                  | 0.100                 | 1.387          | 0.601   |
| miR-109      | 4.999        | 8.788                  | 1.517                 | 1.758          | 0.360   |
| miR-10a      | 0.445        | 0.100                  | 0.388                 | -4.450         | 0.258   |
| miR-10b      | 0.570        | 0.100                  | 0.341                 | -5.700         | 0.150   |
| miR-10bshort | 0.722        | 0.297                  | 0.486                 | -2.431         | 0.494   |
| miR-11       | 1.175        | 0.213                  | 0.938                 | -5.516         | 0.196   |
| miR-110      | 1.805        | 5.391                  | 1.640                 | 2.987          | 0.003   |
| miR-19a      | 0.100        | 1.595                  | 1.061                 | 15.950         | 0.423   |
| miR-112      | 0.745        | 0.100                  | 0.481                 | -7.450         | 0.247   |
| miR-113      | 3.501        | 7.172                  | 1.247                 | 2.049          | 0.235   |
| miR-114      | 0.100        | 0.100                  | 0.446                 | 1.000          | 1.000   |
| miR-115      | 0.378        | 0.204                  | 1.333                 | -1.853         | 0.313   |
| miR-116      | 6.307        | 2.148                  | 0.362                 | -2.936         | 0.281   |
| miR-117      | 0.100        | 0.100                  | 1.357                 | 1.000          | 0.423   |
| miR-118      | 0.100        | 0.100                  | 0.311                 | 1.000          | 0.423   |
| miR-119      | 0.301        | 0.460                  | 1.350                 | 1.528          | 0.468   |
| miR-12       | 0.100        | 0.547                  | 0.100                 | 5.470          | 0.624   |
| miR-120      | 1.529        | 0.553                  | 0.616                 | -2.765         | 0.315   |
| miR-121      | 4.411        | 2.595                  | 2.002                 | -1.700         | 0.224   |

|               |       |        |       |         |       |
|---------------|-------|--------|-------|---------|-------|
| miR-122       | 7.386 | 3.129  | 0.204 | -2.360  | 0.328 |
| miR-126*      | 0.100 | 9.952  | 0.871 | 99.520  | 0.024 |
| miR-124ashort | 0.686 | 0.164  | 1.114 | -4.183  | 0.477 |
| miR-124mm2    | 0.888 | 0.215  | 1.000 | -4.130  | 0.399 |
| miR-124mm6    | 0.523 | 0.314  | 1.854 | -1.666  | 0.987 |
| miR-125a      | 0.382 | 1.839  | 1.298 | 4.814   | 0.115 |
| miR-125b      | 3.917 | 4.859  | 1.309 | 1.240   | 0.627 |
| miR-126       | 0.318 | 1.890  | 0.625 | 5.943   | 0.599 |
| miR-127       | 0.846 | 2.884  | 0.757 | 3.409   | 0.137 |
| miR-128b      | 1.022 | 1.163  | 0.457 | 1.138   | 0.648 |
| miR-129a      | 0.987 | 2.476  | 0.680 | 2.509   | 0.313 |
| miR-129       | 3.533 | 0.934  | 0.546 | -3.783  | 0.346 |
| miR-13a       | 0.640 | 0.100  | 0.262 | -6.400  | 0.423 |
| miR-130       | 0.106 | 0.185  | 1.567 | 1.745   | 0.885 |
| miR-130a      | 1.670 | 0.215  | 0.272 | -7.767  | 0.142 |
| miR-130b      | 1.152 | 2.231  | 0.461 | 1.937   | 0.869 |
| miR-9*        | 0.100 | 0.100  | 0.219 | 1.000   | 1.000 |
| miR-132       | 0.179 | 0.357  | 2.096 | 1.994   | 0.766 |
| miR-133a      | 3.673 | 7.528  | 2.268 | 2.050   | 0.276 |
| miR-134       | 0.100 | 0.240  | 1.409 | 2.400   | 0.727 |
| miR-135a      | 0.100 | 0.100  | 0.100 | 1.000   | 0.423 |
| miR-136       | 0.286 | 0.108  | 1.424 | -2.648  | 0.240 |
| miR-137       | 0.322 | 0.100  | 0.340 | -3.220  | 0.100 |
| miR-138       | 1.623 | 2.836  | 0.765 | 1.747   | 0.579 |
| miR-139       | 1.109 | 1.225  | 0.838 | 1.105   | 0.399 |
| miR-14        | 0.100 | 0.100  | 0.100 | 1.000   | 1.000 |
| miR-140*      | 0.645 | 0.600  | 0.550 | -1.075  | 0.274 |
| miR-140       | 0.100 | 11.070 | 0.949 | 110.700 | 0.007 |
| miR-141       | 0.100 | 1.762  | 0.806 | 17.620  | 0.548 |
| miR-142-3p    | 0.100 | 2.111  | 0.864 | 21.110  | 0.420 |
| miR-142-5p    | 0.100 | 0.100  | 0.305 | 1.000   | 1.000 |
| miR-143       | 0.100 | 0.100  | 0.396 | 1.000   | 0.423 |
| miR-144       | 9.954 | 0.100  | 4.107 | -99.540 | 0.004 |
| miR-145       | 3.007 | 1.206  | 1.611 | -2.493  | 0.143 |
| miR-146       | 0.205 | 0.158  | 1.577 | -1.297  | 0.671 |
| miR-147       | 3.284 | 0.281  | 0.525 | -11.687 | 0.102 |
| miR-148a      | 0.100 | 0.191  | 1.668 | 1.910   | 0.739 |
| miR-149       | 0.362 | 2.020  | 1.510 | 5.580   | 0.202 |
| miR-150       | 0.122 | 0.100  | 0.100 | -1.220  | 0.423 |
| miR-151       | 0.148 | 1.270  | 0.769 | 8.581   | 0.114 |
| miR-152       | 0.164 | 9.275  | 1.115 | 56.555  | 0.001 |
| miR-153a      | 0.100 | 0.100  | 0.523 | 1.000   | 1.000 |
| miR-154       | 0.208 | 3.159  | 0.905 | 15.188  | 0.088 |
| miR-155       | 0.100 | 0.100  | 0.324 | 1.000   | 0.423 |
| miR-15a       | 0.100 | 0.100  | 0.100 | 1.000   | 1.000 |
| miR-15b       | 1.022 | 1.789  | 1.804 | 1.750   | 0.614 |
| miR-16        | 5.584 | 0.100  | 0.357 | -55.840 | 0.002 |
| miR-17-3p     | 1.316 | 4.083  | 4.095 | 3.103   | 0.847 |
| miR-18        | 0.100 | 0.100  | 0.100 | 1.000   | 0.423 |

|           |        |        |       |         |       |
|-----------|--------|--------|-------|---------|-------|
| miR-181a  | 6.542  | 17.750 | 1.660 | 2.713   | 0.063 |
| miR-182   | 0.517  | 0.271  | 0.297 | -1.908  | 0.508 |
| miR-183   | 0.100  | 2.146  | 0.874 | 21.460  | 0.654 |
| miR-184   | 5.378  | 0.387  | 0.247 | -13.897 | 0.116 |
| miR-185   | 0.461  | 0.125  | 1.390 | -3.688  | 0.258 |
| miR-186   | 0.284  | 0.684  | 0.672 | 2.408   | 0.674 |
| miR-187   | 0.913  | 0.705  | 1.642 | -1.295  | 0.485 |
| miR-188   | 2.998  | 0.132  | 0.917 | -22.712 | 0.075 |
| miR-189   | 0.100  | 0.563  | 1.894 | 5.630   | 0.505 |
| miR-19    | 0.100  | 0.100  | 0.100 | 1.000   | 1.000 |
| miR-190   | 0.100  | 0.100  | 0.271 | 1.000   | 1.000 |
| miR-191   | 0.742  | 0.319  | 2.082 | -2.326  | 0.586 |
| miR-192   | 0.842  | 1.268  | 0.686 | 1.506   | 0.478 |
| miR-193   | 1.114  | 8.541  | 1.191 | 7.667   | 0.678 |
| miR-194   | 0.370  | 0.135  | 0.207 | -2.741  | 0.528 |
| miR-195   | 0.247  | 0.852  | 0.909 | 3.449   | 0.747 |
| miR-196a  | 0.279  | 0.320  | 0.151 | 1.147   | 0.737 |
| miR-197   | 1.625  | 5.093  | 1.057 | 3.134   | 0.078 |
| miR-198   | 13.120 | 4.868  | 0.208 | -2.695  | 0.330 |
| miR-199*  | 0.100  | 0.100  | 0.100 | 1.000   | 1.000 |
| miR-199   | 6.050  | 16.210 | 1.692 | 2.679   | 0.469 |
| miR-2a    | 6.889  | 0.100  | 3.834 | -68.890 | 0.004 |
| miR-20a   | 3.283  | 3.497  | 0.487 | 1.065   | 0.838 |
| miR-200b  | 0.248  | 5.534  | 0.229 | 22.315  | 0.076 |
| miR-200c  | 1.812  | 0.773  | 1.040 | -2.344  | 0.412 |
| miR-201   | 0.753  | 0.320  | 3.964 | -2.353  | 0.598 |
| miR-202   | 2.145  | 0.100  | 4.698 | -21.450 | 0.003 |
| miR-203   | 7.662  | 0.114  | 6.004 | -67.211 | 0.033 |
| miR-204   | 1.132  | 0.778  | 0.283 | -1.455  | 0.547 |
| miR-205   | 27.780 | 18.450 | 3.929 | -1.506  | 0.577 |
| miR-206   | 17.630 | 6.796  | 0.288 | -2.594  | 0.323 |
| miR-207   | 2.941  | 7.742  | 2.345 | 2.632   | 0.146 |
| miR-208   | 0.155  | 0.230  | 0.888 | 1.484   | 0.600 |
| miR-21    | 0.173  | 0.100  | 0.100 | -1.730  | 0.423 |
| miR-210   | 7.862  | 7.581  | 1.197 | -1.037  | 0.685 |
| miR-211   | 0.824  | 4.758  | 2.504 | 5.774   | 0.120 |
| miR-212   | 0.100  | 0.100  | 0.100 | 1.000   | 1.000 |
| miR-181a* | 0.327  | 6.498  | 2.036 | 19.872  | 0.075 |
| miR-214   | 36.820 | 19.370 | 1.006 | -1.901  | 0.341 |
| miR-215   | 0.753  | 0.162  | 1.100 | -4.648  | 0.703 |
| miR-216   | 3.043  | 0.303  | 0.542 | -10.043 | 0.134 |
| miR-217   | 0.279  | 0.100  | 0.365 | -2.790  | 0.192 |
| miR-218   | 0.428  | 0.248  | 0.581 | -1.726  | 0.579 |
| miR-219   | 0.236  | 0.188  | 0.415 | -1.255  | 0.381 |
| miR-22b   | 0.100  | 0.100  | 0.100 | 1.000   | 1.000 |
| miR-220   | 0.100  | 0.100  | 0.100 | 1.000   | 0.423 |
| miR-221   | 1.354  | 2.874  | 0.918 | 2.123   | 0.088 |
| miR-222   | 4.059  | 2.972  | 0.269 | -1.366  | 0.992 |
| miR-223   | 1.931  | 1.120  | 0.466 | -1.724  | 0.424 |

|              |       |        |       |         |       |
|--------------|-------|--------|-------|---------|-------|
| miR-224      | 0.572 | 0.961  | 0.783 | 1.680   | 0.497 |
| miR-23a      | 0.100 | 0.100  | 0.100 | 1.000   | 1.000 |
| miR-23b      | 0.100 | 0.100  | 0.100 | 1.000   | 1.000 |
| miR-24       | 0.100 | 0.100  | 0.100 | 1.000   | 0.423 |
| miR-25       | 0.711 | 0.282  | 0.919 | -2.521  | 0.297 |
| miR-263b     | 0.447 | 2.365  | 1.753 | 5.291   | 0.679 |
| miR-26ashort | 0.249 | 15.550 | 0.351 | 62.450  | 0.059 |
| miR-26mm2    | 0.341 | 0.456  | 0.111 | 1.337   | 0.980 |
| miR-26mm6    | 0.299 | 0.410  | 0.319 | 1.371   | 0.743 |
| miR-275      | 1.137 | 6.112  | 2.300 | 5.376   | 0.797 |
| miR-276b     | 0.100 | 0.292  | 1.100 | 2.920   | 0.572 |
| miR-277      | 0.100 | 0.262  | 0.526 | 2.620   | 0.342 |
| miR-278      | 0.218 | 0.838  | 1.030 | 3.844   | 0.714 |
| miR-279      | 0.280 | 0.916  | 1.030 | 3.271   | 0.865 |
| miR-27a      | 0.100 | 0.100  | 0.100 | 1.000   | 0.423 |
| miR-27b      | 0.334 | 0.146  | 0.457 | -2.288  | 0.255 |
| miR-28       | 0.100 | 0.100  | 0.100 | 1.000   | 0.423 |
| miR-281      | 0.586 | 0.181  | 0.939 | -3.238  | 0.878 |
| miR-283      | 0.100 | 0.100  | 0.500 | 1.000   | 0.368 |
| miR-285      | 0.172 | 0.190  | 0.874 | 1.105   | 0.793 |
| miR-286      | 0.100 | 0.207  | 0.510 | 2.070   | 0.896 |
| miR-290      | 1.127 | 0.454  | 0.607 | -2.482  | 0.346 |
| miR-291a-3p  | 1.150 | 0.609  | 0.964 | -1.888  | 0.279 |
| miR-291a-5p  | 1.533 | 1.797  | 1.692 | 1.172   | 0.822 |
| miR-292-3p   | 0.851 | 0.183  | 0.585 | -4.650  | 0.552 |
| miR-292-5p   | 1.228 | 0.409  | 0.523 | -3.002  | 0.633 |
| miR-293      | 0.670 | 0.661  | 0.398 | -1.014  | 0.920 |
| miR-294      | 1.003 | 2.100  | 1.275 | 2.094   | 0.775 |
| miR-295      | 0.100 | 0.800  | 0.611 | 8.000   | 0.277 |
| miR-296      | 5.629 | 12.780 | 4.063 | 2.270   | 0.043 |
| miR-297      | 6.247 | 4.494  | 0.764 | -1.390  | 0.461 |
| miR-298      | 1.661 | 2.384  | 1.459 | 1.435   | 0.622 |
| miR-299      | 0.128 | 2.375  | 1.082 | 18.555  | 0.533 |
| miR-29a      | 1.187 | 0.100  | 0.494 | -11.870 | 0.053 |
| miR-29b      | 0.100 | 0.100  | 0.100 | 1.000   | 0.423 |
| miR-29c      | 0.100 | 0.100  | 0.100 | 1.000   | 1.000 |
| miR-3        | 0.100 | 0.100  | 0.100 | 1.000   | 1.000 |
| miR-300      | 0.396 | 1.232  | 1.598 | 3.111   | 0.682 |
| miR-301      | 7.039 | 0.100  | 2.275 | -70.390 | 0.001 |
| miR-302      | 5.727 | 0.100  | 0.499 | -57.270 | 0.423 |
| miR-303      | 0.100 | 0.103  | 0.460 | 1.030   | 0.423 |
| miR-304      | 0.100 | 0.100  | 0.316 | 1.000   | 1.000 |
| miR-305      | 0.227 | 0.169  | 0.588 | -1.343  | 0.652 |
| miR-306      | 0.100 | 0.100  | 0.538 | 1.000   | 0.684 |
| miR-307      | 0.274 | 0.152  | 0.758 | -1.803  | 0.924 |
| miR-308      | 0.498 | 0.100  | 0.588 | -4.980  | 0.423 |
| miR-309      | 0.100 | 0.165  | 0.612 | 1.650   | 0.423 |
| miR-30-as    | 0.190 | 0.100  | 0.563 | -1.900  | 0.883 |
| miR-30a-s    | 0.100 | 0.100  | 0.100 | 1.000   | 1.000 |

|            |       |       |       |         |       |
|------------|-------|-------|-------|---------|-------|
| miR-31     | 0.985 | 1.292 | 2.429 | 1.312   | 0.628 |
| miR-310    | 0.542 | 0.534 | 0.936 | -1.015  | 0.975 |
| miR-311    | 0.190 | 3.328 | 1.903 | 17.516  | 0.521 |
| miR-312    | 0.189 | 1.031 | 1.120 | 5.455   | 0.592 |
| miR-313    | 0.100 | 0.980 | 0.975 | 9.800   | 0.561 |
| miR-314    | 0.100 | 0.884 | 1.301 | 8.840   | 0.423 |
| miR-315    | 0.100 | 0.409 | 0.738 | 4.090   | 0.345 |
| miR-316    | 0.796 | 5.404 | 0.101 | 6.789   | 0.947 |
| miR-317    | 0.177 | 0.156 | 0.564 | -1.135  | 0.831 |
| miR-318    | 0.138 | 0.292 | 0.551 | 2.116   | 0.820 |
| miR-32     | 0.100 | 0.100 | 0.100 | 1.000   | 1.000 |
| miR-320    | 8.126 | 0.100 | 0.219 | -81.260 | 0.012 |
| miR-322    | 0.100 | 0.100 | 0.449 | 1.000   | 0.507 |
| miR-323    | 0.977 | 1.125 | 2.187 | 1.151   | 0.704 |
| miR-324-3p | 0.292 | 0.100 | 0.100 | -2.920  | 0.423 |
| miR-325    | 0.100 | 0.100 | 0.100 | 1.000   | 0.423 |
| miR-326    | 2.627 | 6.242 | 2.394 | 2.376   | 0.806 |
| miR-327    | 3.139 | 1.875 | 1.147 | -1.674  | 0.504 |
| miR-328    | 2.388 | 7.281 | 3.999 | 3.049   | 0.544 |
| miR-329    | 0.416 | 6.249 | 2.598 | 15.022  | 0.805 |
| miR-33     | 0.100 | 0.100 | 0.100 | 1.000   | 1.000 |
| miR-330    | 0.243 | 3.912 | 1.741 | 16.099  | 0.709 |
| miR-331    | 2.709 | 7.067 | 3.062 | 2.609   | 0.449 |
| miR-333    | 2.505 | 2.990 | 0.835 | 1.194   | 0.570 |
| miR-335    | 0.673 | 0.100 | 0.415 | -6.730  | 0.232 |
| miR-336    | 0.193 | 0.436 | 1.324 | 2.259   | 0.635 |
| miR-337    | 0.180 | 0.126 | 0.707 | -1.429  | 0.945 |
| miR-338    | 9.239 | 0.100 | 4.528 | -92.390 | 0.015 |
| miR-339    | 1.618 | 1.604 | 2.222 | -1.009  | 0.954 |
| miR-34     | 0.100 | 0.100 | 0.100 | 1.000   | 1.000 |
| miR-340    | 0.134 | 0.100 | 0.100 | -1.340  | 0.423 |
| miR-341    | 1.154 | 0.877 | 0.534 | -1.316  | 0.324 |
| miR-342    | 0.139 | 0.100 | 0.266 | -1.390  | 0.187 |
| miR-343    | 2.485 | 2.729 | 1.339 | 1.098   | 0.957 |
| miR-344    | 0.100 | 1.572 | 1.518 | 15.720  | 0.258 |
| miR-345    | 2.027 | 2.580 | 1.186 | 1.273   | 0.550 |
| miR-346    | 0.934 | 5.089 | 2.242 | 5.449   | 0.947 |
| miR-347    | 1.142 | 7.857 | 2.006 | 6.880   | 0.160 |
| miR-349    | 0.772 | 4.086 | 2.621 | 5.293   | 0.937 |
| miR-34a    | 1.506 | 0.440 | 0.985 | -3.423  | 0.209 |
| miR-34b    | 0.100 | 0.100 | 0.728 | 1.000   | 0.811 |
| miR-34c    | 0.378 | 0.400 | 0.991 | 1.058   | 0.916 |
| miR-35     | 0.100 | 0.100 | 0.100 | 1.000   | 1.000 |
| miR-350    | 0.178 | 1.134 | 1.126 | 6.371   | 0.707 |
| miR-351    | 0.602 | 1.678 | 1.295 | 2.787   | 0.843 |
| miR-352    | 0.369 | 1.219 | 1.045 | 3.304   | 0.748 |
| miR-36     | 0.100 | 0.100 | 0.100 | 1.000   | 1.000 |
| miR-361    | 0.525 | 0.100 | 1.237 | -5.250  | 0.014 |
| miR-365    | 0.683 | 2.734 | 0.500 | 4.003   | 0.607 |

|            |       |        |       |         |       |
|------------|-------|--------|-------|---------|-------|
| miR-367    | 0.189 | 0.100  | 0.434 | -1.890  | 0.202 |
| miR-368    | 0.100 | 0.100  | 0.100 | 1.000   | 0.662 |
| miR-369    | 0.240 | 0.100  | 0.325 | -2.400  | 0.393 |
| miR-37     | 0.336 | 1.160  | 1.535 | 3.452   | 0.808 |
| miR-370    | 2.687 | 14.340 | 1.770 | 5.337   | 0.358 |
| miR-371    | 3.250 | 1.586  | 1.337 | -2.049  | 0.385 |
| miR-372    | 0.358 | 0.100  | 0.676 | -3.580  | 0.148 |
| miR-373    | 3.946 | 0.100  | 0.602 | -39.460 | 0.002 |
| miR-373*   | 2.570 | 2.531  | 2.125 | -1.015  | 0.853 |
| miR-374    | 0.356 | 0.100  | 0.100 | -3.560  | 0.011 |
| miR-375    | 1.203 | 1.387  | 1.561 | 1.153   | 0.879 |
| miR-376a   | 0.101 | 0.100  | 0.100 | -1.010  | 0.193 |
| miR-376b   | 0.297 | 0.350  | 0.582 | 1.178   | 0.394 |
| miR-377    | 0.529 | 0.100  | 0.651 | -5.290  | 0.117 |
| miR-378    | 2.920 | 12.370 | 1.988 | 4.236   | 0.625 |
| miR-379    | 0.705 | 0.100  | 1.002 | -7.050  | 0.061 |
| miR-38     | 0.100 | 0.100  | 0.100 | 1.000   | 0.423 |
| miR-380-3p | 0.282 | 13.590 | 1.100 | 48.191  | 0.052 |
| miR-380-5p | 0.906 | 0.494  | 1.907 | -1.834  | 0.541 |
| miR-381    | 0.236 | 1.510  | 0.648 | 6.398   | 0.617 |
| miR-382    | 1.458 | 0.771  | 1.636 | -1.891  | 0.390 |
| miR-383    | 0.399 | 7.184  | 0.547 | 18.005  | 0.066 |
| miR-384    | 0.784 | 0.525  | 1.834 | -1.493  | 0.914 |
| miR-39     | 0.100 | 0.100  | 0.100 | 1.000   | 1.000 |
| miR-4      | 2.686 | 0.100  | 0.100 | -26.860 | 0.058 |
| miR-40     | 0.100 | 0.100  | 0.100 | 1.000   | 0.423 |
| miR-409    | 4.249 | 5.134  | 2.261 | 1.208   | 0.461 |
| miR-41     | 0.100 | 0.100  | 0.100 | 1.000   | 1.000 |
| miR-410    | 0.100 | 3.694  | 0.733 | 36.940  | 0.029 |
| miR-411    | 0.967 | 0.100  | 1.401 | -9.670  | 0.183 |
| miR-412    | 0.100 | 1.598  | 2.336 | 15.980  | 0.038 |
| miR-42     | 0.527 | 1.517  | 1.328 | 2.879   | 0.877 |
| miR-425    | 0.787 | 2.688  | 2.064 | 3.416   | 0.279 |
| miR-429    | 0.571 | 0.554  | 1.144 | -1.031  | 0.326 |
| miR-43     | 0.100 | 0.100  | 0.100 | 1.000   | 1.000 |
| miR-430a   | 0.516 | 0.232  | 0.448 | -2.224  | 0.264 |
| miR-430b   | 0.831 | 0.216  | 0.327 | -3.847  | 0.236 |
| miR-430c   | 0.100 | 0.264  | 0.441 | 2.640   | 0.493 |
| miR-44     | 0.100 | 0.100  | 0.100 | 1.000   | 1.000 |
| miR-448    | 0.100 | 0.109  | 1.357 | 1.090   | 0.908 |
| miR-449    | 0.814 | 0.568  | 0.784 | -1.433  | 0.306 |
| miR-450    | 0.142 | 0.500  | 1.425 | 3.521   | 0.839 |
| miR-46     | 0.100 | 0.780  | 0.100 | 7.800   | 0.470 |
| miR-47     | 0.100 | 0.100  | 0.100 | 1.000   | 1.000 |
| miR-48     | 0.100 | 0.100  | 0.100 | 1.000   | 0.423 |
| miR-49     | 2.969 | 0.100  | 0.393 | -29.690 | 0.005 |
| miR-5      | 0.662 | 0.791  | 1.947 | 1.195   | 0.579 |
| miR-50     | 0.100 | 0.100  | 0.100 | 1.000   | 0.423 |
| miR-51     | 0.100 | 0.100  | 0.100 | 1.000   | 0.423 |

|           |       |        |       |         |       |
|-----------|-------|--------|-------|---------|-------|
| miR-52    | 0.727 | 1.427  | 1.566 | 1.963   | 0.997 |
| miR-53    | 0.619 | 0.393  | 1.036 | -1.575  | 0.513 |
| miR-54    | 0.100 | 0.100  | 0.100 | 1.000   | 0.423 |
| miR-55    | 0.100 | 0.100  | 0.100 | 1.000   | 1.000 |
| miR-56*   | 0.100 | 0.100  | 0.100 | 1.000   | 0.423 |
| miR-56    | 0.100 | 0.100  | 0.100 | 1.000   | 1.000 |
| miR-57    | 0.168 | 0.100  | 0.100 | -1.680  | 0.423 |
| miR-58    | 0.100 | 0.100  | 0.100 | 1.000   | 0.423 |
| miR-59    | 0.100 | 0.100  | 0.100 | 1.000   | 0.423 |
| miR-6     | 0.100 | 0.100  | 0.100 | 1.000   | 1.000 |
| miR-60    | 0.100 | 0.100  | 0.100 | 1.000   | 0.423 |
| miR-61    | 0.100 | 0.100  | 0.100 | 1.000   | 1.000 |
| miR-62    | 0.100 | 0.100  | 0.100 | 1.000   | 0.423 |
| miR-63    | 0.795 | 0.255  | 1.706 | -3.118  | 0.495 |
| miR-64    | 0.100 | 0.100  | 0.155 | 1.000   | 1.000 |
| miR-65    | 0.100 | 0.114  | 2.100 | 1.140   | 0.803 |
| miR-66    | 0.100 | 15.460 | 0.100 | 154.600 | 0.001 |
| miR-67    | 0.161 | 0.100  | 0.100 | -1.610  | 0.200 |
| miR-68    | 0.100 | 0.100  | 0.100 | 1.000   | 1.000 |
| miR-69    | 0.100 | 16.960 | 0.100 | 169.600 | 0.000 |
| miR-7a    | 0.100 | 0.100  | 0.100 | 1.000   | 1.000 |
| miR-70    | 0.100 | 0.100  | 0.100 | 1.000   | 0.423 |
| miR-71    | 0.100 | 0.100  | 0.328 | 1.000   | 1.000 |
| miR-72    | 0.540 | 0.100  | 0.325 | -5.400  | 0.178 |
| miR-73    | 0.100 | 0.100  | 0.100 | 1.000   | 0.423 |
| miR-74    | 0.458 | 0.100  | 0.100 | -4.580  | 0.179 |
| miR-75    | 0.540 | 4.694  | 3.775 | 8.693   | 0.910 |
| miR-76    | 0.100 | 0.185  | 0.275 | 1.850   | 0.615 |
| miR-77    | 0.100 | 0.100  | 0.100 | 1.000   | 0.423 |
| miR-78    | 0.350 | 0.100  | 0.100 | -3.500  | 0.423 |
| miR-79    | 0.100 | 0.752  | 2.590 | 7.520   | 0.423 |
| miR-8     | 0.100 | 0.100  | 0.100 | 1.000   | 1.000 |
| miR-80    | 0.100 | 17.290 | 0.372 | 172.900 | 0.000 |
| miR-81    | 0.100 | 0.100  | 0.100 | 1.000   | 0.423 |
| miR-83    | 0.606 | 0.673  | 0.100 | 1.111   | 0.303 |
| miR-84    | 0.149 | 0.100  | 1.029 | -1.490  | 0.184 |
| miR-85    | 0.100 | 0.100  | 0.100 | 1.000   | 0.423 |
| miR-86    | 0.140 | 0.100  | 1.683 | -1.400  | 0.215 |
| miR-87    | 3.869 | 0.896  | 0.177 | -4.318  | 0.186 |
| miR-88    | 2.180 | 2.820  | 1.498 | 1.294   | 0.322 |
| miR-89    | 0.175 | 0.100  | 0.100 | -1.750  | 0.228 |
| miR-9     | 0.100 | 0.100  | 0.100 | 1.000   | 1.000 |
| miR-90    | 2.665 | 4.366  | 2.132 | 1.638   | 0.737 |
| miR-17-5p | 0.100 | 0.100  | 0.100 | 1.000   | 1.000 |
| miR-92    | 3.055 | 5.929  | 1.219 | 1.941   | 0.151 |
| miR-93    | 1.039 | 0.357  | 0.133 | -2.910  | 0.222 |
| miR-94    | 0.763 | 2.038  | 0.675 | 2.671   | 0.737 |
| miR-95    | 0.354 | 0.100  | 0.100 | -3.540  | 0.804 |
| miR-96    | 0.468 | 2.195  | 0.713 | 4.690   | 0.340 |

|               |       |       |       |        |       |
|---------------|-------|-------|-------|--------|-------|
| miR-30a-5p    | 1.118 | 0.748 | 0.387 | -1.495 | 0.292 |
| miR-98        | 1.158 | 5.442 | 1.560 | 4.699  | 0.239 |
| miR-99a       | 3.712 | 1.480 | 0.955 | -2.508 | 0.249 |
| miR-99b       | 1.650 | 3.346 | 2.744 | 2.028  | 0.325 |
| PsA-NAD-dehyd | 0.100 | 0.100 | 0.100 | 1.000  | 1.000 |
