# Supplementary material
Source: PubMed Central journal article supplement (PMC2587605)
Supplement: 0803713105_ST2_PDF.pdf [file 0803713105_ST2_PDF.pdf]

Table S2

## Adult Fin

| F635         |        |        | B635  |              |        | F635   |       |              | B635   |        |       |
|--------------|--------|--------|-------|--------------|--------|--------|-------|--------------|--------|--------|-------|
| Name         | Median | Median | Flags | Name         | Median | Median | Flags | Name         | Median | Median | Flags |
| APC          | 4791   | 1995   | 0     | APC          | 2804   | 1138   | 0     | APC          | 5315   | 1638   | 0     |
| APC          | 5249   | 1996   | 0     | APC          | 2827   | 1123   | 0     | APC          | 5175   | 1611   | 0     |
| beta-actin   | 4211   | 2086   | 0     | beta-actin   | 1573   | 1003   | 0     | beta-actin   | 4283   | 1620   | 0     |
| beta-actin   | 4257   | 2085   | 0     | beta-actin   | 1682   | 1015   | 0     | beta-actin   | 4299   | 1608   | 0     |
| beta-catenin | 3087   | 1930   | 0     | beta-catenin | 1463   | 1017   | 0     | beta-catenin | 3787   | 1562   | 0     |
| beta-catenin | 3019   | 1941   | 0     | beta-catenin | 1410   | 1246   | 0     | beta-catenin | 3629   | 1552   | 0     |
| Dr18srRNA    | 65535  | 1978   | 0     | Dr18srRNA    | 14952  | 984    | 0     | Dr18srRNA    | 37991  | 1506   | 0     |
| Dr18srRNA    | 65535  | 2018   | 0     | Dr18srRNA    | 18674  | 1070   | 0     | Dr18srRNA    | 44441  | 1523   | 0     |
| let7a1long   | 17833  | 1924   | 0     | let7a1long   | 4836   | 986    | 0     | let7a1long   | 16942  | 1516   | 0     |
| let7a1long   | 22481  | 1965   | 0     | let7a1long   | 4666   | 989    | 0     | let7a1long   | 17856  | 1516   | 0     |
| let7a1mm2    | 2842   | 1966   | 0     | let7a1mm2    | 1188   | 978    | 0     | let7a1mm2    | 2524   | 1506   | 0     |
| let7a1mm2    | 2653   | 1959   | 0     | let7a1mm2    | 1137   | 999    | 0     | let7a1mm2    | 2455   | 1540   | 0     |
| let7a1mm6    | 2377   | 2012   | -50   | let7a1mm6    | 1092   | 948    | 0     | let7a1mm6    | 2515   | 1525   | 0     |
| let7a1mm6    | 2593   | 1987   | 0     | let7a1mm6    | 1147   | 987    | 0     | let7a1mm6    | 2227   | 1536   | 0     |
| let7a1short  | 7697   | 2017   | 0     | let7a1short  | 1995   | 965    | 0     | let7a1short  | 8899   | 1481   | 0     |
| let7a1short  | 9338   | 1964   | 0     | let7a1short  | 2196   | 948    | 0     | let7a1short  | 7943   | 1456   | 0     |
| let-7b       | 3720   | 2122   | 0     | let-7b       | 4944   | 914    | 0     | let-7b       | 5701   | 2728   | 0     |
| let-7b       | 3529   | 2122   | 0     | let-7b       | 5271   | 903    | 0     | let-7b       | 4902   | 2724   | 0     |
| let7c        | 5526   | 2116   | 0     | let7c        | 3557   | 906    | 0     | let7c        | 11016  | 2768   | 0     |
| let7c        | 7891   | 2125   | 0     | let7c        | 4230   | 912    | 0     | let7c        | 9933   | 2780   | 0     |
| let-7d       | 2914   | 2082   | 0     | let-7d       | 926    | 914    | -50   | let-7d       | 5657   | 2743   | 0     |
| let-7d       | 2384   | 2124   | 0     | let-7d       | 924    | 929    | -50   | let-7d       | 4312   | 2534   | 0     |
| let-7e       | 4613   | 2137   | 0     | let-7e       | 1497   | 923    | 0     | let-7e       | 5332   | 2613   | 0     |
| let-7e       | 5075   | 2129   | 0     | let-7e       | 1571   | 940    | 0     | let-7e       | 5831   | 2614   | 0     |
| let7f        | 2825   | 2097   | 0     | let7f        | 917    | 955    | -50   | let7f        | 2589   | 2594   | -50   |
| let7f        | 2334   | 2183   | -50   | let7f        | 962    | 985    | -50   | let7f        | 3114   | 2473   | 0     |
| let-7g       | 3388   | 2190   | 0     | let-7g       | 1286   | 989    | 0     | let-7g       | 3654   | 2485   | 0     |
| let-7g       | 3670   | 2250   | 0     | let-7g       | 1284   | 1002   | 0     | let-7g       | 3492   | 2419   | 0     |
| mmu-let-7g   | 4036   | 2358   | 0     | mmu-let-7g   | 1426   | 999    | 0     | mmu-let-7g   | 4630   | 2384   | 0     |
| mmu-let-7g   | 3709   | 2165   | 0     | mmu-let-7g   | 1493   | 1003   | 0     | mmu-let-7g   | 4941   | 2362   | 0     |
| let-7i       | 3714   | 2115   | 0     | let-7i       | 1163   | 1070   | 0     | let-7i       | 3835   | 2549   | 0     |
| let-7i       | 3546   | 2104   | 0     | let-7i       | 1190   | 1021   | 0     | let-7i       | 4247   | 2710   | 0     |
| lin4         | 4005   | 2112   | 0     | lin4         | 1081   | 1010   | 0     | lin4         | 4385   | 2559   | 0     |
| lin4         | 4148   | 2099   | 0     | lin4         | 1135   | 1010   | 0     | lin4         | 4540   | 2552   | 0     |
| Lycopene     | 3028   | 1952   | 0     | Lycopene     | 1365   | 994    | 0     | Lycopene     | 2701   | 1541   | 0     |
| Lycopene     | 3202   | 1953   | 0     | Lycopene     | 1445   | 1016   | 0     | Lycopene     | 3429   | 1532   | 0     |
| miR-1        | 3024   | 2067   | 0     | miR-1        | 1069   | 1022   | 0     | miR-1        | 3553   | 2467   | -50   |
| miR-1        | 2972   | 2109   | 0     | miR-1        | 1063   | 1014   | 0     | miR-1        | 3210   | 2392   | 0     |
| miR-100      | 3747   | 1820   | 0     | miR-100      | 1611   | 928    | 0     | miR-100      | 3638   | 1403   | 0     |
| miR-100      | 4183   | 1842   | 0     | miR-100      | 1777   | 918    | 0     | miR-100      | 3901   | 1401   | 0     |
| miR-101a     | 2532   | 1809   | 0     | miR-101a     | 892    | 950    | -50   | miR-101a     | 2322   | 1447   | 0     |
| miR-101a     | 2439   | 1865   | -50   | miR-101a     | 919    | 941    | -50   | miR-101a     | 2227   | 1444   | 0     |
| miR-29b      | 2651   | 1908   | 0     | miR-29b      | 975    | 956    | -50   | miR-29b      | 2357   | 1428   | 0     |

|               |      |      |     |               |      |      |     |               |      |      |     |
|---------------|------|------|-----|---------------|------|------|-----|---------------|------|------|-----|
| miR-29b       | 2700 | 1889 | 0   | miR-29b       | 947  | 979  | -50 | miR-29b       | 2406 | 1459 | 0   |
| miR-103       | 3723 | 1928 | 0   | miR-103       | 1977 | 989  | 0   | miR-103       | 3253 | 1459 | 0   |
| miR-103       | 3787 | 1889 | 0   | miR-103       | 2541 | 969  | 0   | miR-103       | 3498 | 1467 | 0   |
| miR-21        | 3145 | 1892 | 0   | miR-21        | 1066 | 989  | -50 | miR-21        | 3063 | 1468 | 0   |
| miR-21        | 3073 | 1938 | 0   | miR-21        | 1001 | 1003 | -50 | miR-21        | 3056 | 1471 | 0   |
| miR-105       | 2855 | 1973 | 0   | miR-105       | 997  | 993  | -50 | miR-105       | 2734 | 1498 | 0   |
| miR-105       | 2868 | 1955 | 0   | miR-105       | 965  | 1014 | -50 | miR-105       | 2792 | 1497 | 0   |
| miR-106       | 4633 | 1740 | 0   | miR-106       | 2363 | 911  | 0   | miR-106       | 5617 | 1412 | 0   |
| miR-106       | 5148 | 1745 | 0   | miR-106       | 2687 | 878  | 0   | miR-106       | 6942 | 1405 | 0   |
| miR-107       | 3511 | 1755 | 0   | miR-107       | 1808 | 862  | 0   | miR-107       | 3400 | 1396 | 0   |
| miR-107       | 3685 | 1738 | 0   | miR-107       | 1975 | 871  | 0   | miR-107       | 3511 | 1401 | 0   |
| miR-108       | 3881 | 1762 | 0   | miR-108       | 2074 | 886  | 0   | miR-108       | 3042 | 1394 | 0   |
| miR-108       | 3378 | 1738 | 0   | miR-108       | 1958 | 929  | 0   | miR-108       | 3176 | 1406 | 0   |
| miR-109       | 4151 | 1722 | 0   | miR-109       | 2472 | 923  | 0   | miR-109       | 5256 | 1402 | 0   |
| miR-109       | 4302 | 1748 | 0   | miR-109       | 2500 | 930  | 0   | miR-109       | 5493 | 1393 | 0   |
| miR-10a       | 3481 | 2566 | -50 | miR-10a       | 1003 | 1004 | -50 | miR-10a       | 3709 | 2528 | 0   |
| miR-10a       | 3363 | 2194 | 0   | miR-10a       | 1051 | 1029 | -50 | miR-10a       | 3665 | 2463 | 0   |
| miR-10b       | 3268 | 2147 | 0   | miR-10b       | 1064 | 1039 | 0   | miR-10b       | 3179 | 2508 | -50 |
| miR-10b       | 3288 | 2126 | 0   | miR-10b       | 1052 | 1017 | 0   | miR-10b       | 4037 | 2639 | 0   |
| miR-10b-long  | 3166 | 2023 | 0   | miR-10b-long  | 1167 | 980  | 0   | miR-10b-long  | 3086 | 1510 | 0   |
| miR-10b-long  | 3093 | 2014 | 0   | miR-10b-long  | 1301 | 943  | 0   | miR-10b-long  | 3106 | 1539 | 0   |
| miR-10b-mm2   | 2795 | 1936 | 0   | miR-10b-mm2   | 1073 | 972  | 0   | miR-10b-mm2   | 2452 | 1476 | 0   |
| miR-10b-mm2   | 2785 | 1953 | 0   | miR-10b-mm2   | 1077 | 971  | 0   | miR-10b-mm2   | 2614 | 1514 | 0   |
| miR-10b-mm6   | 3159 | 1992 | 0   | miR-10b-mm6   | 1111 | 995  | 0   | miR-10b-mm6   | 2765 | 1530 | 0   |
| miR-10b-mm6   | 3252 | 2043 | 0   | miR-10b-mm6   | 1183 | 1035 | 0   | miR-10b-mm6   | 2734 | 1565 | 0   |
| miR-10b-short | 3095 | 1991 | 0   | miR-10b-short | 1167 | 997  | 0   | miR-10b-short | 2827 | 1534 | 0   |
| miR-10b-short | 3105 | 1948 | 0   | miR-10b-short | 1775 | 1061 | 0   | miR-10b-short | 2586 | 1529 | 0   |
| miR-11        | 3986 | 2130 | 0   | miR-11        | 1083 | 1028 | 0   | miR-11        | 3964 | 2568 | 0   |
| miR-11        | 3814 | 2122 | 0   | miR-11        | 1173 | 1048 | 0   | miR-11        | 4015 | 2525 | 0   |
| miR-110       | 3271 | 1773 | 0   | miR-110       | 1485 | 912  | 0   | miR-110       | 3379 | 1416 | 0   |
| miR-110       | 3450 | 1814 | 0   | miR-110       | 1489 | 934  | 0   | miR-110       | 3347 | 1403 | 0   |
| miR-19a       | 2352 | 1818 | -50 | miR-19a       | 891  | 935  | -50 | miR-19a       | 2242 | 1414 | 0   |
| miR-19a       | 2390 | 1814 | 0   | miR-19a       | 930  | 943  | -50 | miR-19a       | 2251 | 1417 | 0   |
| miR-112       | 2777 | 1803 | 0   | miR-112       | 928  | 930  | -50 | miR-112       | 2638 | 1412 | 0   |
| miR-112       | 2952 | 1839 | 0   | miR-112       | 937  | 925  | -50 | miR-112       | 3061 | 1432 | 0   |
| miR-113       | 3507 | 1855 | 0   | miR-113       | 1547 | 942  | 0   | miR-113       | 5007 | 1420 | 0   |
| miR-113       | 3880 | 1867 | 0   | miR-113       | 1616 | 941  | 0   | miR-113       | 5268 | 1442 | 0   |
| miR-114       | 2527 | 1854 | 0   | miR-114       | 893  | 959  | -50 | miR-114       | 2334 | 1448 | 0   |
| miR-114       | 2625 | 1887 | 0   | miR-114       | 959  | 968  | -50 | miR-114       | 2342 | 1496 | 0   |
| miR-115       | 2826 | 1903 | 0   | miR-115       | 1136 | 969  | -50 | miR-115       | 2619 | 1505 | 0   |
| miR-115       | 2917 | 1909 | 0   | miR-115       | 1134 | 974  | -50 | miR-115       | 2775 | 1482 | 0   |
| miR-116       | 5493 | 1909 | 0   | miR-116       | 4769 | 991  | 0   | miR-116       | 4421 | 1470 | 0   |
| miR-116       | 5200 | 1933 | 0   | miR-116       | 3769 | 985  | 0   | miR-116       | 4378 | 1458 | 0   |
| miR-117       | 2688 | 2013 | 0   | miR-117       | 959  | 991  | -50 | miR-117       | 2513 | 1508 | 0   |
| miR-117       | 2697 | 1980 | 0   | miR-117       | 954  | 1022 | -50 | miR-117       | 2477 | 1502 | 0   |

|               |      |      |     |               |      |      |     |               |      |      |     |
|---------------|------|------|-----|---------------|------|------|-----|---------------|------|------|-----|
| miR-118       | 2278 | 1742 | 0   | miR-118       | 873  | 886  | -50 | miR-118       | 2251 | 1435 | 0   |
| miR-118       | 2243 | 1774 | -50 | miR-118       | 861  | 889  | -50 | miR-118       | 2210 | 1439 | 0   |
| miR-119       | 2759 | 1778 | 0   | miR-119       | 919  | 893  | -50 | miR-119       | 2588 | 1432 | 0   |
| miR-119       | 2531 | 1752 | 0   | miR-119       | 945  | 921  | -50 | miR-119       | 2730 | 1436 | 0   |
| miR-12        | 2019 | 2109 | -50 | miR-12        | 1043 | 1048 | -50 | miR-12        | 2446 | 2417 | 0   |
| miR-12        | 2069 | 2072 | -50 | miR-12        | 1104 | 1024 | -50 | miR-12        | 2268 | 2473 | -50 |
| miR-120       | 3411 | 1773 | 0   | miR-120       | 1314 | 928  | 0   | miR-120       | 3188 | 1456 | 0   |
| miR-120       | 3220 | 1790 | 0   | miR-120       | 1338 | 923  | 0   | miR-120       | 3323 | 1435 | 0   |
| miR-121       | 4122 | 1782 | 0   | miR-121       | 2430 | 926  | 0   | miR-121       | 4647 | 1462 | 0   |
| miR-121       | 4397 | 1784 | 0   | miR-121       | 2663 | 962  | 0   | miR-121       | 4678 | 1418 | 0   |
| miR-122       | 4275 | 1770 | 0   | miR-122       | 2287 | 967  | 0   | miR-122       | 7331 | 1427 | 0   |
| miR-122       | 5249 | 1848 | 0   | miR-122       | 2507 | 976  | 0   | miR-122       | 8739 | 1451 | 0   |
| miR-126*      | 2283 | 1821 | -50 | miR-126*      | 978  | 953  | -50 | miR-126*      | 2491 | 1460 | 0   |
| miR-126*      | 2615 | 1793 | 0   | miR-126*      | 923  | 954  | -50 | miR-126*      | 2568 | 1465 | 0   |
| miR-124along  | 2929 | 1943 | 0   | miR-124along  | 4954 | 1956 | -50 | miR-124along  | 2459 | 1551 | 0   |
| miR-124along  | 3289 | 1995 | 0   | miR-124along  | 1891 | 1610 | -50 | miR-124along  | 2639 | 1552 | 0   |
| miR-124ashort | 3151 | 2070 | 0   | miR-124ashort | 1182 | 1004 | -50 | miR-124ashort | 2491 | 1572 | 0   |
| miR-124ashort | 3464 | 2033 | 0   | miR-124ashort | 1316 | 993  | 0   | miR-124ashort | 2723 | 1554 | 0   |
| miR-124mm2    | 3357 | 2032 | 0   | miR-124mm2    | 1202 | 975  | -50 | miR-124mm2    | 2462 | 1513 | 0   |
| miR-124mm2    | 2955 | 2008 | 0   | miR-124mm2    | 1129 | 1002 | -50 | miR-124mm2    | 2310 | 1531 | 0   |
| miR-124mm6    | 2817 | 1969 | 0   | miR-124mm6    | 1465 | 990  | 0   | miR-124mm6    | 2737 | 1544 | 0   |
| miR-124mm6    | 2291 | 2005 | -50 | miR-124mm6    | 1469 | 966  | 0   | miR-124mm6    | 2569 | 1489 | 0   |
| miR-125a      | 2717 | 1794 | 0   | miR-125a      | 1026 | 958  | -50 | miR-125a      | 2575 | 1449 | 0   |
| miR-125a      | 2837 | 1811 | 0   | miR-125a      | 1026 | 932  | -50 | miR-125a      | 2716 | 1448 | 0   |
| miR-125b      | 4456 | 1842 | 0   | miR-125b      | 2065 | 948  | 0   | miR-125b      | 4147 | 1436 | 0   |
| miR-125b      | 4650 | 1886 | 0   | miR-125b      | 2110 | 953  | 0   | miR-125b      | 4488 | 1467 | 0   |
| miR-126       | 2767 | 1867 | 0   | miR-126       | 892  | 956  | -50 | miR-126       | 2645 | 1502 | 0   |
| miR-126       | 2874 | 1853 | 0   | miR-126       | 934  | 961  | -50 | miR-126       | 2672 | 1498 | 0   |
| miR-127       | 2887 | 1858 | 0   | miR-127       | 1042 | 948  | -50 | miR-127       | 2739 | 1498 | 0   |
| miR-127       | 2950 | 1909 | 0   | miR-127       | 1116 | 982  | -50 | miR-127       | 3280 | 1484 | 0   |
| miR-128b      | 3045 | 1937 | 0   | miR-128b      | 1212 | 1001 | -50 | miR-128b      | 3084 | 1475 | 0   |
| miR-128b      | 3022 | 1923 | 0   | miR-128b      | 1241 | 1007 | -50 | miR-128b      | 3042 | 1461 | 0   |
| miR-129a      | 3296 | 1992 | 0   | miR-129a      | 1644 | 1033 | 0   | miR-129a      | 2804 | 1496 | 0   |
| miR-129a      | 2906 | 1960 | 0   | miR-129a      | 1557 | 1013 | 0   | miR-129a      | 2954 | 1516 | 0   |
| miR-129       | 3347 | 1777 | 0   | miR-129       | 1837 | 908  | 0   | miR-129       | 4746 | 1465 | 0   |
| miR-129       | 3230 | 1793 | 0   | miR-129       | 1594 | 903  | 0   | miR-129       | 5990 | 1463 | 0   |
| miR-13a       | 3303 | 2057 | 0   | miR-13a       | 986  | 999  | -50 | miR-13a       | 3277 | 2518 | 0   |
| miR-13a       | 3285 | 2053 | 0   | miR-13a       | 997  | 1019 | -50 | miR-13a       | 3548 | 2517 | 0   |
| miR-130       | 2629 | 1824 | 0   | miR-130       | 914  | 900  | -50 | miR-130       | 2343 | 1497 | 0   |
| miR-130       | 2605 | 1812 | 0   | miR-130       | 910  | 930  | -50 | miR-130       | 2314 | 1468 | 0   |
| miR-130a      | 3780 | 2062 | 0   | miR-130a      | 1521 | 1068 | 0   | miR-130a      | 3395 | 1624 | 0   |
| miR-130a      | 3607 | 2084 | 0   | miR-130a      | 1258 | 1130 | -50 | miR-130a      | 3343 | 1658 | 0   |
| miR-130b      | 3296 | 1939 | 0   | miR-130b      | 1135 | 975  | -50 | miR-130b      | 2970 | 1516 | 0   |
| miR-130b      | 3211 | 1935 | 0   | miR-130b      | 1149 | 978  | -50 | miR-130b      | 3037 | 1513 | 0   |
| miR-9*        | 2214 | 1767 | -50 | miR-9*        | 916  | 951  | -50 | miR-9*        | 2062 | 1471 | 0   |

|            |      |      |     |            |      |      |     |            |      |      |     |
|------------|------|------|-----|------------|------|------|-----|------------|------|------|-----|
| miR-9*     | 2230 | 1791 | -50 | miR-9*     | 960  | 951  | -50 | miR-9*     | 2216 | 1474 | 0   |
| miR-132    | 2675 | 1832 | 0   | miR-132    | 1018 | 949  | -50 | miR-132    | 2454 | 1468 | 0   |
| miR-132    | 2722 | 1846 | 0   | miR-132    | 1039 | 952  | -50 | miR-132    | 2519 | 1475 | 0   |
| miR-133    | 3686 | 1775 | 0   | miR-133    | 1924 | 951  | 0   | miR-133    | 4933 | 1449 | 0   |
| miR-133    | 3765 | 1810 | 0   | miR-133    | 1957 | 952  | 0   | miR-133    | 4937 | 1483 | 0   |
| miR-134    | 2507 | 1909 | 0   | miR-134    | 992  | 963  | -50 | miR-134    | 2445 | 1489 | 0   |
| miR-134    | 2579 | 1799 | 0   | miR-134    | 1025 | 947  | -50 | miR-134    | 2347 | 1459 | 0   |
| miR-135a   | 1672 | 1776 | -50 | miR-135a   | 967  | 965  | -50 | miR-135a   | 1458 | 1493 | -50 |
| miR-135a   | 1742 | 1825 | -50 | miR-135a   | 1070 | 965  | -50 | miR-135a   | 1495 | 1490 | -50 |
| miR-136    | 2726 | 1843 | 0   | miR-136    | 1065 | 965  | -50 | miR-136    | 2876 | 1504 | 0   |
| miR-136    | 2686 | 1897 | 0   | miR-136    | 1135 | 963  | 0   | miR-136    | 2588 | 1501 | 0   |
| miR-137    | 2610 | 1892 | 0   | miR-137    | 1025 | 967  | -50 | miR-137    | 2787 | 1521 | 0   |
| miR-137    | 2889 | 1909 | 0   | miR-137    | 1006 | 981  | -50 | miR-137    | 2786 | 1505 | 0   |
| miR-138    | 3385 | 1874 | 0   | miR-138    | 1602 | 960  | 0   | miR-138    | 3367 | 1526 | 0   |
| miR-138    | 3418 | 1885 | 0   | miR-138    | 1515 | 986  | 0   | miR-138    | 3181 | 1518 | 0   |
| miR-139    | 2874 | 1921 | 0   | miR-139    | 1140 | 987  | -50 | miR-139    | 3088 | 1503 | 0   |
| miR-139    | 2904 | 1939 | 0   | miR-139    | 1150 | 993  | -50 | miR-139    | 3504 | 1466 | 0   |
| miR-14     | 1995 | 2032 | -50 | miR-14     | 998  | 1024 | -50 | miR-14     | 2455 | 2403 | 0   |
| miR-14     | 1999 | 2047 | -50 | miR-14     | 1016 | 1054 | -50 | miR-14     | 2499 | 2305 | 0   |
| miR-140*   | 2764 | 1785 | 0   | miR-140*   | 1225 | 901  | 0   | miR-140*   | 2742 | 1475 | 0   |
| miR-140*   | 2779 | 1797 | 0   | miR-140*   | 1332 | 918  | 0   | miR-140*   | 2843 | 1503 | 0   |
| miR-140    | 2501 | 1927 | 0   | miR-140    | 1029 | 1006 | -50 | miR-140    | 2276 | 1484 | 0   |
| miR-140    | 2316 | 1926 | -50 | miR-140    | 1054 | 990  | -50 | miR-140    | 2225 | 1513 | 0   |
| miR-141    | 2205 | 1816 | -50 | miR-141    | 925  | 912  | -50 | miR-141    | 2177 | 1547 | 0   |
| miR-141    | 2236 | 1813 | -50 | miR-141    | 946  | 922  | -50 | miR-141    | 2156 | 1501 | 0   |
| miR-142-3p | 2318 | 1782 | -50 | miR-142-3p | 1023 | 961  | -50 | miR-142-3p | 2370 | 1490 | 0   |
| miR-142-3p | 2542 | 1803 | 0   | miR-142-3p | 1077 | 938  | -50 | miR-142-3p | 2377 | 1497 | 0   |
| miR-142-5p | 2306 | 1791 | -50 | miR-142-5p | 951  | 953  | -50 | miR-142-5p | 2364 | 1522 | 0   |
| miR-142-5p | 2199 | 1772 | -50 | miR-142-5p | 923  | 966  | -50 | miR-142-5p | 2241 | 1465 | 0   |
| miR-143    | 2257 | 1806 | -50 | miR-143    | 926  | 949  | -50 | miR-143    | 2882 | 1545 | 0   |
| miR-143    | 2558 | 1799 | 0   | miR-143    | 913  | 968  | -50 | miR-143    | 2429 | 1507 | 0   |
| miR-144    | 4137 | 1801 | 0   | miR-144    | 7017 | 971  | 0   | miR-144    | 7238 | 1519 | 0   |
| miR-144    | 4143 | 1822 | 0   | miR-144    | 7062 | 982  | 0   | miR-144    | 7268 | 1480 | 0   |
| miR-145    | 3659 | 1841 | 0   | miR-145    | 2330 | 1027 | 0   | miR-145    | 3606 | 1504 | 0   |
| miR-145    | 4017 | 1834 | 0   | miR-145    | 2144 | 978  | 0   | miR-145    | 4090 | 1525 | 0   |
| miR-146    | 2760 | 1895 | 0   | miR-146    | 1053 | 958  | 0   | miR-146    | 2496 | 1546 | 0   |
| miR-146    | 2805 | 1923 | 0   | miR-146    | 1031 | 944  | 0   | miR-146    | 2614 | 1541 | 0   |
| miR-147    | 3694 | 1853 | 0   | miR-147    | 1891 | 956  | 0   | miR-147    | 4545 | 1535 | 0   |
| miR-147    | 3589 | 1888 | 0   | miR-147    | 1958 | 973  | 0   | miR-147    | 4888 | 1538 | 0   |
| miR-148a   | 2305 | 1899 | -50 | miR-148a   | 992  | 987  | 0   | miR-148a   | 2580 | 1586 | 0   |
| miR-148a   | 2324 | 1875 | -50 | miR-148a   | 1069 | 972  | 0   | miR-148a   | 2590 | 1586 | 0   |
| miR-149    | 3158 | 1903 | 0   | miR-149    | 1045 | 956  | 0   | miR-149    | 1692 | 1514 | 0   |
| miR-149    | 2417 | 1916 | -50 | miR-149    | 1089 | 979  | 0   | miR-149    | 1652 | 1499 | 0   |
| miR-150    | 1975 | 1935 | -50 | miR-150    | 1022 | 989  | 0   | miR-150    | 1621 | 1533 | -50 |
| miR-150    | 1967 | 1949 | -50 | miR-150    | 1070 | 1005 | 0   | miR-150    | 1647 | 1518 | -50 |
| miR-151    | 2673 | 1827 | 0   | miR-151    | 980  | 923  | 0   | miR-151    | 2681 | 1490 | 0   |
| miR-151    | 2673 | 1835 | 0   | miR-151    | 940  | 900  | 0   | miR-151    | 2596 | 1490 | 0   |

|           |      |      |     |           |      |      |     |           |      |      |     |
|-----------|------|------|-----|-----------|------|------|-----|-----------|------|------|-----|
| miR-152   | 2634 | 1806 | 0   | miR-152   | 982  | 899  | 0   | miR-152   | 2689 | 1498 | 0   |
| miR-152   | 2610 | 1852 | 0   | miR-152   | 1005 | 934  | 0   | miR-152   | 2691 | 1504 | 0   |
| miR-153   | 2283 | 1809 | -50 | miR-153   | 929  | 936  | 0   | miR-153   | 2394 | 1504 | 0   |
| miR-153   | 2522 | 1835 | 0   | miR-153   | 952  | 945  | 0   | miR-153   | 2378 | 1495 | 0   |
| miR-154   | 2562 | 1795 | 0   | miR-154   | 1081 | 938  | 0   | miR-154   | 2744 | 1506 | 0   |
| miR-154   | 2410 | 1806 | 0   | miR-154   | 1309 | 940  | 0   | miR-154   | 2435 | 1525 | 0   |
| miR-155   | 2424 | 1828 | 0   | miR-155   | 967  | 936  | 0   | miR-155   | 2309 | 1490 | 0   |
| miR-155   | 2430 | 1813 | 0   | miR-155   | 971  | 950  | 0   | miR-155   | 2225 | 1515 | 0   |
| miR-15a   | 2059 | 2054 | -50 | miR-15a   | 884  | 932  | 0   | miR-15a   | 2791 | 2754 | 0   |
| miR-15a   | 2078 | 2084 | -50 | miR-15a   | 909  | 910  | 0   | miR-15a   | 2548 | 2683 | -50 |
| miR-15b   | 3087 | 2074 | 0   | miR-15b   | 1055 | 903  | 0   | miR-15b   | 4814 | 2614 | 0   |
| miR-15b   | 3010 | 2093 | 0   | miR-15b   | 1060 | 904  | 0   | miR-15b   | 4335 | 2536 | 0   |
| miR-16    | 5009 | 2116 | 0   | miR-16    | 3938 | 917  | 0   | miR-16    | 4992 | 2435 | 0   |
| miR-16    | 5977 | 2094 | 0   | miR-16    | 3947 | 946  | 0   | miR-16    | 4620 | 2474 | 0   |
| miR-17-3p | 3637 | 2083 | 0   | miR-17-3p | 970  | 936  | 0   | miR-17-3p | 4172 | 2439 | 0   |
| miR-17-3p | 3736 | 2108 | 0   | miR-17-3p | 1044 | 970  | 0   | miR-17-3p | 4339 | 2400 | 0   |
| miR-18    | 2108 | 2127 | -50 | miR-18    | 985  | 976  | 0   | miR-18    | 2664 | 2534 | 0   |
| miR-18    | 2135 | 2126 | -50 | miR-18    | 996  | 986  | 0   | miR-18    | 2539 | 2441 | -50 |
| miR-181a  | 4465 | 1792 | 0   | miR-181a  | 3825 | 989  | 0   | miR-181a  | 5217 | 1506 | 0   |
| miR-181a  | 5193 | 1847 | 0   | miR-181a  | 4011 | 965  | 0   | miR-181a  | 5770 | 1516 | 0   |
| miR-182   | 2670 | 1883 | 0   | miR-182   | 1111 | 1000 | 0   | miR-182   | 3043 | 1530 | 0   |
| miR-182   | 2243 | 1837 | -50 | miR-182   | 1057 | 970  | 0   | miR-182   | 3142 | 1575 | 0   |
| miR-183   | 2450 | 1884 | 0   | miR-183   | 1002 | 936  | 0   | miR-183   | 2286 | 1541 | 0   |
| miR-183   | 2658 | 1946 | 0   | miR-183   | 994  | 944  | 0   | miR-183   | 2354 | 1538 | 0   |
| miR-184   | 4381 | 1900 | 0   | miR-184   | 2747 | 938  | 0   | miR-184   | 4465 | 1544 | 0   |
| miR-184   | 5829 | 1877 | 0   | miR-184   | 3347 | 970  | 0   | miR-184   | 5014 | 1562 | 0   |
| miR-185   | 3138 | 1901 | 0   | miR-185   | 998  | 974  | 0   | miR-185   | 2985 | 1542 | 0   |
| miR-185   | 2732 | 1871 | 0   | miR-185   | 1082 | 996  | 0   | miR-185   | 2772 | 1571 | 0   |
| miR-186   | 2330 | 1917 | -50 | miR-186   | 1047 | 990  | 0   | miR-186   | 2594 | 1562 | 0   |
| miR-186   | 2419 | 1896 | -50 | miR-186   | 1059 | 983  | 0   | miR-186   | 3146 | 1555 | 0   |
| miR-187   | 3003 | 1926 | 0   | miR-187   | 1462 | 988  | 0   | miR-187   | 3121 | 1549 | 0   |
| miR-187   | 2877 | 1943 | 0   | miR-187   | 1349 | 1005 | 0   | miR-187   | 3111 | 1546 | 0   |
| miR-188   | 3928 | 1825 | 0   | miR-188   | 1587 | 938  | 0   | miR-188   | 4288 | 1506 | 0   |
| miR-188   | 3673 | 1779 | 0   | miR-188   | 2079 | 907  | 0   | miR-188   | 4031 | 1515 | 0   |
| miR-189   | 2625 | 1796 | 0   | miR-189   | 968  | 898  | -50 | miR-189   | 2432 | 1527 | 0   |
| miR-189   | 2516 | 1799 | 0   | miR-189   | 955  | 927  | -50 | miR-189   | 2255 | 1530 | 0   |
| miR-19    | 2072 | 2153 | -50 | miR-19    | 985  | 1021 | -50 | miR-19    | 2406 | 2355 | -50 |
| miR-19    | 2147 | 2241 | -50 | miR-19    | 1009 | 1036 | -50 | miR-19    | 2314 | 2285 | -50 |
| miR-190   | 2133 | 1822 | -50 | miR-190   | 889  | 928  | -50 | miR-190   | 2647 | 1539 | 0   |
| miR-190   | 2066 | 1823 | -50 | miR-190   | 862  | 933  | -50 | miR-190   | 2574 | 1528 | 0   |
| miR-191   | 2638 | 1799 | 0   | miR-191   | 917  | 930  | -50 | miR-191   | 2902 | 1546 | 0   |
| miR-191   | 2639 | 1822 | 0   | miR-191   | 950  | 934  | -50 | miR-191   | 3495 | 1571 | 0   |
| miR-192   | 2693 | 1785 | 0   | miR-192   | 1017 | 926  | -50 | miR-192   | 3065 | 1505 | 0   |
| miR-192   | 2956 | 1876 | 0   | miR-192   | 1009 | 931  | -50 | miR-192   | 3075 | 1522 | 0   |
| miR-193   | 2729 | 1811 | 0   | miR-193   | 1692 | 992  | 0   | miR-193   | 3193 | 1538 | 0   |
| miR-193   | 3047 | 1847 | 0   | miR-193   | 1540 | 941  | 0   | miR-193   | 2908 | 1517 | 0   |
| miR-194   | 2870 | 1880 | 0   | miR-194   | 1107 | 935  | -50 | miR-194   | 2689 | 1544 | 0   |
| miR-194   | 2912 | 1869 | 0   | miR-194   | 1127 | 942  | -50 | miR-194   | 2379 | 1549 | 0   |
| miR-195   | 2782 | 1851 | 0   | miR-195   | 1051 | 946  | -50 | miR-195   | 2606 | 1527 | 0   |

|           |       |      |     |           |       |      |     |           |       |      |     |
|-----------|-------|------|-----|-----------|-------|------|-----|-----------|-------|------|-----|
| miR-195   | 2749  | 1849 | 0   | miR-195   | 976   | 966  | -50 | miR-195   | 2560  | 1533 | 0   |
| miR-196a  | 2974  | 1887 | 0   | miR-196a  | 1065  | 955  | -50 | miR-196a  | 2351  | 1531 | 0   |
| miR-196a  | 2682  | 1885 | 0   | miR-196a  | 1068  | 979  | -50 | miR-196a  | 2335  | 1589 | 0   |
| miR-197   | 3290  | 1867 | 0   | miR-197   | 1648  | 979  | 0   | miR-197   | 3431  | 1562 | 0   |
| miR-197   | 3044  | 1861 | 0   | miR-197   | 1551  | 965  | 0   | miR-197   | 3576  | 1582 | 0   |
| miR-198   | 8259  | 1935 | 0   | miR-198   | 2457  | 996  | 0   | miR-198   | 11247 | 1583 | 0   |
| miR-198   | 9443  | 1914 | 0   | miR-198   | 2465  | 985  | 0   | miR-198   | 11209 | 1560 | 0   |
| miR-199*  | 2055  | 2026 | -50 | miR-199*  | 986   | 1089 | -50 | miR-199*  | 2265  | 2336 | -50 |
| miR-199*  | 2079  | 2024 | -50 | miR-199*  | 1006  | 1086 | -50 | miR-199*  | 2607  | 2317 | -50 |
| miR-199   | 4938  | 1897 | 0   | miR-199   | 2259  | 995  | 0   | miR-199   | 6208  | 1554 | 0   |
| miR-199   | 5426  | 1902 | 0   | miR-199   | 1960  | 1039 | 0   | miR-199   | 6783  | 1537 | 0   |
| miR-2a    | 4242  | 2099 | -50 | miR-2a    | 7223  | 1001 | -50 | miR-2a    | 6383  | 2436 | 0   |
| miR-2a    | 4460  | 2050 | -50 | miR-2a    | 7176  | 1016 | -50 | miR-2a    | 6515  | 2501 | 0   |
| miR-20a   | 4288  | 2319 | 0   | miR-20a   | 1631  | 1015 | 0   | miR-20a   | 6407  | 2323 | 0   |
| miR-20a   | 4382  | 2215 | 0   | miR-20a   | 1203  | 1020 | 0   | miR-20a   | 5139  | 2339 | 0   |
| miR-200b  | 2147  | 2044 | 0   | miR-200b  | 1251  | 1019 | 0   | miR-200b  | 2821  | 2345 | 0   |
| miR-200b  | 2385  | 2048 | 0   | miR-200b  | 1374  | 995  | 0   | miR-200b  | 2827  | 2299 | 0   |
| miR-200c  | 3503  | 1963 | 0   | miR-200c  | 1064  | 944  | -50 | miR-200c  | 3629  | 1472 | 0   |
| miR-200c  | 3654  | 1977 | 0   | miR-200c  | 1113  | 943  | 0   | miR-200c  | 3363  | 1465 | 0   |
| miR-201   | 3567  | 2078 | 0   | miR-201   | 1192  | 1021 | -50 | miR-201   | 3385  | 2255 | 0   |
| miR-201   | 3228  | 2053 | 0   | miR-201   | 1228  | 1033 | -50 | miR-201   | 3132  | 2172 | 0   |
| miR-202   | 4111  | 2043 | 0   | miR-202   | 1508  | 1048 | 0   | miR-202   | 4105  | 2161 | 0   |
| miR-202   | 4050  | 2094 | 0   | miR-202   | 1461  | 1027 | 0   | miR-202   | 4299  | 2152 | 0   |
| miR-203   | 4663  | 2111 | 0   | miR-203   | 5478  | 986  | 0   | miR-203   | 6033  | 2179 | 0   |
| miR-203   | 4746  | 2109 | 0   | miR-203   | 5480  | 1000 | 0   | miR-203   | 6791  | 2175 | 0   |
| miR-204   | 3776  | 2161 | 0   | miR-204   | 1288  | 1048 | 0   | miR-204   | 3460  | 2134 | 0   |
| miR-204   | 3665  | 2127 | 0   | miR-204   | 1149  | 995  | -50 | miR-204   | 3461  | 2136 | 0   |
| miR-205   | 15398 | 2141 | 0   | miR-205   | 5605  | 996  | 0   | miR-205   | 20146 | 2135 | 0   |
| miR-205   | 16449 | 2143 | 0   | miR-205   | 5626  | 1029 | 0   | miR-205   | 19677 | 2164 | 0   |
| miR-206   | 10866 | 2140 | 0   | miR-206   | 3256  | 1047 | 0   | miR-206   | 15828 | 2137 | 0   |
| miR-206   | 10102 | 2140 | 0   | miR-206   | 3449  | 1023 | 0   | miR-206   | 14341 | 2102 | 0   |
| miR-207   | 4098  | 2181 | 0   | miR-207   | 2181  | 1006 | 0   | miR-207   | 4517  | 2083 | 0   |
| miR-207   | 3989  | 2123 | 0   | miR-207   | 2287  | 1002 | 0   | miR-207   | 4441  | 2144 | 0   |
| miR-208   | 3014  | 2138 | 0   | miR-208   | 1184  | 1004 | -50 | miR-208   | 2979  | 2148 | -50 |
| miR-208   | 2928  | 2189 | 0   | miR-208   | 1190  | 998  | -50 | miR-208   | 3097  | 2128 | 0   |
| miR-21    | 2220  | 2153 | -50 | miR-21    | 1011  | 1040 | -50 | miR-21    | 2464  | 2447 | -50 |
| miR-21    | 2056  | 2119 | -50 | miR-21    | 1101  | 1031 | 0   | miR-21    | 2511  | 2568 | -50 |
| miR-210   | 6613  | 2148 | 0   | miR-210   | 3420  | 1019 | 0   | miR-210   | 6581  | 2122 | 0   |
| miR-210   | 6584  | 2114 | 0   | miR-210   | 3361  | 1020 | 0   | miR-210   | 7094  | 2106 | 0   |
| miR-211   | 2977  | 2084 | 0   | miR-211   | 1604  | 1038 | 0   | miR-211   | 3341  | 2012 | 0   |
| miR-211   | 3058  | 2069 | 0   | miR-211   | 1576  | 1061 | 0   | miR-211   | 3433  | 1978 | 0   |
| miR-212   | 1917  | 2074 | -50 | miR-212   | 1005  | 1069 | -50 | miR-212   | 2317  | 2272 | -50 |
| miR-212   | 2015  | 2093 | -50 | miR-212   | 1074  | 1076 | -50 | miR-212   | 2384  | 2232 | -50 |
| miR-181a* | 2946  | 2043 | 0   | miR-181a* | 1125  | 1051 | -50 | miR-181a* | 3339  | 2268 | 0   |
| miR-181a* | 3090  | 2031 | 0   | miR-181a* | 1086  | 1006 | -50 | miR-181a* | 3365  | 2243 | 0   |
| miR-214   | 21984 | 2068 | 0   | miR-214   | 10033 | 998  | 0   | miR-214   | 21701 | 2162 | 0   |
| miR-214   | 20004 | 2060 | 0   | miR-214   | 10162 | 1049 | 0   | miR-214   | 21249 | 2170 | 0   |
| miR-215   | 3500  | 2054 | 0   | miR-215   | 1071  | 1029 | -50 | miR-215   | 3333  | 2165 | 0   |
| miR-215   | 3344  | 2126 | 0   | miR-215   | 1102  | 1011 | -50 | miR-215   | 3289  | 2171 | 0   |

|              |      |      |     |              |      |      |     |              |      |      |     |
|--------------|------|------|-----|--------------|------|------|-----|--------------|------|------|-----|
| miR-216      | 4263 | 2145 | 0   | miR-216      | 2202 | 989  | 0   | miR-216      | 4650 | 2172 | 0   |
| miR-216      | 3822 | 2142 | 0   | miR-216      | 2311 | 989  | 0   | miR-216      | 4559 | 2143 | 0   |
| miR-217      | 3050 | 2126 | 0   | miR-217      | 1080 | 972  | -50 | miR-217      | 2994 | 2159 | 0   |
| miR-217      | 3052 | 2093 | 0   | miR-217      | 1032 | 1000 | -50 | miR-217      | 2898 | 2130 | 0   |
| miR-218      | 3065 | 2089 | 0   | miR-218      | 1149 | 1030 | -50 | miR-218      | 3209 | 2228 | 0   |
| miR-218      | 3130 | 2111 | 0   | miR-218      | 1368 | 1060 | 0   | miR-218      | 2954 | 2256 | 0   |
| miR-219      | 2972 | 2101 | 0   | miR-219      | 1162 | 1043 | -50 | miR-219      | 3426 | 2159 | 0   |
| miR-219      | 2999 | 2131 | 0   | miR-219      | 1172 | 1028 | -50 | miR-219      | 3398 | 2300 | 0   |
| miR-22b      | 2159 | 2113 | -50 | miR-22b      | 1072 | 1034 | -50 | miR-22b      | 2665 | 2585 | -50 |
| miR-22b      | 2113 | 2099 | -50 | miR-22b      | 941  | 1037 | -50 | miR-22b      | 2890 | 2629 | 0   |
| miR-220      | 2060 | 2110 | -50 | miR-220      | 1125 | 1025 | -50 | miR-220      | 2069 | 2103 | 0   |
| miR-220      | 2071 | 2127 | -50 | miR-220      | 1054 | 1024 | -50 | miR-220      | 2345 | 2139 | 0   |
| miR-221      | 3311 | 2138 | 0   | miR-221      | 1652 | 1027 | 0   | miR-221      | 3795 | 2151 | 0   |
| miR-221      | 3346 | 2157 | 0   | miR-221      | 1689 | 1032 | 0   | miR-221      | 3866 | 2098 | 0   |
| miR-222      | 5434 | 2142 | 0   | miR-222      | 1291 | 1012 | -50 | miR-222      | 2253 | 2106 | -50 |
| miR-222      | 4906 | 2127 | 0   | miR-222      | 3112 | 1079 | 0   | miR-222      | 2882 | 2074 | 0   |
| miR-223      | 3956 | 2053 | 0   | miR-223      | 1606 | 1036 | 0   | miR-223      | 4012 | 2023 | 0   |
| miR-223      | 3722 | 2067 | 0   | miR-223      | 1543 | 1036 | 0   | miR-223      | 3864 | 2008 | 0   |
| miR-224      | 3487 | 2158 | 0   | miR-224      | 1034 | 1023 | -50 | miR-224      | 3189 | 2254 | 0   |
| miR-224      | 3111 | 2075 | 0   | miR-224      | 1018 | 1041 | -50 | miR-224      | 2944 | 2156 | 0   |
| miR-26ashort | 2749 | 1889 | 0   | miR-26ashort | 1196 | 1050 | -50 | miR-26ashort | 2270 | 1520 | 0   |
| miR-26ashort | 2383 | 1937 | -50 | miR-26ashort | 1277 | 1016 | 0   | miR-26ashort | 2495 | 1545 | 0   |
| miR-23a      | 2024 | 2080 | -50 | miR-23a      | 1020 | 1005 | -50 | miR-23a      | 2500 | 2452 | -50 |
| miR-23a      | 2166 | 2051 | -50 | miR-23a      | 989  | 1006 | -50 | miR-23a      | 2585 | 2419 | -50 |
| miR-23b      | 2061 | 2056 | -50 | miR-23b      | 920  | 1000 | -50 | miR-23b      | 2373 | 2459 | -50 |
| miR-23b      | 2023 | 2073 | -50 | miR-23b      | 968  | 1008 | -50 | miR-23b      | 2376 | 2457 | 0   |
| miR-24       | 2049 | 2018 | -50 | miR-24       | 1010 | 1013 | -50 | miR-24       | 2702 | 2225 | 0   |
| miR-24       | 1979 | 2039 | -50 | miR-24       | 1024 | 1014 | -50 | miR-24       | 2309 | 2261 | -50 |
| miR-25       | 3075 | 2017 | 0   | miR-25       | 1024 | 903  | -50 | miR-25       | 3759 | 2638 | 0   |
| miR-25       | 3338 | 2038 | 0   | miR-25       | 1026 | 904  | -50 | miR-25       | 4036 | 2630 | 0   |
| miR-263b     | 3153 | 2053 | 0   | miR-263b     | 1219 | 1074 | 0   | miR-263b     | 3203 | 2142 | 0   |
| miR-263b     | 3144 | 2046 | 0   | miR-263b     | 1181 | 1055 | -50 | miR-263b     | 3040 | 2143 | 0   |
| miR-26along  | 3162 | 2037 | 0   | miR-26along  | 1228 | 1002 | 0   | miR-26along  | 2849 | 1554 | 0   |
| miR-26along  | 3022 | 1962 | 0   | miR-26along  | 1254 | 969  | 0   | miR-26along  | 2693 | 1595 | 0   |
| miR-26mm2    | 2861 | 2033 | 0   | miR-26mm2    | 1046 | 1005 | -50 | miR-26mm2    | 2528 | 1440 | 0   |
| miR-26mm2    | 2587 | 1956 | 0   | miR-26mm2    | 1020 | 981  | -50 | miR-26mm2    | 2266 | 1470 | 0   |
| miR-26mm6    | 2386 | 1930 | -50 | miR-26mm6    | 1084 | 1031 | -50 | miR-26mm6    | 2306 | 1533 | 0   |
| miR-26mm6    | 2242 | 1922 | -50 | miR-26mm6    | 1099 | 1066 | -50 | miR-26mm6    | 2680 | 1566 | 0   |
| miR-275      | 3746 | 2093 | 0   | miR-275      | 1218 | 1055 | -50 | miR-275      | 3359 | 2175 | 0   |
| miR-275      | 3706 | 2099 | 0   | miR-275      | 1245 | 1047 | -50 | miR-275      | 3335 | 2192 | 0   |
| miR-276b     | 2869 | 2091 | 0   | miR-276b     | 1072 | 1033 | -50 | miR-276b     | 2641 | 2164 | -50 |
| miR-276b     | 2865 | 2157 | 0   | miR-276b     | 1089 | 1027 | -50 | miR-276b     | 2812 | 2123 | 0   |
| miR-277      | 2762 | 2117 | 0   | miR-277      | 1026 | 995  | -50 | miR-277      | 2529 | 2078 | -50 |
| miR-277      | 2767 | 2181 | -50 | miR-277      | 1073 | 1005 | -50 | miR-277      | 2551 | 2111 | -50 |
| miR-278      | 3140 | 2163 | 0   | miR-278      | 1213 | 1010 | -50 | miR-278      | 2991 | 2138 | 0   |

|             |      |      |     |             |      |      |     |             |      |      |     |
|-------------|------|------|-----|-------------|------|------|-----|-------------|------|------|-----|
| miR-278     | 2853 | 2137 | 0   | miR-278     | 1199 | 996  | -50 | miR-278     | 2799 | 2138 | -50 |
| miR-279     | 3120 | 2090 | 0   | miR-279     | 986  | 1010 | -50 | miR-279     | 3139 | 2200 | 0   |
| miR-279     | 2945 | 2090 | 0   | miR-279     | 1012 | 1036 | -50 | miR-279     | 2989 | 2192 | 0   |
| miR-27a     | 2086 | 2074 | -50 | miR-27a     | 905  | 914  | -50 | miR-27a     | 2552 | 2498 | -50 |
| miR-27a     | 1989 | 2085 | -50 | miR-27a     | 967  | 915  | -50 | miR-27a     | 2570 | 2469 | -50 |
| miR-27b     | 2949 | 2081 | 0   | miR-27b     | 1020 | 930  | -50 | miR-27b     | 3698 | 2426 | 0   |
| miR-27b     | 2861 | 2061 | 0   | miR-27b     | 1151 | 944  | 0   | miR-27b     | 3783 | 2529 | 0   |
| miR-28      | 2020 | 2072 | -50 | miR-28      | 998  | 995  | -50 | miR-28      | 2406 | 2412 | -50 |
| miR-28      | 2020 | 2096 | -50 | miR-28      | 1047 | 985  | -50 | miR-28      | 2429 | 2425 | -50 |
| miR-281     | 3348 | 2104 | 0   | miR-281     | 1130 | 1051 | -50 | miR-281     | 3226 | 2214 | 0   |
| miR-281     | 3054 | 2151 | 0   | miR-281     | 1131 | 1049 | -50 | miR-281     | 2888 | 2148 | -50 |
| miR-283     | 2943 | 2084 | 0   | miR-283     | 1161 | 1031 | -50 | miR-283     | 2833 | 2097 | 0   |
| miR-283     | 2765 | 2097 | 0   | miR-283     | 1050 | 1031 | -50 | miR-283     | 2824 | 2056 | 0   |
| miR-285     | 2927 | 2099 | 0   | miR-285     | 1075 | 1032 | -50 | miR-285     | 2970 | 2135 | 0   |
| miR-285     | 2980 | 2101 | 0   | miR-285     | 1087 | 1036 | -50 | miR-285     | 2878 | 2105 | 0   |
| miR-286     | 2813 | 2108 | 0   | miR-286     | 1134 | 1008 | -50 | miR-286     | 2945 | 2036 | 0   |
| miR-286     | 2880 | 2091 | 0   | miR-286     | 1125 | 1058 | -50 | miR-286     | 2957 | 2090 | 0   |
| miR-290     | 3520 | 2021 | 0   | miR-290     | 1249 | 1038 | -50 | miR-290     | 3450 | 2045 | 0   |
| miR-290     | 3256 | 2032 | 0   | miR-290     | 1226 | 1045 | 0   | miR-290     | 3750 | 2026 | 0   |
| miR-291a-3p | 3557 | 2059 | 0   | miR-291a-3p | 1351 | 1018 | 0   | miR-291a-3p | 3351 | 2173 | 0   |
| miR-291a-3p | 3487 | 2047 | 0   | miR-291a-3p | 1251 | 1092 | -50 | miR-291a-3p | 3728 | 2097 | 0   |
| miR-291-5p  | 3855 | 2059 | 0   | miR-291-5p  | 1217 | 1002 | -50 | miR-291-5p  | 3763 | 2188 | 0   |
| miR-291-5p  | 3918 | 2051 | 0   | miR-291-5p  | 1292 | 994  | 0   | miR-291-5p  | 3502 | 2170 | 0   |
| miR-292-3p  | 3413 | 2098 | 0   | miR-292-3p  | 1056 | 1030 | -50 | miR-292-3p  | 3340 | 2070 | 0   |
| miR-292-3p  | 3530 | 2151 | 0   | miR-292-3p  | 1014 | 1030 | -50 | miR-292-3p  | 3238 | 2086 | 0   |
| miR-292-5p  | 3951 | 2068 | 0   | miR-292-5p  | 1179 | 1063 | -50 | miR-292-5p  | 2887 | 2089 | 0   |
| miR-292-5p  | 3634 | 2071 | 0   | miR-292-5p  | 1173 | 1053 | -50 | miR-292-5p  | 3451 | 2122 | 0   |
| miR-293     | 3644 | 2108 | 0   | miR-293     | 1161 | 1024 | -50 | miR-293     | 2882 | 2052 | 0   |
| miR-293     | 3227 | 2138 | 0   | miR-293     | 1218 | 1041 | 0   | miR-293     | 3346 | 2158 | 0   |
| miR-294     | 3202 | 2115 | 0   | miR-294     | 1617 | 1050 | 0   | miR-294     | 3160 | 2131 | 0   |
| miR-294     | 3371 | 2110 | 0   | miR-294     | 1675 | 1018 | 0   | miR-294     | 3733 | 2144 | 0   |
| miR-295     | 2737 | 2126 | 0   | miR-295     | 1076 | 1010 | -50 | miR-295     | 2694 | 2186 | 0   |
| miR-295     | 2708 | 2086 | 0   | miR-295     | 1073 | 1048 | -50 | miR-295     | 2609 | 2161 | -50 |
| miR-296     | 5476 | 2119 | 0   | miR-296     | 2816 | 1056 | 0   | miR-296     | 5452 | 2141 | 0   |
| miR-296     | 5647 | 2112 | 0   | miR-296     | 2857 | 1055 | 0   | miR-296     | 5950 | 2103 | 0   |
| miR-297     | 5527 | 2110 | 0   | miR-297     | 2731 | 1044 | 0   | miR-297     | 7085 | 2078 | 0   |
| miR-297     | 5209 | 2117 | 0   | miR-297     | 2642 | 1039 | 0   | miR-297     | 6416 | 2085 | 0   |
| miR-298     | 3650 | 2074 | 0   | miR-298     | 1571 | 1025 | 0   | miR-298     | 3941 | 2133 | 0   |
| miR-298     | 3506 | 2100 | 0   | miR-298     | 1432 | 1014 | 0   | miR-298     | 4081 | 2021 | 0   |
| miR-299     | 2873 | 2109 | 0   | miR-299     | 1061 | 1010 | -50 | miR-299     | 2881 | 1982 | 0   |
| miR-299     | 2959 | 2089 | 0   | miR-299     | 1142 | 1032 | -50 | miR-299     | 2797 | 1986 | 0   |
| miR-29a     | 3210 | 2096 | 0   | miR-29a     | 1041 | 964  | -50 | miR-29a     | 4329 | 2428 | 0   |
| miR-29a     | 3172 | 2130 | 0   | miR-29a     | 969  | 988  | -50 | miR-29a     | 4002 | 2391 | 0   |
| miR-29b     | 2058 | 2105 | -50 | miR-29b     | 1071 | 1046 | -50 | miR-29b     | 2219 | 2353 | -50 |
| miR-29b     | 2098 | 2123 | -50 | miR-29b     | 1049 | 1057 | -50 | miR-29b     | 2394 | 2395 | 0   |



|           |      |      |     |           |      |      |     |           |      |      |     |
|-----------|------|------|-----|-----------|------|------|-----|-----------|------|------|-----|
| miR-29c   | 2147 | 2201 | -50 | miR-29c   | 973  | 1020 | -50 | miR-29c   | 2423 | 2346 | 0   |
| miR-29c   | 2136 | 2178 | -50 | miR-29c   | 1035 | 1023 | -50 | miR-29c   | 2310 | 2373 | -50 |
| miR-3     | 2055 | 2034 | -50 | miR-3     | 1005 | 1043 | -50 | miR-3     | 2733 | 2455 | 0   |
| miR-3     | 2031 | 2049 | -50 | miR-3     | 980  | 1059 | -50 | miR-3     | 2551 | 2380 | 0   |
| miR-300   | 3069 | 2039 | 0   | miR-300   | 1078 | 1023 | -50 | miR-300   | 3093 | 1896 | 0   |
| miR-300   | 3081 | 2039 | 0   | miR-300   | 1058 | 1037 | -50 | miR-300   | 3020 | 1922 | 0   |
| miR-301   | 5031 | 2090 | 0   | miR-301   | 1000 | 1007 | 0   | miR-301   | 6109 | 2283 | 0   |
| miR-301   | 5009 | 2120 | 0   | miR-301   | 8036 | 1016 | 0   | miR-301   | 6567 | 2143 | 0   |
| miR-302   | 2611 | 2085 | -50 | miR-302   | 8115 | 1046 | 0   | miR-302   | 2663 | 2187 | -50 |
| miR-302   | 2520 | 2097 | 0   | miR-302   | 1101 | 1059 | -50 | miR-302   | 2478 | 2089 | 0   |
| miR-303   | 2791 | 2080 | 0   | miR-303   | 1061 | 1035 | -50 | miR-303   | 2687 | 2144 | 0   |
| miR-303   | 2601 | 2109 | 0   | miR-303   | 1026 | 1049 | -50 | miR-303   | 2655 | 2058 | -50 |
| miR-304   | 2650 | 2123 | 0   | miR-304   | 981  | 1035 | -50 | miR-304   | 2489 | 2014 | -50 |
| miR-304   | 2736 | 2110 | 0   | miR-304   | 1066 | 1045 | -50 | miR-304   | 2567 | 2076 | 0   |
| miR-305   | 2965 | 2120 | 0   | miR-305   | 1146 | 1050 | 0   | miR-305   | 2681 | 2051 | 0   |
| miR-305   | 2973 | 2102 | 0   | miR-305   | 1193 | 1022 | 0   | miR-305   | 2671 | 2214 | 0   |
| miR-306   | 2552 | 2086 | -50 | miR-306   | 1005 | 1049 | -50 | miR-306   | 2623 | 2084 | -50 |
| miR-306   | 2360 | 2097 | -50 | miR-306   | 1100 | 1024 | -50 | miR-306   | 2784 | 2094 | 0   |
| miR-307   | 2988 | 2067 | 0   | miR-307   | 1027 | 1030 | -50 | miR-307   | 3029 | 2110 | 0   |
| miR-307   | 2860 | 2019 | 0   | miR-307   | 1047 | 1063 | -50 | miR-307   | 2615 | 2096 | -50 |
| miR-308   | 3140 | 2074 | 0   | miR-308   | 996  | 1066 | -50 | miR-308   | 3108 | 2202 | 0   |
| miR-308   | 3267 | 2089 | 0   | miR-308   | 1006 | 1034 | -50 | miR-308   | 2938 | 2131 | 0   |
| miR-309   | 2668 | 2075 | 0   | miR-309   | 1019 | 1046 | -50 | miR-309   | 2580 | 2089 | 0   |
| miR-309   | 2870 | 2129 | 0   | miR-309   | 1009 | 1047 | -50 | miR-309   | 2659 | 2070 | 0   |
| miR-30-as | 2908 | 2116 | 0   | miR-30-as | 1003 | 1001 | -50 | miR-30-as | 2983 | 2861 | 0   |
| miR-30-as | 2975 | 2108 | 0   | miR-30-as | 1015 | 994  | -50 | miR-30-as | 3027 | 2692 | -50 |
| miR-30a-s | 2134 | 2124 | -50 | miR-30a-s | 998  | 1039 | -50 | miR-30a-s | 2964 | 2539 | 0   |
| miR-30a-s | 2021 | 2109 | -50 | miR-30a-s | 1062 | 1028 | -50 | miR-30a-s | 2549 | 2621 | -50 |
| miR-31    | 3246 | 2104 | 0   | miR-31    | 1015 | 1010 | -50 | miR-31    | 3113 | 2549 | -50 |
| miR-31    | 3153 | 2060 | 0   | miR-31    | 1014 | 1010 | -50 | miR-31    | 3359 | 2460 | -50 |
| miR-310   | 3254 | 2090 | 0   | miR-310   | 1379 | 1076 | 0   | miR-310   | 3211 | 2101 | 0   |
| miR-310   | 3131 | 2083 | 0   | miR-310   | 1339 | 1095 | 0   | miR-310   | 3077 | 2039 | 0   |
| miR-311   | 2939 | 2102 | 0   | miR-311   | 1167 | 1019 | -50 | miR-311   | 2865 | 1936 | 0   |
| miR-311   | 2909 | 2087 | 0   | miR-311   | 1128 | 1031 | -50 | miR-311   | 2447 | 1941 | -50 |
| miR-312   | 2868 | 2102 | 0   | miR-312   | 1202 | 1040 | 0   | miR-312   | 2623 | 1919 | 0   |
| miR-312   | 2842 | 2036 | 0   | miR-312   | 1160 | 1049 | -50 | miR-312   | 2227 | 1875 | -50 |
| miR-313   | 2908 | 2110 | 0   | miR-313   | 1085 | 968  | -50 | miR-313   | 3269 | 2203 | 0   |
| miR-313   | 2852 | 2100 | 0   | miR-313   | 1116 | 990  | -50 | miR-313   | 3223 | 2134 | 0   |
| miR-314   | 2691 | 2086 | -50 | miR-314   | 1011 | 1009 | -50 | miR-314   | 2455 | 2130 | -50 |
| miR-314   | 2558 | 2095 | -50 | miR-314   | 1004 | 1051 | -50 | miR-314   | 2452 | 2101 | 0   |
| miR-315   | 2675 | 2116 | 0   | miR-315   | 1084 | 1034 | -50 | miR-315   | 2497 | 2081 | -50 |
| miR-315   | 2712 | 2094 | 0   | miR-315   | 1116 | 1036 | -50 | miR-315   | 2572 | 2015 | -50 |
| miR-316   | 2431 | 2085 | -50 | miR-316   | 1114 | 1020 | -50 | miR-316   | 3777 | 1976 | 0   |
| miR-316   | 2616 | 2063 | 0   | miR-316   | 1035 | 1036 | -50 | miR-316   | 2422 | 2063 | -50 |
| miR-317   | 2877 | 2096 | 0   | miR-317   | 1085 | 1027 | -50 | miR-317   | 2709 | 2028 | -50 |
| miR-317   | 2888 | 2099 | 0   | miR-317   | 1070 | 1024 | -50 | miR-317   | 2779 | 2177 | -50 |
| miR-318   | 2811 | 2108 | 0   | miR-318   | 1236 | 1068 | 0   | miR-318   | 3179 | 2223 | 0   |
| miR-318   | 2909 | 2074 | 0   | miR-318   | 1104 | 1044 | -50 | miR-318   | 3049 | 2175 | 0   |
| miR-32    | 2057 | 2032 | -50 | miR-32    | 1011 | 1015 | -50 | miR-32    | 2627 | 2320 | 0   |

|         |       |      |     |         |       |      |     |         |       |      |     |
|---------|-------|------|-----|---------|-------|------|-----|---------|-------|------|-----|
| miR-32  | 1998  | 2042 | -50 | miR-32  | 998   | 991  | -50 | miR-32  | 2209  | 2307 | -50 |
| miR-320 | 8288  | 2055 | 0   | miR-320 | 1822  | 1046 | 0   | miR-320 | 7218  | 2131 | 0   |
| miR-320 | 8340  | 2082 | 0   | miR-320 | 1694  | 1054 | 0   | miR-320 | 6897  | 2114 | 0   |
| miR-321 | 31751 | 2066 | 0   | miR-321 | 34090 | 1038 | 0   | miR-321 | 51329 | 2094 | 0   |
| miR-321 | 32577 | 2071 | 0   | miR-321 | 34837 | 1038 | 0   | miR-321 | 48405 | 2079 | 0   |
| miR-322 | 2770  | 2026 | 0   | miR-322 | 1189  | 1051 | -50 | miR-322 | 2681  | 2091 | 0   |
| miR-322 | 2933  | 2143 | 0   | miR-322 | 1080  | 1032 | -50 | miR-322 | 2578  | 2023 | -50 |
| miR-323 | 3070  | 2094 | 0   | miR-323 | 1165  | 1038 | -50 | miR-323 | 3932  | 2022 | 0   |
| miR-323 | 3200  | 2062 | 0   | miR-323 | 1150  | 1031 | -50 | miR-323 | 3255  | 1956 | 0   |
| miR-324 | 2036  | 2079 | -50 | miR-324 | 1053  | 1030 | -50 | miR-324 | 1966  | 1939 | -50 |
| miR-324 | 2103  | 2078 | -50 | miR-324 | 1160  | 1041 | 0   | miR-324 | 1875  | 1909 | -50 |
| miR-325 | 2031  | 2039 | -50 | miR-325 | 1063  | 1027 | -50 | miR-325 | 1883  | 1878 | -50 |
| miR-325 | 1970  | 2022 | -50 | miR-325 | 1114  | 1075 | -50 | miR-325 | 1907  | 1858 | -50 |
| miR-326 | 4271  | 2068 | 0   | miR-326 | 1590  | 983  | 0   | miR-326 | 4437  | 2043 | 0   |
| miR-326 | 4156  | 2060 | 0   | miR-326 | 1597  | 985  | 0   | miR-326 | 4352  | 2066 | 0   |
| miR-327 | 5797  | 2079 | 0   | miR-327 | 1420  | 1000 | 0   | miR-327 | 3830  | 2070 | 0   |
| miR-327 | 5295  | 2076 | 0   | miR-327 | 1495  | 1054 | 0   | miR-327 | 3946  | 2042 | 0   |
| miR-328 | 3873  | 2065 | 0   | miR-328 | 1816  | 1051 | 0   | miR-328 | 4213  | 2036 | 0   |
| miR-328 | 3913  | 2081 | 0   | miR-328 | 1940  | 1029 | 0   | miR-328 | 4159  | 2043 | 0   |
| miR-329 | 3225  | 2103 | 0   | miR-329 | 1086  | 995  | -50 | miR-329 | 3124  | 2024 | 0   |
| miR-329 | 3006  | 2103 | 0   | miR-329 | 1039  | 1005 | -50 | miR-329 | 3353  | 2079 | 0   |
| miR-33  | 2060  | 2017 | -50 | miR-33  | 946   | 1005 | -50 | miR-33  | 2863  | 2298 | 0   |
| miR-33  | 2130  | 2061 | -50 | miR-33  | 912   | 984  | -50 | miR-33  | 2573  | 2271 | -50 |
| miR-330 | 3006  | 2070 | 0   | miR-330 | 994   | 1028 | -50 | miR-330 | 2617  | 2045 | -50 |
| miR-330 | 2891  | 2103 | 0   | miR-330 | 1035  | 1028 | -50 | miR-330 | 2835  | 2178 | 0   |
| miR-331 | 3994  | 2096 | 0   | miR-331 | 1550  | 1052 | 0   | miR-331 | 4730  | 2102 | 0   |
| miR-331 | 3942  | 2090 | 0   | miR-331 | 1379  | 1040 | -50 | miR-331 | 4551  | 2140 | 0   |
| miR-333 | 3831  | 2101 | 0   | miR-333 | 2097  | 992  | 0   | miR-333 | 4281  | 2114 | 0   |
| miR-333 | 3563  | 2123 | 0   | miR-333 | 2566  | 1053 | 0   | miR-333 | 3979  | 2036 | 0   |
| miR-335 | 3226  | 2096 | 0   | miR-335 | 1027  | 1033 | -50 | miR-335 | 2766  | 2078 | -50 |
| miR-335 | 3464  | 2086 | 0   | miR-335 | 1061  | 1043 | 0   | miR-335 | 3180  | 2029 | 0   |
| miR-336 | 3078  | 2046 | 0   | miR-336 | 1067  | 1039 | 0   | miR-336 | 3145  | 2042 | 0   |
| miR-336 | 2860  | 2057 | 0   | miR-336 | 1065  | 1030 | 0   | miR-336 | 2844  | 2033 | 0   |
| miR-337 | 2651  | 2047 | -50 | miR-337 | 1143  | 1032 | 0   | miR-337 | 3074  | 2061 | 0   |
| miR-337 | 2619  | 2062 | -50 | miR-337 | 1191  | 1008 | 0   | miR-337 | 2704  | 1973 | 0   |
| miR-338 | 2664  | 2075 | 0   | miR-338 | 7148  | 984  | 0   | miR-338 | 6678  | 1844 | 0   |
| miR-338 | 6135  | 2130 | 0   | miR-338 | 7170  | 978  | 0   | miR-338 | 6548  | 1807 | 0   |
| miR-339 | 5970  | 2034 | 0   | miR-339 | 1255  | 1016 | 0   | miR-339 | 3027  | 1851 | 0   |
| miR-339 | 3011  | 2043 | 0   | miR-339 | 1302  | 1060 | 0   | miR-339 | 2968  | 1821 | 0   |
| miR-34  | 1890  | 1976 | -50 | miR-34  | 887   | 879  | -50 | miR-34  | 3160  | 2674 | 0   |
| miR-34  | 2002  | 1990 | -50 | miR-34  | 863   | 894  | -50 | miR-34  | 2523  | 2519 | -50 |
| miR-340 | 2024  | 2043 | -50 | miR-340 | 1057  | 993  | 0   | miR-340 | 2152  | 1954 | 0   |
| miR-340 | 2067  | 2059 | -50 | miR-340 | 1122  | 1023 | 0   | miR-340 | 2158  | 2032 | -50 |
| miR-341 | 3715  | 2068 | 0   | miR-341 | 1468  | 1034 | 0   | miR-341 | 3264  | 2033 | 0   |
| miR-341 | 3430  | 2056 | 0   | miR-341 | 1514  | 1004 | 0   | miR-341 | 3407  | 2040 | 0   |
| miR-342 | 2455  | 2067 | -50 | miR-342 | 1104  | 1022 | 0   | miR-342 | 3225  | 1985 | 0   |
| miR-342 | 2937  | 2076 | 0   | miR-342 | 1057  | 1004 | 0   | miR-342 | 3051  | 2034 | 0   |
| miR-343 | 4032  | 2074 | 0   | miR-343 | 1613  | 1007 | 0   | miR-343 | 4335  | 2102 | 0   |
| miR-343 | 4159  | 2072 | 0   | miR-343 | 1680  | 1025 | 0   | miR-343 | 4368  | 2058 | 0   |

|          |      |      |     |          |      |      |     |          |      |      |     |
|----------|------|------|-----|----------|------|------|-----|----------|------|------|-----|
| miR-344  | 2795 | 2166 | 0   | miR-344  | 1051 | 1025 | 0   | miR-344  | 2923 | 2137 | 0   |
| miR-344  | 2790 | 2093 | 0   | miR-344  | 1081 | 1043 | 0   | miR-344  | 2842 | 2100 | 0   |
| miR-345  | 3780 | 2124 | 0   | miR-345  | 1779 | 1016 | 0   | miR-345  | 4137 | 2107 | 0   |
| miR-345  | 3400 | 2119 | 0   | miR-345  | 1911 | 1049 | 0   | miR-345  | 4251 | 2125 | 0   |
| miR-346  | 3785 | 2080 | 0   | miR-346  | 1521 | 1013 | 0   | miR-346  | 3500 | 2067 | 0   |
| miR-346  | 2339 | 2089 | 0   | miR-346  | 1552 | 1059 | 0   | miR-346  | 3660 | 2030 | 0   |
| miR-347  | 2835 | 2066 | 0   | miR-347  | 1099 | 1062 | 0   | miR-347  | 2786 | 2025 | -50 |
| miR-347  | 3873 | 2045 | 0   | miR-347  | 1051 | 1007 | 0   | miR-347  | 4217 | 1978 | 0   |
| miR-349  | 3311 | 2055 | 0   | miR-349  | 1193 | 1029 | 0   | miR-349  | 3285 | 1986 | 0   |
| miR-349  | 3264 | 2014 | 0   | miR-349  | 1371 | 1053 | 0   | miR-349  | 3276 | 1944 | 0   |
| miR-34a  | 3588 | 1916 | 0   | miR-34a  | 1295 | 1092 | 0   | miR-34a  | 3554 | 1592 | 0   |
| miR-34a  | 3227 | 1904 | 0   | miR-34a  | 1668 | 1288 | 0   | miR-34a  | 3465 | 1573 | 0   |
| miR-34b  | 2718 | 2018 | 0   | miR-34b  | 1174 | 1097 | 0   | miR-34b  | 2692 | 1618 | 0   |
| miR-34b  | 2687 | 2029 | 0   | miR-34b  | 1121 | 1060 | 0   | miR-34b  | 2634 | 1609 | 0   |
| miR-34c  | 2989 | 2051 | 0   | miR-34c  | 977  | 1013 | -50 | miR-34c  | 2736 | 1575 | 0   |
| miR-34c  | 2906 | 2036 | 0   | miR-34c  | 1013 | 966  | -50 | miR-34c  | 2935 | 1566 | 0   |
| miR-35   | 2024 | 2002 | -50 | miR-35   | 879  | 918  | -50 | miR-35   | 2823 | 2453 | 0   |
| miR-35   | 2000 | 2027 | -50 | miR-35   | 929  | 926  | -50 | miR-35   | 2679 | 2528 | 0   |
| miR-350  | 2928 | 2064 | 0   | miR-350  | 1083 | 1025 | 0   | miR-350  | 2877 | 1905 | 0   |
| miR-350  | 2950 | 2083 | 0   | miR-350  | 1064 | 992  | 0   | miR-350  | 2568 | 1864 | 0   |
| miR-351  | 3137 | 2058 | 0   | miR-351  | 1157 | 981  | 0   | miR-351  | 3229 | 1758 | 0   |
| miR-351  | 3030 | 2010 | 0   | miR-351  | 1143 | 968  | 0   | miR-351  | 3108 | 1829 | 0   |
| miR-352  | 3158 | 2026 | 0   | miR-352  | 1152 | 1031 | 0   | miR-352  | 2942 | 1778 | 0   |
| miR-352  | 2929 | 2015 | 0   | miR-352  | 1241 | 1074 | 0   | miR-352  | 2761 | 1789 | 0   |
| miR-36   | 1998 | 2022 | -50 | miR-36   | 953  | 963  | 0   | miR-36   | 2679 | 2544 | 0   |
| miR-36   | 2004 | 1977 | -50 | miR-36   | 985  | 971  | 0   | miR-36   | 2661 | 2510 | 0   |
| miR-361  | 3150 | 1971 | 0   | miR-361  | 1032 | 993  | 0   | miR-361  | 2879 | 1535 | 0   |
| miR-361  | 3061 | 1952 | 0   | miR-361  | 1128 | 1007 | 0   | miR-361  | 2756 | 1540 | 0   |
| miR-365  | 3044 | 1937 | 0   | miR-365  | 1149 | 1039 | 0   | miR-365  | 2925 | 1604 | 0   |
| miR-365  | 3182 | 1915 | 0   | miR-365  | 1112 | 988  | 0   | miR-365  | 3094 | 1623 | 0   |
| miR-367  | 2933 | 2092 | 0   | miR-367  | 1419 | 1054 | 0   | miR-367  | 2696 | 1564 | 0   |
| miR-367  | 2770 | 2084 | 0   | miR-367  | 1097 | 1100 | 0   | miR-367  | 2674 | 1610 | 0   |
| miR-368  | 2748 | 1981 | 0   | miR-368  | 996  | 1195 | 0   | miR-368  | 2428 | 1602 | 0   |
| miR-368  | 2769 | 2012 | 0   | miR-368  | 1085 | 1143 | 0   | miR-368  | 2527 | 1617 | 0   |
| miR-369  | 2938 | 2080 | 0   | miR-369  | 1119 | 1006 | -50 | miR-369  | 2569 | 1677 | 0   |
| miR-369  | 2944 | 2004 | 0   | miR-369  | 1127 | 1008 | 0   | miR-369  | 2685 | 1697 | 0   |
| miR-37   | 3038 | 2018 | 0   | miR-37   | 941  | 952  | 0   | miR-37   | 3778 | 2413 | 0   |
| miR-37   | 2905 | 2036 | 0   | miR-37   | 969  | 969  | 0   | miR-37   | 3727 | 2436 | 0   |
| miR-370  | 4873 | 2074 | 0   | miR-370  | 2010 | 1139 | 0   | miR-370  | 4083 | 1640 | 0   |
| miR-370  | 3446 | 2078 | 0   | miR-370  | 1911 | 1119 | 0   | miR-370  | 3704 | 1630 | 0   |
| miR-371  | 3547 | 2001 | 0   | miR-371  | 2005 | 967  | 0   | miR-371  | 4768 | 1479 | 0   |
| miR-371  | 4563 | 1971 | 0   | miR-371  | 1896 | 941  | 0   | miR-371  | 3776 | 1459 | 0   |
| miR-372  | 3037 | 1990 | 0   | miR-372  | 959  | 985  | -50 | miR-372  | 2763 | 1500 | 0   |
| miR-372  | 2894 | 2001 | 0   | miR-372  | 977  | 971  | 0   | miR-372  | 2738 | 1497 | 0   |
| miR-373  | 3612 | 1987 | 0   | miR-373  | 3126 | 991  | 0   | miR-373  | 4209 | 1508 | 0   |
| miR-373  | 3908 | 2005 | 0   | miR-373  | 3245 | 1007 | 0   | miR-373  | 4395 | 1542 | 0   |
| miR-373* | 4324 | 2021 | 0   | miR-373* | 1206 | 1004 | 0   | miR-373* | 4160 | 1482 | 0   |
| miR-373* | 4313 | 1964 | 0   | miR-373* | 1140 | 983  | 0   | miR-373* | 3844 | 1475 | 0   |
| miR-374  | 2859 | 1948 | 0   | miR-374  | 1148 | 999  | 0   | miR-374  | 2779 | 1539 | 0   |

|            |      |      |     |            |      |      |     |            |      |      |     |
|------------|------|------|-----|------------|------|------|-----|------------|------|------|-----|
| miR-374    | 2876 | 1927 | 0   | miR-374    | 1205 | 1025 | 0   | miR-374    | 2692 | 1529 | 0   |
| miR-375    | 3283 | 1944 | 0   | miR-375    | 1517 | 1337 | 0   | miR-375    | 3472 | 1562 | 0   |
| miR-375    | 3117 | 1946 | 0   | miR-375    | 1518 | 1254 | 0   | miR-375    | 3389 | 1571 | 0   |
| miR-376a   | 2784 | 2092 | 0   | miR-376a   | 990  | 1000 | -50 | miR-376a   | 2942 | 1616 | 0   |
| miR-376a   | 2442 | 2043 | -50 | miR-376a   | 1070 | 979  | 0   | miR-376a   | 2704 | 1665 | 0   |
| miR-376b   | 2918 | 2062 | 0   | miR-376b   | 1114 | 1072 | 0   | miR-376b   | 3029 | 1608 | 0   |
| miR-376b   | 2890 | 2102 | 0   | miR-376b   | 1071 | 1060 | 0   | miR-376b   | 2905 | 1577 | 0   |
| miR-377    | 3094 | 2016 | 0   | miR-377    | 979  | 962  | 0   | miR-377    | 2958 | 1486 | 0   |
| miR-377    | 3144 | 1999 | 0   | miR-377    | 1029 | 975  | 0   | miR-377    | 2737 | 1485 | 0   |
| miR-378    | 4136 | 1937 | 0   | miR-378    | 1565 | 1120 | 0   | miR-378    | 4784 | 1542 | 0   |
| miR-378    | 3445 | 1937 | 0   | miR-378    | 1336 | 1122 | -50 | miR-378    | 3858 | 1531 | 0   |
| miR-379    | 3281 | 2010 | 0   | miR-379    | 1048 | 985  | -50 | miR-379    | 2773 | 1493 | 0   |
| miR-379    | 3046 | 1990 | 0   | miR-379    | 1079 | 983  | -50 | miR-379    | 2752 | 1484 | 0   |
| miR-38     | 1965 | 2061 | -50 | miR-38     | 998  | 975  | -50 | miR-38     | 2580 | 2430 | 0   |
| miR-38     | 1948 | 2116 | -50 | miR-38     | 1024 | 1004 | -50 | miR-38     | 2359 | 2366 | -50 |
| miR-380-3p | 2815 | 1967 | 0   | miR-380-3p | 1107 | 1026 | 0   | miR-380-3p | 2503 | 1482 | 0   |
| miR-380-3p | 3151 | 2077 | 0   | miR-380-3p | 1079 | 984  | -50 | miR-380-3p | 2470 | 1465 | 0   |
| miR-380-5p | 3321 | 1893 | 0   | miR-380-5p | 1252 | 1116 | -50 | miR-380-5p | 2836 | 1548 | 0   |
| miR-380-5p | 3157 | 1912 | 0   | miR-380-5p | 1271 | 1130 | -50 | miR-380-5p | 2815 | 1570 | 0   |
| miR-381    | 2868 | 2011 | 0   | miR-381    | 997  | 1013 | -50 | miR-381    | 2583 | 1516 | 0   |
| miR-381    | 2961 | 2005 | 0   | miR-381    | 1083 | 993  | -50 | miR-381    | 2595 | 1509 | 0   |
| miR-382    | 3368 | 2002 | 0   | miR-382    | 1423 | 1016 | 0   | miR-382    | 3275 | 1528 | 0   |
| miR-382    | 3411 | 1970 | 0   | miR-382    | 1560 | 1023 | 0   | miR-382    | 3341 | 1525 | 0   |
| miR-383    | 2963 | 1970 | 0   | miR-383    | 1030 | 1089 | -50 | miR-383    | 2759 | 1608 | 0   |
| miR-383    | 2954 | 2053 | 0   | miR-383    | 1018 | 1067 | -50 | miR-383    | 2953 | 1627 | 0   |
| miR-384    | 3129 | 2013 | 0   | miR-384    | 1068 | 984  | -50 | miR-384    | 2714 | 1479 | 0   |
| miR-384    | 3221 | 2013 | 0   | miR-384    | 1022 | 971  | -50 | miR-384    | 2939 | 1493 | 0   |
| miR-39     | 1939 | 2083 | -50 | miR-39     | 1042 | 1043 | -50 | miR-39     | 2184 | 2302 | -50 |
| miR-39     | 2105 | 2088 | -50 | miR-39     | 966  | 1050 | -50 | miR-39     | 2277 | 2350 | -50 |
| miR-4      | 3160 | 2090 | 0   | miR-4      | 966  | 915  | -50 | miR-4      | 5771 | 2673 | 0   |
| miR-4      | 3297 | 2106 | 0   | miR-4      | 929  | 899  | -50 | miR-4      | 5389 | 2612 | 0   |
| miR-40     | 2037 | 2110 | -50 | miR-40     | 1085 | 1025 | -50 | miR-40     | 2321 | 2299 | -50 |
| miR-40     | 2032 | 2103 | -50 | miR-40     | 990  | 1032 | -50 | miR-40     | 2304 | 2406 | -50 |
| miR-409    | 4963 | 1937 | 0   | miR-409    | 2083 | 1091 | 0   | miR-409    | 5021 | 1539 | 0   |
| miR-409    | 4336 | 1928 | 0   | miR-409    | 2141 | 1144 | 0   | miR-409    | 4844 | 1544 | 0   |
| miR-41     | 2081 | 2084 | -50 | miR-41     | 992  | 1028 | -50 | miR-41     | 2647 | 2528 | 0   |
| miR-41     | 1998 | 2087 | -50 | miR-41     | 1016 | 1038 | -50 | miR-41     | 2872 | 2743 | 0   |
| miR-410    | 1994 | 1989 | 0   | miR-410    | 1069 | 977  | -50 | miR-410    | 2049 | 1454 | 0   |
| miR-410    | 2084 | 2011 | 0   | miR-410    | 1035 | 989  | -50 | miR-410    | 2058 | 1467 | 0   |
| miR-411    | 3074 | 2005 | 0   | miR-411    | 954  | 1004 | -50 | miR-411    | 3050 | 1516 | 0   |
| miR-411    | 3063 | 1981 | 0   | miR-411    | 975  | 1035 | -50 | miR-411    | 3119 | 1498 | 0   |
| miR-412    | 2049 | 1952 | 0   | miR-412    | 1143 | 1041 | -50 | miR-412    | 2046 | 1566 | 0   |
| miR-412    | 2123 | 1947 | 0   | miR-412    | 1105 | 1082 | -50 | miR-412    | 2065 | 1547 | 0   |
| miR-42     | 3223 | 2068 | 0   | miR-42     | 951  | 1035 | -50 | miR-42     | 3657 | 2867 | 0   |
| miR-42     | 3250 | 2113 | 0   | miR-42     | 944  | 994  | -50 | miR-42     | 3660 | 2802 | 0   |
| miR-425    | 2970 | 2003 | 0   | miR-425    | 1126 | 958  | -50 | miR-425    | 2998 | 1556 | 0   |
| miR-425    | 2979 | 2005 | 0   | miR-425    | 1151 | 975  | -50 | miR-425    | 3165 | 1538 | 0   |

|          |      |      |     |          |      |      |     |          |      |      |     |
|----------|------|------|-----|----------|------|------|-----|----------|------|------|-----|
| miR-429  | 2899 | 1935 | 0   | miR-429  | 1121 | 1018 | -50 | miR-429  | 2705 | 1522 | 0   |
| miR-429  | 3072 | 1954 | 0   | miR-429  | 1179 | 1043 | -50 | miR-429  | 2894 | 1504 | 0   |
| miR-43   | 1943 | 2120 | -50 | miR-43   | 1019 | 994  | -50 | miR-43   | 2327 | 2449 | -50 |
| miR-43   | 2025 | 2053 | -50 | miR-43   | 1022 | 1048 | -50 | miR-43   | 2396 | 2379 | -50 |
| miR-430a | 3035 | 2005 | 0   | miR-430a | 1185 | 962  | 0   | miR-430a | 2798 | 1518 | 0   |
| miR-430a | 2967 | 1978 | 0   | miR-430a | 1173 | 999  | -50 | miR-430a | 2799 | 1545 | 0   |
| miR-430b | 2919 | 1966 | 0   | miR-430b | 1087 | 1000 | -50 | miR-430b | 2996 | 1535 | 0   |
| miR-430b | 3273 | 2031 | 0   | miR-430b | 1112 | 996  | -50 | miR-430b | 2948 | 1521 | 0   |
| miR-430c | 2400 | 1965 | -50 | miR-430c | 1158 | 1027 | -50 | miR-430c | 2556 | 1590 | 0   |
| miR-430c | 2743 | 2019 | 0   | miR-430c | 1137 | 1098 | -50 | miR-430c | 2671 | 1540 | 0   |
| miR-44   | 2014 | 2017 | -50 | miR-44   | 993  | 992  | -50 | miR-44   | 2353 | 2339 | -50 |
| miR-44   | 2086 | 2025 | -50 | miR-44   | 967  | 984  | -50 | miR-44   | 2411 | 2375 | -50 |
| miR-448  | 2683 | 1947 | 0   | miR-448  | 1069 | 1013 | -50 | miR-448  | 2294 | 1574 | 0   |
| miR-448  | 2722 | 1971 | 0   | miR-448  | 1067 | 1030 | -50 | miR-448  | 2414 | 1583 | 0   |
| miR-449  | 2913 | 2016 | 0   | miR-449  | 1474 | 1014 | 0   | miR-449  | 3051 | 1560 | 0   |
| miR-449  | 2936 | 2039 | 0   | miR-449  | 1469 | 986  | 0   | miR-449  | 3043 | 1549 | 0   |
| miR-450  | 2876 | 2074 | 0   | miR-450  | 1415 | 1329 | -50 | miR-450  | 2711 | 1578 | 0   |
| miR-450  | 2847 | 2033 | 0   | miR-450  | 1299 | 1228 | -50 | miR-450  | 2779 | 1580 | 0   |
| miR-46   | 1986 | 2018 | -50 | miR-46   | 967  | 967  | -50 | miR-46   | 2836 | 2254 | 0   |
| miR-46   | 2044 | 2065 | -50 | miR-46   | 974  | 960  | -50 | miR-46   | 2460 | 2138 | 0   |
| miR-47   | 1918 | 1931 | -50 | miR-47   | 836  | 888  | -50 | miR-47   | 2693 | 2679 | -50 |
| miR-47   | 1917 | 1948 | -50 | miR-47   | 858  | 881  | -50 | miR-47   | 2488 | 2561 | -50 |
| miR-48   | 1956 | 1984 | -50 | miR-48   | 865  | 878  | -50 | miR-48   | 2412 | 2490 | -50 |
| miR-48   | 1926 | 1961 | -50 | miR-48   | 905  | 888  | 0   | miR-48   | 2626 | 2617 | 0   |
| miR-49   | 3298 | 1978 | 0   | miR-49   | 1082 | 956  | -50 | miR-49   | 5816 | 2557 | 0   |
| miR-49   | 3197 | 1973 | 0   | miR-49   | 1920 | 999  | 0   | miR-49   | 5490 | 2392 | 0   |
| miR-5    | 3059 | 2104 | 0   | miR-5    | 917  | 902  | -50 | miR-5    | 4044 | 2585 | 0   |
| miR-5    | 3078 | 2105 | 0   | miR-5    | 903  | 906  | -50 | miR-5    | 3547 | 2659 | -50 |
| miR-50   | 2068 | 1968 | -50 | miR-50   | 980  | 947  | -50 | miR-50   | 2690 | 2456 | -50 |
| miR-50   | 2031 | 2001 | -50 | miR-50   | 1018 | 965  | -50 | miR-50   | 2699 | 2452 | -50 |
| miR-51   | 1987 | 2049 | -50 | miR-51   | 1001 | 996  | -50 | miR-51   | 2881 | 2374 | 0   |
| miR-51   | 2090 | 2032 | -50 | miR-51   | 1012 | 1006 | -50 | miR-51   | 2556 | 2311 | -50 |
| miR-52   | 3158 | 2052 | 0   | miR-52   | 1059 | 1005 | -50 | miR-52   | 3692 | 2326 | 0   |
| miR-52   | 3152 | 2097 | 0   | miR-52   | 1046 | 1032 | -50 | miR-52   | 3711 | 2327 | 0   |
| miR-53   | 3166 | 2105 | 0   | miR-53   | 1056 | 1037 | -50 | miR-53   | 3578 | 2472 | 0   |
| miR-53   | 3260 | 2073 | 0   | miR-53   | 1051 | 1031 | -50 | miR-53   | 3947 | 2567 | 0   |
| miR-54   | 2011 | 2047 | -50 | miR-54   | 1031 | 1019 | -50 | miR-54   | 2667 | 2605 | -50 |
| miR-54   | 1953 | 2057 | -50 | miR-54   | 1088 | 1038 | -50 | miR-54   | 2880 | 2664 | -50 |
| miR-55   | 2034 | 2059 | -50 | miR-55   | 1011 | 1043 | -50 | miR-55   | 2570 | 2561 | -50 |
| miR-55   | 1976 | 2114 | -50 | miR-55   | 941  | 1007 | -50 | miR-55   | 2509 | 2517 | -50 |
| miR-56*  | 2021 | 2019 | -50 | miR-56*  | 1015 | 984  | -50 | miR-56*  | 2405 | 2349 | -50 |
| miR-56*  | 2016 | 2046 | -50 | miR-56*  | 969  | 966  | -50 | miR-56*  | 2341 | 2257 | -50 |
| miR-56   | 2003 | 2085 | -50 | miR-56   | 981  | 1021 | -50 | miR-56   | 2699 | 2325 | 0   |
| miR-56   | 1952 | 2037 | -50 | miR-56   | 1023 | 977  | -50 | miR-56   | 2710 | 2362 | 0   |
| miR-57   | 2080 | 2073 | -50 | miR-57   | 1091 | 954  | 0   | miR-57   | 2290 | 2174 | -50 |
| miR-57   | 2171 | 2096 | -50 | miR-57   | 921  | 929  | -50 | miR-57   | 2855 | 2278 | 0   |
| miR-58   | 1919 | 1846 | -50 | miR-58   | 881  | 860  | -50 | miR-58   | 2953 | 2652 | 0   |
| miR-58   | 1921 | 1893 | -50 | miR-58   | 892  | 861  | -50 | miR-58   | 3075 | 2604 | 0   |
| miR-59   | 1930 | 1932 | -50 | miR-59   | 887  | 851  | -50 | miR-59   | 2711 | 2503 | -50 |

|        |      |      |     |        |      |      |     |        |      |      |     |
|--------|------|------|-----|--------|------|------|-----|--------|------|------|-----|
| miR-59 | 1877 | 1925 | -50 | miR-59 | 872  | 882  | -50 | miR-59 | 2585 | 2481 | -50 |
| miR-6  | 2100 | 2124 | -50 | miR-6  | 884  | 914  | -50 | miR-6  | 2681 | 2600 | -50 |
| miR-6  | 2122 | 2114 | -50 | miR-6  | 838  | 933  | -50 | miR-6  | 2571 | 2550 | -50 |
| miR-60 | 1947 | 1938 | -50 | miR-60 | 943  | 909  | -50 | miR-60 | 2726 | 2493 | 0   |
| miR-60 | 1947 | 1943 | -50 | miR-60 | 937  | 950  | -50 | miR-60 | 2466 | 2499 | -50 |
| miR-61 | 1870 | 1938 | -50 | miR-61 | 908  | 954  | -50 | miR-61 | 2324 | 2418 | -50 |
| miR-61 | 1927 | 2011 | -50 | miR-61 | 938  | 982  | -50 | miR-61 | 2409 | 2404 | -50 |
| miR-62 | 1894 | 2041 | -50 | miR-62 | 1070 | 1000 | -50 | miR-62 | 2478 | 2336 | -50 |
| miR-62 | 2035 | 2010 | -50 | miR-62 | 1005 | 1000 | -50 | miR-62 | 2165 | 2293 | -50 |
| miR-63 | 2992 | 2046 | 0   | miR-63 | 965  | 1004 | -50 | miR-63 | 3523 | 2297 | 0   |
| miR-63 | 3138 | 2123 | 0   | miR-63 | 975  | 1030 | -50 | miR-63 | 4060 | 2224 | 0   |
| miR-64 | 2424 | 2095 | -50 | miR-64 | 911  | 1022 | -50 | miR-64 | 3112 | 2383 | 0   |
| miR-64 | 2446 | 2045 | -50 | miR-64 | 945  | 1040 | -50 | miR-64 | 3284 | 2429 | 0   |
| miR-65 | 2403 | 2047 | -50 | miR-65 | 1012 | 1010 | -50 | miR-65 | 3654 | 2639 | 0   |
| miR-65 | 2871 | 2070 | 0   | miR-65 | 1083 | 1015 | -50 | miR-65 | 3801 | 2566 | 0   |
| miR-66 | 2900 | 2163 | 0   | miR-66 | 930  | 1013 | -50 | miR-66 | 3172 | 2603 | 0   |
| miR-66 | 2783 | 2087 | 0   | miR-66 | 938  | 1009 | -50 | miR-66 | 2790 | 2411 | -50 |
| miR-67 | 2542 | 2232 | 0   | miR-67 | 1011 | 1015 | -50 | miR-67 | 3358 | 2281 | 0   |
| miR-67 | 2617 | 2022 | 0   | miR-67 | 1061 | 978  | -50 | miR-67 | 3819 | 2340 | 0   |
| miR-68 | 2533 | 2027 | 0   | miR-68 | 952  | 987  | -50 | miR-68 | 2969 | 2264 | 0   |
| miR-68 | 2633 | 2079 | 0   | miR-68 | 995  | 965  | -50 | miR-68 | 2720 | 2230 | -50 |
| miR-69 | 2896 | 2097 | 0   | miR-69 | 929  | 929  | -50 | miR-69 | 2792 | 2299 | 0   |
| miR-69 | 2719 | 2109 | 0   | miR-69 | 936  | 908  | -50 | miR-69 | 2501 | 2281 | -50 |
| miR-7a | 2133 | 2101 | -50 | miR-7a | 919  | 923  | -50 | miR-7a | 3152 | 2522 | -50 |
| miR-7a | 2137 | 2115 | -50 | miR-7a | 901  | 945  | -50 | miR-7a | 2410 | 2486 | -50 |
| miR-70 | 1773 | 1837 | -50 | miR-70 | 884  | 840  | -50 | miR-70 | 2427 | 2562 | -50 |
| miR-70 | 1859 | 1855 | -50 | miR-70 | 823  | 837  | -50 | miR-70 | 3656 | 2646 | 0   |
| miR-71 | 2470 | 1871 | 0   | miR-71 | 795  | 817  | -50 | miR-71 | 3530 | 2471 | 0   |
| miR-71 | 2462 | 1893 | 0   | miR-71 | 853  | 871  | -50 | miR-71 | 3602 | 2378 | 0   |
| miR-72 | 2849 | 1922 | 0   | miR-72 | 938  | 904  | -50 | miR-72 | 3767 | 2426 | 0   |
| miR-72 | 3023 | 1889 | 0   | miR-72 | 974  | 919  | -50 | miR-72 | 3768 | 2566 | 0   |
| miR-73 | 1860 | 1902 | -50 | miR-73 | 985  | 942  | -50 | miR-73 | 2424 | 2373 | 0   |
| miR-73 | 2002 | 1938 | -50 | miR-73 | 1000 | 976  | -50 | miR-73 | 2381 | 2271 | -50 |
| miR-74 | 2706 | 1971 | 0   | miR-74 | 1052 | 1004 | -50 | miR-74 | 3876 | 2242 | 0   |
| miR-74 | 2698 | 1975 | 0   | miR-74 | 1121 | 1022 | 0   | miR-74 | 3702 | 2237 | 0   |
| miR-75 | 2837 | 1998 | 0   | miR-75 | 1004 | 999  | -50 | miR-75 | 3939 | 2247 | 0   |
| miR-75 | 2872 | 2057 | 0   | miR-75 | 923  | 1009 | -50 | miR-75 | 3450 | 2192 | 0   |
| miR-76 | 2761 | 2028 | 0   | miR-76 | 978  | 999  | -50 | miR-76 | 3360 | 2282 | 0   |
| miR-76 | 2716 | 2011 | 0   | miR-76 | 1044 | 995  | -50 | miR-76 | 3042 | 2441 | 0   |
| miR-77 | 2007 | 1994 | -50 | miR-77 | 990  | 986  | -50 | miR-77 | 2450 | 2588 | -50 |
| miR-77 | 2018 | 2019 | -50 | miR-77 | 1109 | 998  | -50 | miR-77 | 2884 | 2539 | -50 |
| miR-78 | 1869 | 2002 | -50 | miR-78 | 1146 | 1003 | 0   | miR-78 | 2399 | 2403 | -50 |
| miR-78 | 1866 | 1982 | -50 | miR-78 | 1038 | 988  | -50 | miR-78 | 2137 | 2307 | -50 |
| miR-79 | 2529 | 2031 | 0   | miR-79 | 962  | 1002 | -50 | miR-79 | 2818 | 2325 | -50 |
| miR-79 | 2588 | 2036 | 0   | miR-79 | 994  | 973  | -50 | miR-79 | 3426 | 2296 | 0   |
| miR-8  | 2139 | 2131 | -50 | miR-8  | 893  | 960  | -50 | miR-8  | 3210 | 2493 | 0   |
| miR-8  | 2223 | 2159 | -50 | miR-8  | 934  | 1000 | -50 | miR-8  | 2870 | 2417 | 0   |
| miR-80 | 2493 | 2020 | -50 | miR-80 | 998  | 988  | -50 | miR-80 | 3285 | 2269 | 0   |
| miR-80 | 2692 | 2049 | 0   | miR-80 | 946  | 958  | -50 | miR-80 | 3137 | 2315 | 0   |

|               |      |      |     |               |      |      |     |               |      |      |     |
|---------------|------|------|-----|---------------|------|------|-----|---------------|------|------|-----|
| miR-81        | 2100 | 2020 | -50 | miR-81        | 963  | 912  | -50 | miR-81        | 2316 | 2194 | -50 |
| miR-81        | 2031 | 2027 | -50 | miR-81        | 1138 | 885  | -50 | miR-81        | 2967 | 2021 | 0   |
| miR-83        | 2993 | 1709 | 0   | miR-83        | 1123 | 893  | -50 | miR-83        | 2736 | 1549 | 0   |
| miR-83        | 2675 | 1732 | 0   | miR-83        | 1208 | 868  | 0   | miR-83        | 2678 | 1471 | 0   |
| miR-84        | 2592 | 1728 | 0   | miR-84        | 920  | 848  | -50 | miR-84        | 2308 | 1466 | 0   |
| miR-84        | 2510 | 1705 | 0   | miR-84        | 932  | 860  | -50 | miR-84        | 2358 | 1463 | 0   |
| miR-85        | 2384 | 1726 | 0   | miR-85        | 934  | 894  | -50 | miR-85        | 2193 | 1421 | 0   |
| miR-85        | 2377 | 1744 | 0   | miR-85        | 985  | 886  | -50 | miR-85        | 2140 | 1429 | 0   |
| miR-86        | 2534 | 1700 | 0   | miR-86        | 923  | 898  | -50 | miR-86        | 2394 | 1424 | 0   |
| miR-86        | 2541 | 1721 | 0   | miR-86        | 911  | 890  | -50 | miR-86        | 2447 | 1466 | 0   |
| miR-87        | 3559 | 1720 | 0   | miR-87        | 1785 | 895  | 0   | miR-87        | 5078 | 1463 | 0   |
| miR-87        | 4150 | 1735 | 0   | miR-87        | 2049 | 921  | 0   | miR-87        | 4821 | 1443 | 0   |
| miR-88        | 3607 | 1772 | 0   | miR-88        | 1279 | 915  | -50 | miR-88        | 3610 | 1459 | 0   |
| miR-88        | 3504 | 1784 | 0   | miR-88        | 1396 | 933  | 0   | miR-88        | 3480 | 1450 | 0   |
| miR-89        | 2596 | 1828 | 0   | miR-89        | 948  | 920  | -50 | miR-89        | 2531 | 1409 | 0   |
| miR-89        | 2806 | 1862 | 0   | miR-89        | 940  | 927  | -50 | miR-89        | 2437 | 1429 | 0   |
| miR-9         | 2205 | 2212 | -50 | miR-9         | 1018 | 1011 | -50 | miR-9         | 2299 | 2377 | -50 |
| miR-9         | 2307 | 2373 | -50 | miR-9         | 1006 | 1017 | -50 | miR-9         | 2314 | 2354 | -50 |
| miR-90        | 4018 | 1806 | 0   | miR-90        | 1478 | 915  | 0   | miR-90        | 3950 | 1424 | 0   |
| miR-90        | 4020 | 1868 | 0   | miR-90        | 1444 | 923  | 0   | miR-90        | 3756 | 1438 | 0   |
| miR-17-5p     | 1791 | 1854 | -50 | miR-17-5p     | 928  | 963  | -50 | miR-17-5p     | 1445 | 1416 | -50 |
| miR-17-5p     | 1900 | 1868 | -50 | miR-17-5p     | 963  | 1002 | -50 | miR-17-5p     | 1520 | 1444 | -50 |
| miR-92        | 4078 | 1855 | 0   | miR-92        | 1975 | 964  | 0   | miR-92        | 3769 | 1469 | 0   |
| miR-92        | 4360 | 1883 | 0   | miR-92        | 1941 | 969  | 0   | miR-92        | 3738 | 1466 | 0   |
| miR-93        | 3242 | 1891 | 0   | miR-93        | 1195 | 978  | 0   | miR-93        | 3100 | 1443 | 0   |
| miR-93        | 3021 | 1901 | 0   | miR-93        | 1305 | 969  | 0   | miR-93        | 3052 | 1454 | 0   |
| miR-94        | 2914 | 1913 | 0   | miR-94        | 1191 | 978  | -50 | miR-94        | 2977 | 1465 | 0   |
| miR-94        | 2894 | 1880 | 0   | miR-94        | 1234 | 979  | 0   | miR-94        | 2970 | 1468 | 0   |
| miR-95        | 2737 | 1738 | 0   | miR-95        | 891  | 895  | -50 | miR-95        | 2557 | 1435 | 0   |
| miR-95        | 2756 | 1748 | 0   | miR-95        | 923  | 867  | -50 | miR-95        | 2462 | 1414 | 0   |
| miR-96        | 2640 | 1711 | 0   | miR-96        | 956  | 830  | -50 | miR-96        | 2629 | 1409 | 0   |
| miR-96        | 2655 | 1704 | 0   | miR-96        | 940  | 846  | -50 | miR-96        | 2815 | 1430 | 0   |
| miR-30a-5p    | 2836 | 1725 | 0   | miR-30a-5p    | 1006 | 896  | -50 | miR-30a-5p    | 3033 | 1395 | 0   |
| miR-30a-5p    | 2868 | 1692 | 0   | miR-30a-5p    | 937  | 921  | -50 | miR-30a-5p    | 3028 | 1397 | 0   |
| miR-98        | 2946 | 1694 | 0   | miR-98        | 1114 | 906  | 0   | miR-98        | 3139 | 1396 | 0   |
| miR-98        | 3011 | 1738 | 0   | miR-98        | 1046 | 892  | -50 | miR-98        | 3024 | 1403 | 0   |
| miR-99a       | 4308 | 1760 | 0   | miR-99a       | 1848 | 887  | 0   | miR-99a       | 4354 | 1440 | 0   |
| miR-99a       | 4237 | 1757 | 0   | miR-99a       | 1805 | 896  | 0   | miR-99a       | 4472 | 1407 | 0   |
| miR-99b       | 3052 | 1809 | 0   | miR-99b       | 1143 | 929  | -50 | miR-99b       | 3236 | 1417 | 0   |
| miR-99b       | 3162 | 1803 | 0   | miR-99b       | 1122 | 927  | -50 | miR-99b       | 3416 | 1406 | 0   |
| PsA-NAD-dehyd | 2727 | 1987 | 0   | PsA-NAD-dehyd | 1028 | 1046 | -50 | PsA-NAD-dehyd | 2740 | 1541 | 0   |
| PsA-NAD-dehyd | 2715 | 2031 | 0   | PsA-NAD-dehyd | 1052 | 1036 | -50 | PsA-NAD-dehyd | 2684 | 1592 | 0   |

### Active Regeneration

|      | F635   | B635   |       | F635 | B635   |        | F635  | B635 |        |        |       |
|------|--------|--------|-------|------|--------|--------|-------|------|--------|--------|-------|
| Name | Median | Median | Flags | Name | Median | Median | Flags | Name | Median | Median | Flags |
| APC  | 3299   | 1068   | 0     | APC  | 7137   | 1680   | 0     | APC  | 4409   | 2625   | 0     |

|              |       |      |     |              |      |      |     |              |       |      |     |
|--------------|-------|------|-----|--------------|------|------|-----|--------------|-------|------|-----|
| APC          | 3114  | 1065 | 0   | APC          | 7057 | 1666 | 0   | APC          | 4412  | 2727 | 0   |
| beta-actin   | 2411  | 1106 | 0   | beta-actin   | 4977 | 1656 | 0   | APC          | 4523  | 2707 | 0   |
| beta-actin   | 2314  | 1139 | 0   | beta-actin   | 4731 | 1632 | 0   | beta-actin   | 4993  | 2795 | 0   |
| beta-catenin | 2282  | 1080 | 0   | beta-catenin | 3731 | 1633 | 0   | beta-actin   | 4978  | 2766 | 0   |
| beta-catenin | 2250  | 1053 | 0   | beta-catenin | 3736 | 1666 | 0   | beta-actin   | 5161  | 2852 | 0   |
| Dr18srRNA    | 54653 | 1049 | 0   | Dr18srRNA    | 2685 | 1478 | 0   | beta-catenin | 7886  | 2606 | 0   |
| Dr18srRNA    | 41678 | 1043 | 0   | Dr18srRNA    | 2639 | 1465 | 0   | beta-catenin | 8030  | 2733 | 0   |
| let7a1long   | 4817  | 1048 | 0   | let7a1long   | 9092 | 1478 | 0   | beta-catenin | 8315  | 2669 | 0   |
| let7a1long   | 4270  | 1072 | 0   | let7a1long   | 9060 | 1469 | 0   | Dr18srRNA    | 7757  | 2676 | 0   |
| let7a1mm2    | 1609  | 1050 | 0   | let7a1mm2    | 2388 | 1462 | 0   | Dr18srRNA    | 6356  | 2432 | 0   |
| let7a1mm2    | 1562  | 1046 | 0   | let7a1mm2    | 2153 | 1467 | 0   | Dr18srRNA    | 7028  | 2645 | 0   |
| let7a1mm6    | 1536  | 1103 | -50 | let7a1mm6    | 2475 | 1559 | 0   | let7a1long   | 24226 | 2611 | 0   |
| let7a1mm6    | 1678  | 1154 | 0   | let7a1mm6    | 2297 | 1566 | 0   | let7a1long   | 25343 | 2641 | 0   |
| let7a1short  | 1717  | 1056 | 0   | let7a1short  | 4924 | 1455 | 0   | let7a1long   | 20163 | 2635 | 0   |
| let7a1short  | 1807  | 1062 | 0   | let7a1short  | 5337 | 1462 | 0   | let7a1mm2    | 4302  | 2639 | 0   |
| let-7b       | 4724  | 1081 | 0   | let-7b       | 3512 | 1099 | 0   | let7a1mm2    | 4829  | 2725 | 0   |
| let-7b       | 4551  | 1073 | 0   | let-7b       | 3360 | 1110 | 0   | let7a1mm2    | 4484  | 2728 | 0   |
| let7c        | 2809  | 1068 | 0   | let7c        | 3674 | 1128 | 0   | let7a1mm6    | 4083  | 2735 | 0   |
| let7c        | 3053  | 1043 | 0   | let7c        | 4462 | 1129 | 0   | let7a1mm6    | 4156  | 2836 | 0   |
| let-7d       | 1127  | 1042 | -50 | let-7d       | 1720 | 1093 | 0   | let7a1mm6    | 4446  | 2732 | 0   |
| let-7d       | 1113  | 1062 | -50 | let-7d       | 1710 | 1151 | 0   | let7a1short  | 24676 | 2621 | 0   |
| let-7e       | 1464  | 1088 | 0   | let-7e       | 2206 | 1090 | 0   | let7a1short  | 24937 | 2487 | 0   |
| let-7e       | 1491  | 1135 | 0   | let-7e       | 2061 | 1091 | 0   | let7a1short  | 23199 | 2625 | 0   |
| let7f        | 1124  | 1145 | -50 | let7f        | 1282 | 1099 | -50 | let-7b       | 3973  | 2113 | 0   |
| let7f        | 1153  | 1123 | -50 | let7f        | 1647 | 1123 | 0   | let-7b       | 4380  | 2061 | 0   |
| let-7g       | 1482  | 1035 | 0   | let-7g       | 2117 | 1120 | 0   | let-7b       | 4037  | 2049 | 0   |
| let-7g       | 1440  | 1033 | 0   | let-7g       | 2129 | 1113 | 0   | let7c        | 7243  | 2163 | 0   |
| mmu-let-7g   | 1861  | 1050 | 0   | mmu-let-7g   | 1675 | 1120 | 0   | let7c        | 8990  | 2051 | 0   |
| mmu-let-7g   | 1897  | 1061 | 0   | mmu-let-7g   | 1701 | 1126 | 0   | let7c        | 6632  | 2085 | 0   |
| let-7i       | 1683  | 1070 | 0   | let-7i       | 1746 | 1136 | 0   | let-7d       | 2742  | 2155 | 0   |
| let-7i       | 1673  | 1108 | 0   | let-7i       | 1866 | 1123 | 0   | let-7d       | 2790  | 2072 | 0   |
| lin4         | 1527  | 1077 | 0   | lin4         | 1867 | 1117 | 0   | let-7d       | 2612  | 2116 | -50 |
| lin4         | 1503  | 1074 | 0   | lin4         | 1899 | 1121 | 0   | let-7e       | 4189  | 2132 | 0   |
| Lycopene     | 1591  | 1054 | 0   | Lycopene     | 2972 | 1442 | 0   | let-7e       | 4179  | 2066 | 0   |
| Lycopene     | 1538  | 1007 | 0   | Lycopene     | 3016 | 1478 | 0   | let-7e       | 4103  | 2087 | 0   |
| miR-1        | 1322  | 1111 | -50 | miR-1        | 1654 | 1114 | 0   | let7f        | 2776  | 2198 | 0   |
| miR-1        | 1466  | 1128 | 0   | miR-1        | 1688 | 1099 | 0   | let7f        | 2723  | 2083 | 0   |
| miR-100      | 1518  | 1085 | 0   | miR-100      | 1822 | 1432 | 0   | let7f        | 2770  | 2106 | 0   |
| miR-100      | 1267  | 1110 | 0   | miR-100      | 1426 | 1425 | 0   | let-7g       | 4583  | 2118 | 0   |
| miR-101a     | 1354  | 1162 | -50 | miR-101a     | 2370 | 1432 | 0   | let-7g       | 5065  | 2090 | 0   |
| miR-101a     | 1299  | 1130 | -50 | miR-101a     | 2223 | 1431 | 0   | let-7g       | 4579  | 2087 | 0   |
| miR-29b      | 1325  | 1089 | 0   | miR-29b      | 2241 | 1426 | 0   | mmu-let-7g   | 3767  | 2198 | 0   |
| miR-29b      | 1231  | 1153 | 0   | miR-29b      | 2260 | 1431 | 0   | mmu-let-7g   | 3926  | 2096 | 0   |
| miR-103      | 1518  | 1061 | 0   | miR-103      | 2826 | 1414 | 0   | mmu-let-7g   | 3811  | 2107 | 0   |



|              |      |      |     |              |      |      |   |          |       |      |   |
|--------------|------|------|-----|--------------|------|------|---|----------|-------|------|---|
| miR-103      | 1557 | 1030 | 0   | miR-103      | 3683 | 1425 | 0 | let-7i   | 3833  | 2139 | 0 |
| miR-21       | 1425 | 1028 | 0   | miR-21       | 2423 | 1422 | 0 | let-7i   | 4036  | 2092 | 0 |
| miR-21       | 1391 | 1007 | 0   | miR-21       | 2331 | 1446 | 0 | let-7i   | 3901  | 2088 | 0 |
| miR-105      | 1300 | 1054 | 0   | miR-105      | 2441 | 1433 | 0 | lin4     | 4795  | 2324 | 0 |
| miR-105      | 1207 | 1058 | -50 | miR-105      | 2555 | 1433 | 0 | lin4     | 7026  | 2707 | 0 |
| miR-106      | 2881 | 1839 | -50 | miR-106      | 5412 | 1460 | 0 | lin4     | 4795  | 2301 | 0 |
| miR-106      | 2612 | 1251 | -50 | miR-106      | 5747 | 1446 | 0 | Lycopene | 5217  | 2612 | 0 |
| miR-107      | 1661 | 1092 | 0   | miR-107      | 3851 | 1426 | 0 | Lycopene | 5542  | 2559 | 0 |
| miR-107      | 1646 | 1076 | 0   | miR-107      | 4114 | 1438 | 0 | Lycopene | 5453  | 2640 | 0 |
| miR-108      | 2241 | 1084 | 0   | miR-108      | 4838 | 1450 | 0 | miR-1    | 5126  | 2638 | 0 |
| miR-108      | 2185 | 1066 | 0   | miR-108      | 4924 | 1446 | 0 | miR-1    | 5221  | 2737 | 0 |
| miR-109      | 2680 | 1084 | 0   | miR-109      | 4473 | 1447 | 0 | miR-1    | 5068  | 2678 | 0 |
| miR-109      | 2522 | 1075 | 0   | miR-109      | 4441 | 1433 | 0 | miR-100  | 4621  | 2464 | 0 |
| miR-10a      | 1409 | 1101 | 0   | miR-10a      | 1922 | 1124 | 0 | miR-100  | 5171  | 2593 | 0 |
| miR-10a      | 1485 | 1104 | 0   | miR-10a      | 1830 | 1154 | 0 | miR-100  | 4767  | 2481 | 0 |
| miR-10b      | 1466 | 1100 | 0   | miR-10b      | 1952 | 1138 | 0 | miR-101a | 4968  | 2682 | 0 |
| miR-10b      | 1471 | 1089 | 0   | miR-10b      | 1878 | 1139 | 0 | miR-101a | 5028  | 2600 | 0 |
| miR-10blong  | 1498 | 1074 | 0   | miR-10blong  | 2900 | 1539 | 0 | miR-101a | 5117  | 2682 | 0 |
| miR-10blong  | 1482 | 1072 | 0   | miR-10blong  | 2870 | 1520 | 0 | miR-29b  | 4299  | 2466 | 0 |
| miR-10b-mm2  | 1451 | 1025 | 0   | miR-10b-mm2  | 2569 | 1427 | 0 | miR-29b  | 4723  | 2577 | 0 |
| miR-10b-mm2  | 1492 | 1078 | 0   | miR-10b-mm2  | 2555 | 1481 | 0 | miR-29b  | 4338  | 2481 | 0 |
| miR-10b-mm6  | 1492 | 1093 | 0   | miR-10b-mm6  | 2718 | 1478 | 0 | miR-103  | 6094  | 2694 | 0 |
| miR-10b-mm6  | 1387 | 1056 | 0   | miR-10b-mm6  | 2838 | 1498 | 0 | miR-103  | 6153  | 2632 | 0 |
| miR-10bshort | 1474 | 1064 | 0   | miR-10bshort | 2876 | 1526 | 0 | miR-103  | 6077  | 2703 | 0 |
| miR-10bshort | 1465 | 1062 | 0   | miR-10bshort | 2935 | 1555 | 0 | miR-21   | 4424  | 2447 | 0 |
| miR-11       | 1574 | 1081 | 0   | miR-11       | 2056 | 1125 | 0 | miR-21   | 4699  | 2554 | 0 |
| miR-11       | 1667 | 1127 | 0   | miR-11       | 2089 | 1104 | 0 | miR-21   | 4560  | 2488 | 0 |
| miR-110      | 2262 | 1096 | 0   | miR-110      | 4609 | 1477 | 0 | miR-105  | 4984  | 2664 | 0 |
| miR-110      | 2374 | 1082 | 0   | miR-110      | 4523 | 1466 | 0 | miR-105  | 5061  | 2645 | 0 |
| miR-19a      | 1127 | 1058 | -50 | miR-19a      | 2485 | 1408 | 0 | miR-105  | 5274  | 2694 | 0 |
| miR-19a      | 1145 | 1068 | -50 | miR-19a      | 2237 | 1459 | 0 | miR-106  | 9119  | 2706 | 0 |
| miR-112      | 1269 | 1114 | -50 | miR-112      | 2559 | 1467 | 0 | miR-106  | 10731 | 2597 | 0 |
| miR-112      | 1292 | 1120 | -50 | miR-112      | 2802 | 1457 | 0 | miR-106  | 8300  | 2755 | 0 |
| miR-113      | 2250 | 1143 | 0   | miR-113      | 5587 | 1448 | 0 | miR-107  | 6999  | 2446 | 0 |
| miR-113      | 2249 | 1168 | 0   | miR-113      | 5281 | 1441 | 0 | miR-107  | 7637  | 2524 | 0 |
| miR-114      | 1285 | 1138 | 0   | miR-114      | 2299 | 1446 | 0 | miR-107  | 6821  | 2469 | 0 |
| miR-114      | 1227 | 1105 | -50 | miR-114      | 2682 | 1450 | 0 | miR-108  | 4756  | 2682 | 0 |
| miR-115      | 1603 | 1116 | 0   | miR-115      | 2260 | 1453 | 0 | miR-108  | 5130  | 2608 | 0 |
| miR-115      | 1583 | 1053 | 0   | miR-115      | 2431 | 1461 | 0 | miR-108  | 4688  | 2699 | 0 |
| miR-116      | 3253 | 1043 | 0   | miR-116      | 2724 | 1441 | 0 | miR-109  | 8285  | 2444 | 0 |
| miR-116      | 3213 | 1016 | 0   | miR-116      | 2852 | 1419 | 0 | miR-109  | 9263  | 2488 | 0 |
| miR-117      | 1290 | 1091 | 0   | miR-117      | 2937 | 1428 | 0 | miR-109  | 8378  | 2472 | 0 |
| miR-117      | 1410 | 1110 | 0   | miR-117      | 2315 | 1433 | 0 | miR-10a  | 3933  | 2179 | 0 |
| miR-118      | 2033 | 1569 | -50 | miR-118      | 2273 | 1499 | 0 | miR-10a  | 3902  | 2106 | 0 |
| miR-118      | 1466 | 1273 | -50 | miR-118      | 2213 | 1522 | 0 | miR-10a  | 3964  | 2095 | 0 |

|               |      |      |     |               |      |      |     |              |      |      |   |
|---------------|------|------|-----|---------------|------|------|-----|--------------|------|------|---|
| miR-119       | 1353 | 1073 | -50 | miR-119       | 2869 | 1465 | 0   | miR-10b      | 3970 | 2088 | 0 |
| miR-119       | 1316 | 1066 | -50 | miR-119       | 3054 | 1476 | 0   | miR-10b      | 4180 | 2078 | 0 |
| miR-12        | 1134 | 1154 | -50 | miR-12        | 1089 | 1106 | -50 | miR-10b      | 3993 | 2047 | 0 |
| miR-12        | 2079 | 1164 | 0   | miR-12        | 1096 | 1095 | -50 | miR-10blong  | 4557 | 2753 | 0 |
| miR-120       | 1798 | 1102 | 0   | miR-120       | 2716 | 1460 | 0   | miR-10blong  | 4638 | 2851 | 0 |
| miR-120       | 1821 | 1110 | 0   | miR-120       | 2868 | 1493 | 0   | miR-10blong  | 4400 | 2803 | 0 |
| miR-121       | 2217 | 1066 | 0   | miR-121       | 3867 | 1486 | 0   | miR-10b-mm2  | 4385 | 2699 | 0 |
| miR-121       | 2205 | 1073 | 0   | miR-121       | 3766 | 1453 | 0   | miR-10b-mm2  | 4572 | 2781 | 0 |
| miR-122       | 3614 | 1109 | 0   | miR-122       | 2840 | 1456 | 0   | miR-10b-mm2  | 4258 | 2718 | 0 |
| miR-122       | 3282 | 1111 | 0   | miR-122       | 2848 | 1477 | 0   | miR-10b-mm6  | 4459 | 2813 | 0 |
| miR-126*      | 5652 | 1063 | 0   | miR-126*      | 6380 | 1454 | 0   | miR-10b-mm6  | 4709 | 2896 | 0 |
| miR-126*      | 4616 | 1079 | 0   | miR-126*      | 6347 | 1501 | 0   | miR-10b-mm6  | 4489 | 2810 | 0 |
| miR-124along  | 1800 | 1079 | 0   | miR-124along  | 2787 | 1609 | 0   | miR-10bshort | 4197 | 2670 | 0 |
| miR-124along  | 1832 | 1091 | 0   | miR-124along  | 2669 | 1598 | 0   | miR-10bshort | 4054 | 2628 | 0 |
| miR-124ashort | 1632 | 1080 | 0   | miR-124ashort | 2451 | 1561 | 0   | miR-10bshort | 4221 | 2680 | 0 |
| miR-124ashort | 1496 | 1108 | 0   | miR-124ashort | 2388 | 1561 | 0   | miR-11       | 4668 | 2194 | 0 |
| miR-124mm2    | 1442 | 1083 | 0   | miR-124mm2    | 2347 | 1423 | 0   | miR-11       | 4740 | 2134 | 0 |
| miR-124mm2    | 1445 | 1065 | 0   | miR-124mm2    | 2231 | 1427 | 0   | miR-11       | 4356 | 2123 | 0 |
| miR-124mm6    | 2102 | 1061 | 0   | miR-124mm6    | 2807 | 1557 | 0   | miR-110      | 5950 | 2688 | 0 |
| miR-124mm6    | 2167 | 1073 | 0   | miR-124mm6    | 2711 | 1526 | 0   | miR-110      | 8171 | 2581 | 0 |
| miR-125a      | 1472 | 1132 | -50 | miR-125a      | 3017 | 1512 | 0   | miR-110      | 6199 | 2669 | 0 |
| miR-125a      | 1509 | 1106 | 0   | miR-125a      | 3075 | 1481 | 0   | miR-19a      | 5626 | 2444 | 0 |
| miR-125b      | 1805 | 1137 | 0   | miR-125b      | 2925 | 1470 | 0   | miR-19a      | 5884 | 2452 | 0 |
| miR-125b      | 1880 | 1180 | 0   | miR-125b      | 3021 | 1471 | 0   | miR-19a      | 5688 | 2464 | 0 |
| miR-126       | 1541 | 1191 | 0   | miR-126       | 2511 | 1517 | 0   | miR-112      | 4771 | 2674 | 0 |
| miR-126       | 1281 | 1127 | -50 | miR-126       | 2471 | 1492 | 0   | miR-112      | 5475 | 2580 | 0 |
| miR-127       | 1838 | 1116 | 0   | miR-127       | 2922 | 1489 | 0   | miR-112      | 4857 | 2658 | 0 |
| miR-127       | 1762 | 1069 | 0   | miR-127       | 3013 | 1475 | 0   | miR-113      | 6896 | 2415 | 0 |
| miR-128b      | 1727 | 1062 | 0   | miR-128b      | 3349 | 1428 | 0   | miR-113      | 7470 | 2429 | 0 |
| miR-128b      | 1734 | 1036 | 0   | miR-128b      | 3325 | 1391 | 0   | miR-113      | 7241 | 2456 | 0 |
| miR-129a      | 2045 | 1039 | 0   | miR-129a      | 3003 | 1438 | 0   | miR-114      | 4517 | 2467 | 0 |
| miR-129a      | 2068 | 1084 | 0   | miR-129a      | 2752 | 1505 | 0   | miR-114      | 4619 | 2534 | 0 |
| miR-129       | 2637 | 1402 | -50 | miR-129       | 3144 | 1568 | 0   | miR-114      | 4459 | 2506 | 0 |
| miR-129       | 2140 | 1093 | 0   | miR-129       | 3162 | 1578 | 0   | miR-115      | 4976 | 2644 | 0 |
| miR-13a       | 1453 | 1146 | 0   | miR-13a       | 1769 | 1083 | 0   | miR-115      | 5072 | 2626 | 0 |
| miR-13a       | 1392 | 1155 | 0   | miR-13a       | 1759 | 1064 | 0   | miR-115      | 4997 | 2664 | 0 |
| miR-130       | 1296 | 1078 | 0   | miR-130       | 2633 | 1550 | 0   | miR-116      | 4895 | 2491 | 0 |
| miR-130       | 1234 | 1075 | -50 | miR-130       | 2373 | 1511 | 0   | miR-116      | 5136 | 2524 | 0 |
| miR-130a      | 1728 | 1136 | 0   | miR-130a      | 2884 | 1726 | 0   | miR-116      | 4958 | 2506 | 0 |
| miR-130a      | 1577 | 1142 | 0   | miR-130a      | 2926 | 1726 | 0   | miR-117      | 5016 | 2633 | 0 |
| miR-130b      | 1469 | 1044 | 0   | miR-130b      | 2702 | 1485 | 0   | miR-117      | 4945 | 2628 | 0 |

|            |      |      |     |            |      |      |     |               |      |      |   |
|------------|------|------|-----|------------|------|------|-----|---------------|------|------|---|
| miR-130b   | 1496 | 1040 | 0   | miR-130b   | 2813 | 1478 | 0   | miR-117       | 5054 | 2652 | 0 |
| miR-9*     | 1182 | 1119 | -50 | miR-9*     | 2340 | 1516 | 0   | miR-118       | 4277 | 2512 | 0 |
| miR-9*     | 1218 | 1144 | -50 | miR-9*     | 2302 | 1522 | 0   | miR-118       | 4338 | 2549 | 0 |
| miR-132    | 1600 | 1119 | 0   | miR-132    | 2537 | 1509 | 0   | miR-118       | 4225 | 2523 | 0 |
| miR-132    | 1554 | 1110 | 0   | miR-132    | 2487 | 1505 | 0   | miR-119       | 4980 | 2587 | 0 |
| miR-133    | 2694 | 1118 | 0   | miR-133    | 7363 | 1514 | 0   | miR-119       | 5086 | 2616 | 0 |
| miR-133    | 2675 | 1133 | 0   | miR-133    | 7394 | 1511 | 0   | miR-119       | 5193 | 2656 | 0 |
| miR-134    | 1626 | 1094 | 0   | miR-134    | 2568 | 1498 | 0   | miR-12        | 2822 | 2068 | 0 |
| miR-134    | 1641 | 1086 | 0   | miR-134    | 2285 | 1498 | 0   | miR-12        | 2870 | 2075 | 0 |
| miR-135a   | 1125 | 1101 | -50 | miR-135a   | 1591 | 1517 | -50 | miR-12        | 2751 | 2005 | 0 |
| miR-135a   | 1142 | 1100 | -50 | miR-135a   | 1587 | 1510 | -50 | miR-120       | 4806 | 2523 | 0 |
| miR-136    | 1510 | 1150 | 0   | miR-136    | 2589 | 1501 | 0   | miR-120       | 4809 | 2561 | 0 |
| miR-136    | 1617 | 1147 | 0   | miR-136    | 2522 | 1524 | 0   | miR-120       | 4833 | 2530 | 0 |
| miR-137    | 1514 | 1175 | 0   | miR-137    | 2637 | 1586 | 0   | miR-121       | 5448 | 2580 | 0 |
| miR-137    | 1436 | 1167 | -50 | miR-137    | 2283 | 1571 | 0   | miR-121       | 5444 | 2614 | 0 |
| miR-138    | 2048 | 1119 | 0   | miR-138    | 3143 | 1530 | 0   | miR-121       | 5596 | 2649 | 0 |
| miR-138    | 2028 | 1095 | 0   | miR-138    | 2847 | 1495 | 0   | miR-122       | 5595 | 2628 | 0 |
| miR-139    | 1920 | 1066 | 0   | miR-139    | 3061 | 1456 | 0   | miR-122       | 5902 | 2614 | 0 |
| miR-139    | 1883 | 1058 | 0   | miR-139    | 2879 | 1461 | 0   | miR-122       | 5614 | 2646 | 0 |
| miR-14     | 1174 | 1152 | -50 | miR-14     | 1149 | 1096 | -50 | miR-126*      | 6155 | 2411 | 0 |
| miR-14     | 1173 | 1187 | -50 | miR-14     | 1208 | 1098 | -50 | miR-126*      | 6662 | 2403 | 0 |
| miR-140*   | 1280 | 1195 | -50 | miR-140*   | 3207 | 1622 | 0   | miR-126*      | 6387 | 2437 | 0 |
| miR-140*   | 1451 | 1137 | 0   | miR-140*   | 3371 | 1617 | 0   | miR-124along  | 4933 | 2906 | 0 |
| miR-140    | 4416 | 1065 | 0   | miR-140    | 8422 | 1531 | 0   | miR-124along  | 4978 | 2878 | 0 |
| miR-140    | 4435 | 1061 | 0   | miR-140    | 8755 | 1547 | 0   | miR-124along  | 5370 | 2904 | 0 |
| miR-141    | 1271 | 1091 | -50 | miR-141    | 2634 | 1674 | 0   | miR-124ashort | 4858 | 2591 | 0 |
| miR-141    | 1261 | 1088 | -50 | miR-141    | 2314 | 1609 | 0   | miR-124ashort | 4708 | 2690 | 0 |
| miR-142-3p | 1655 | 1161 | 0   | miR-142-3p | 2382 | 1553 | 0   | miR-124ashort | 4926 | 2595 | 0 |
| miR-142-3p | 1777 | 1160 | 0   | miR-142-3p | 2627 | 1556 | 0   | miR-124mm2    | 3672 | 2546 | 0 |
| miR-142-5p | 1213 | 1111 | -50 | miR-142-5p | 2412 | 1576 | 0   | miR-124mm2    | 3988 | 2614 | 0 |
| miR-142-5p | 1329 | 1148 | -50 | miR-142-5p | 2246 | 1583 | 0   | miR-124mm2    | 3849 | 2658 | 0 |
| miR-143    | 1302 | 1120 | -50 | miR-143    | 2848 | 1563 | 0   | miR-124mm6    | 4369 | 2762 | 0 |
| miR-143    | 1365 | 1162 | -50 | miR-143    | 2429 | 1560 | 0   | miR-124mm6    | 4034 | 2751 | 0 |
| miR-144    | 1390 | 1118 | -50 | miR-144    | 2488 | 1538 | 0   | miR-124mm6    | 4531 | 2891 | 0 |
| miR-144    | 1341 | 1089 | -50 | miR-144    | 2372 | 1569 | 0   | miR-125a      | 5699 | 2636 | 0 |
| miR-145    | 1781 | 1092 | 0   | miR-145    | 2872 | 1569 | 0   | miR-125a      | 6258 | 2662 | 0 |
| miR-145    | 1625 | 1112 | 0   | miR-145    | 2880 | 1548 | 0   | miR-125a      | 5823 | 2644 | 0 |
| miR-146    | 1609 | 1127 | 0   | miR-146    | 2476 | 1543 | 0   | miR-125b      | 7350 | 2396 | 0 |
| miR-146    | 1563 | 1117 | 0   | miR-146    | 2403 | 1566 | 0   | miR-125b      | 7922 | 2409 | 0 |
| miR-147    | 1350 | 1165 | 0   | miR-147    | 2947 | 1590 | 0   | miR-125b      | 7566 | 2406 | 0 |
| miR-147    | 1442 | 1175 | 0   | miR-147    | 2824 | 1564 | 0   | miR-126       | 6240 | 2640 | 0 |
| miR-148a   | 1644 | 1135 | 0   | miR-148a   | 2780 | 1547 | 0   | miR-126       | 6356 | 2718 | 0 |
| miR-148a   | 1632 | 1150 | 0   | miR-148a   | 2462 | 1530 | 0   | miR-126       | 6190 | 2699 | 0 |

|           |      |      |     |           |      |      |     |          |      |      |   |
|-----------|------|------|-----|-----------|------|------|-----|----------|------|------|---|
| miR-149   | 1961 | 1096 | 0   | miR-149   | 3688 | 1529 | 0   | miR-127  | 6359 | 2398 | 0 |
| miR-149   | 1839 | 1075 | 0   | miR-149   | 3634 | 1562 | 0   | miR-127  | 6319 | 2408 | 0 |
| miR-150   | 1194 | 1044 | -50 | miR-150   | 1812 | 1584 | 0   | miR-127  | 6329 | 2406 | 0 |
| miR-150   | 1175 | 1094 | -50 | miR-150   | 1732 | 1565 | -50 | miR-128b | 5052 | 2614 | 0 |
| miR-151   | 1513 | 1108 | 0   | miR-151   | 3233 | 1676 | 0   | miR-128b | 5114 | 2690 | 0 |
| miR-151   | 1496 | 1136 | 0   | miR-151   | 3164 | 1649 | 0   | miR-128b | 5237 | 2826 | 0 |
| miR-152   | 5587 | 1105 | 0   | miR-152   | 6105 | 1663 | 0   | miR-129a | 6209 | 2471 | 0 |
| miR-152   | 4485 | 1113 | 0   | miR-152   | 6138 | 1628 | 0   | miR-129a | 5922 | 2426 | 0 |
| miR-153   | 1340 | 1132 | -50 | miR-153   | 2459 | 1617 | 0   | miR-129a | 5768 | 2412 | 0 |
| miR-153   | 1414 | 1173 | 0   | miR-153   | 2598 | 1632 | 0   | miR-129  | 4587 | 2540 | 0 |
| miR-154   | 1810 | 1128 | 0   | miR-154   | 2933 | 1614 | 0   | miR-129  | 4707 | 2527 | 0 |
| miR-154   | 1883 | 1127 | 0   | miR-154   | 3256 | 1612 | 0   | miR-129  | 4700 | 2554 | 0 |
| miR-155   | 1386 | 1168 | 0   | miR-155   | 2367 | 1624 | 0   | miR-13a  | 3931 | 2182 | 0 |
| miR-155   | 1357 | 1175 | -50 | miR-155   | 2535 | 1627 | 0   | miR-13a  | 3768 | 2121 | 0 |
| miR-15a   | 1162 | 1076 | -50 | miR-15a   | 1164 | 1140 | -50 | miR-13a  | 3754 | 2119 | 0 |
| miR-15a   | 1097 | 1057 | -50 | miR-15a   | 1334 | 1147 | -50 | miR-130  | 5114 | 2590 | 0 |
| miR-15b   | 1529 | 1047 | 0   | miR-15b   | 1919 | 1113 | 0   | miR-130  | 5320 | 2616 | 0 |
| miR-15b   | 1383 | 1036 | 0   | miR-15b   | 2060 | 1101 | 0   | miR-130  | 5346 | 2633 | 0 |
| miR-16    | 1396 | 1107 | 0   | miR-16    | 1701 | 1127 | 0   | miR-130a | 5220 | 2554 | 0 |
| miR-16    | 1391 | 1071 | 0   | miR-16    | 1767 | 1125 | 0   | miR-130a | 4947 | 2642 | 0 |
| miR-17-3p | 1658 | 1063 | 0   | miR-17-3p | 2096 | 1094 | 0   | miR-130a | 5075 | 2609 | 0 |
| miR-17-3p | 1653 | 1078 | 0   | miR-17-3p | 2122 | 1115 | 0   | miR-130b | 6219 | 2540 | 0 |
| miR-18    | 1069 | 1114 | -50 | miR-18    | 1142 | 1102 | -50 | miR-130b | 6703 | 2520 | 0 |
| miR-18    | 1082 | 1108 | -50 | miR-18    | 1103 | 1107 | -50 | miR-130b | 6201 | 2578 | 0 |
| miR-181a  | 3861 | 1137 | 0   | miR-181a  | 7316 | 1598 | 0   | miR-9*   | 4363 | 2531 | 0 |
| miR-181a  | 3826 | 1105 | 0   | miR-181a  | 7877 | 1660 | 0   | miR-9*   | 4296 | 2508 | 0 |
| miR-182   | 1541 | 1116 | 0   | miR-182   | 2922 | 1686 | 0   | miR-9*   | 4404 | 2567 | 0 |
| miR-182   | 1531 | 1136 | 0   | miR-182   | 2434 | 1595 | 0   | miR-132  | 5057 | 2606 | 0 |
| miR-183   | 1289 | 1117 | -50 | miR-183   | 2482 | 1651 | 0   | miR-132  | 5308 | 2632 | 0 |
| miR-183   | 1328 | 1133 | -50 | miR-183   | 2663 | 1676 | 0   | miR-132  | 5512 | 2617 | 0 |
| miR-184   | 1893 | 1162 | 0   | miR-184   | 2115 | 1639 | 0   | miR-133  | 6098 | 2520 | 0 |
| miR-184   | 1815 | 1175 | 0   | miR-184   | 1953 | 1627 | 0   | miR-133  | 5794 | 2493 | 0 |
| miR-185   | 1616 | 1170 | 0   | miR-185   | 2430 | 1607 | 0   | miR-133  | 5978 | 2545 | 0 |
| miR-185   | 1444 | 1162 | 0   | miR-185   | 2514 | 1611 | 0   | miR-134  | 4782 | 2600 | 0 |
| miR-186   | 1508 | 1078 | 0   | miR-186   | 3468 | 1643 | 0   | miR-134  | 4814 | 2643 | 0 |
| miR-186   | 1593 | 1079 | 0   | miR-186   | 3165 | 1642 | 0   | miR-134  | 4745 | 2641 | 0 |
| miR-187   | 1839 | 1029 | 0   | miR-187   | 2494 | 1597 | 0   | miR-135a | 3119 | 2577 | 0 |
| miR-187   | 1756 | 1041 | 0   | miR-187   | 2748 | 1622 | 0   | miR-135a | 3070 | 2480 | 0 |
| miR-188   | 1579 | 1112 | 0   | miR-188   | 2556 | 1752 | 0   | miR-135a | 3094 | 2555 | 0 |
| miR-188   | 1485 | 1112 | 0   | miR-188   | 2694 | 1727 | 0   | miR-136  | 4993 | 2582 | 0 |
| miR-189   | 1539 | 1110 | 0   | miR-189   | 3099 | 1718 | 0   | miR-136  | 5125 | 2666 | 0 |
| miR-189   | 1677 | 1107 | 0   | miR-189   | 3374 | 1697 | 0   | miR-136  | 5234 | 2620 | 0 |
| miR-19    | 1062 | 1076 | -50 | miR-19    | 1182 | 1121 | -50 | miR-137  | 4490 | 2578 | 0 |
| miR-19    | 1052 | 1091 | -50 | miR-19    | 1118 | 1096 | -50 | miR-137  | 4532 | 2680 | 0 |
| miR-190   | 1479 | 1135 | 0   | miR-190   | 2633 | 1701 | 0   | miR-137  | 4748 | 2980 | 0 |
| miR-190   | 1350 | 1106 | 0   | miR-190   | 2332 | 1679 | 0   | miR-138  | 6132 | 2434 | 0 |
| miR-191   | 1384 | 1091 | 0   | miR-191   | 3098 | 1679 | 0   | miR-138  | 6101 | 2409 | 0 |
| miR-191   | 1415 | 1116 | 0   | miR-191   | 3205 | 1660 | 0   | miR-138  | 6295 | 2424 | 0 |
| miR-192   | 1582 | 1143 | 0   | miR-192   | 3614 | 1678 | 0   | miR-139  | 5330 | 2590 | 0 |

|          |      |      |     |          |       |      |     |            |      |      |   |
|----------|------|------|-----|----------|-------|------|-----|------------|------|------|---|
| miR-192  | 1526 | 1192 | 0   | miR-192  | 3526  | 1660 | 0   | miR-139    | 5631 | 2648 | 0 |
| miR-193  | 1568 | 1181 | 0   | miR-193  | 6168  | 1657 | 0   | miR-139    | 5546 | 2998 | 0 |
| miR-193  | 1440 | 1161 | 0   | miR-193  | 6947  | 1677 | 0   | miR-14     | 2779 | 2070 | 0 |
| miR-194  | 1531 | 1125 | 0   | miR-194  | 2875  | 1652 | 0   | miR-14     | 2730 | 2065 | 0 |
| miR-194  | 1583 | 1106 | 0   | miR-194  | 2742  | 1650 | 0   | miR-14     | 2763 | 1977 | 0 |
| miR-195  | 1256 | 1108 | -50 | miR-195  | 2893  | 1691 | 0   | miR-140*   | 4613 | 2577 | 0 |
| miR-195  | 1322 | 1147 | -50 | miR-195  | 3122  | 1706 | 0   | miR-140*   | 4633 | 2617 | 0 |
| miR-196a | 1777 | 1142 | 0   | miR-196a | 2974  | 1723 | 0   | miR-140*   | 4632 | 2844 | 0 |
| miR-196a | 1765 | 1159 | 0   | miR-196a | 2633  | 1681 | 0   | miR-140    | 6151 | 2395 | 0 |
| miR-197  | 2547 | 1193 | 0   | miR-197  | 3888  | 1700 | 0   | miR-140    | 6032 | 2413 | 0 |
| miR-197  | 2486 | 1166 | 0   | miR-197  | 3621  | 1679 | 0   | miR-140    | 6239 | 2419 | 0 |
| miR-198  | 4033 | 1097 | 0   | miR-198  | 4810  | 1675 | 0   | miR-141    | 5748 | 2416 | 0 |
| miR-198  | 3249 | 1072 | 0   | miR-198  | 5078  | 1661 | 0   | miR-141    | 5785 | 2396 | 0 |
| miR-199* | 1130 | 1174 | -50 | miR-199* | 1135  | 1104 | -50 | miR-141    | 5776 | 2429 | 0 |
| miR-199* | 1047 | 1134 | -50 | miR-199* | 1444  | 1154 | 0   | miR-142-3p | 6210 | 2422 | 0 |
| miR-199  | 2259 | 1054 | 0   | miR-199  | 5377  | 1659 | 0   | miR-142-3p | 5833 | 2458 | 0 |
| miR-199  | 2262 | 1047 | 0   | miR-199  | 5381  | 1672 | 0   | miR-142-3p | 6466 | 2402 | 0 |
| miR-2a   | 1111 | 1146 | -50 | miR-2a   | 1132  | 1096 | -50 | miR-142-5p | 4706 | 2563 | 0 |
| miR-2a   | 1151 | 1156 | -50 | miR-2a   | 1151  | 1098 | -50 | miR-142-5p | 4403 | 2616 | 0 |
| miR-20a  | 2264 | 1081 | 0   | miR-20a  | 2677  | 1110 | 0   | miR-142-5p | 4773 | 2720 | 0 |
| miR-20a  | 2300 | 1084 | 0   | miR-20a  | 2864  | 1120 | 0   | miR-143    | 4413 | 2545 | 0 |
| miR-200b | 2021 | 1066 | 0   | miR-200b | 3115  | 1146 | 0   | miR-143    | 4104 | 2454 | 0 |
| miR-200b | 2254 | 1071 | 0   | miR-200b | 3498  | 1169 | 0   | miR-143    | 4476 | 2564 | 0 |
| miR-200c | 1474 | 1039 | 0   | miR-200c | 2664  | 1441 | 0   | miR-144    | 4887 | 2595 | 0 |
| miR-200c | 1516 | 1017 | 0   | miR-200c | 2864  | 1423 | 0   | miR-144    | 5018 | 2682 | 0 |
| miR-201  | 1736 | 1079 | 0   | miR-201  | 1936  | 1162 | 0   | miR-144    | 5112 | 2631 | 0 |
| miR-201  | 1677 | 1093 | 0   | miR-201  | 2031  | 1154 | 0   | miR-145    | 5598 | 2580 | 0 |
| miR-202  | 1377 | 1096 | 0   | miR-202  | 2049  | 1172 | 0   | miR-145    | 5306 | 2437 | 0 |
| miR-202  | 1389 | 1086 | 0   | miR-202  | 2109  | 1170 | 0   | miR-145    | 5799 | 2587 | 0 |
| miR-203  | 1121 | 1077 | 0   | miR-203  | 1211  | 1144 | 0   | miR-146    | 4967 | 2578 | 0 |
| miR-203  | 1134 | 1093 | 0   | miR-203  | 1224  | 1148 | 0   | miR-146    | 5044 | 2705 | 0 |
| miR-204  | 1856 | 1086 | 0   | miR-204  | 2006  | 1148 | 0   | miR-146    | 5155 | 2597 | 0 |
| miR-204  | 1899 | 1085 | 0   | miR-204  | 2143  | 1149 | 0   | miR-147    | 5144 | 2594 | 0 |
| miR-205  | 5943 | 1106 | 0   | miR-205  | 9021  | 1156 | 0   | miR-147    | 5181 | 2473 | 0 |
| miR-205  | 6810 | 1113 | 0   | miR-205  | 10763 | 1130 | 0   | miR-147    | 5247 | 2598 | 0 |
| miR-206  | 8083 | 1141 | 0   | miR-206  | 1850  | 1138 | 0   | miR-148a   | 5013 | 2596 | 0 |
| miR-206  | 6906 | 1159 | 0   | miR-206  | 1800  | 1149 | 0   | miR-148a   | 5111 | 2689 | 0 |
| miR-207  | 3467 | 1165 | 0   | miR-207  | 3438  | 1149 | 0   | miR-148a   | 5243 | 2607 | 0 |
| miR-207  | 3438 | 1150 | 0   | miR-207  | 3577  | 1124 | 0   | miR-149    | 5483 | 2604 | 0 |
| miR-208  | 1483 | 1186 | 0   | miR-208  | 2232  | 1134 | 0   | miR-149    | 5393 | 2457 | 0 |
| miR-208  | 1524 | 1157 | -50 | miR-208  | 2076  | 1145 | 0   | miR-149    | 5439 | 2605 | 0 |
| miR-21   | 1218 | 1107 | 0   | miR-21   | 1236  | 1102 | -50 | miR-150    | 3216 | 2574 | 0 |
| miR-21   | 1231 | 1139 | -50 | miR-21   | 1223  | 1094 | -50 | miR-150    | 3335 | 2720 | 0 |
| miR-210  | 4575 | 1432 | 0   | miR-210  | 2721  | 1132 | 0   | miR-150    | 3312 | 2601 | 0 |
| miR-210  | 5032 | 1976 | 0   | miR-210  | 2703  | 1125 | 0   | miR-151    | 5787 | 2536 | 0 |
| miR-211  | 3861 | 2204 | 0   | miR-211  | 2685  | 1118 | 0   | miR-151    | 5134 | 2675 | 0 |

|              |       |      |     |              |      |      |     |           |       |      |   |
|--------------|-------|------|-----|--------------|------|------|-----|-----------|-------|------|---|
| miR-211      | 3352  | 2120 | 0   | miR-211      | 2664 | 1144 | 0   | miR-151   | 6142  | 2629 | 0 |
| miR-212      | 1133  | 1135 | -50 | miR-212      | 1138 | 1121 | -50 | miR-152   | 6374  | 2442 | 0 |
| miR-212      | 1114  | 1133 | -50 | miR-212      | 1166 | 1152 | -50 | miR-152   | 6234  | 2451 | 0 |
| miR-181a*    | 1628  | 1099 | 0   | miR-181a*    | 6057 | 1174 | 0   | miR-152   | 6440  | 2420 | 0 |
| miR-181a*    | 1706  | 1094 | 0   | miR-181a*    | 6137 | 1156 | 0   | miR-153   | 4913  | 2521 | 0 |
| miR-214      | 14310 | 1095 | 0   | miR-214      | 4082 | 1155 | 0   | miR-153   | 4346  | 2665 | 0 |
| miR-214      | 13329 | 1116 | 0   | miR-214      | 4859 | 1168 | 0   | miR-153   | 4941  | 2594 | 0 |
| miR-215      | 1611  | 1106 | 0   | miR-215      | 1941 | 1167 | 0   | miR-154   | 6790  | 2443 | 0 |
| miR-215      | 1519  | 1115 | 0   | miR-215      | 1901 | 1175 | 0   | miR-154   | 6230  | 2444 | 0 |
| miR-216      | 1968  | 1089 | 0   | miR-216      | 2362 | 1177 | 0   | miR-154   | 6641  | 2462 | 0 |
| miR-216      | 1355  | 1107 | 0   | miR-216      | 2387 | 1144 | 0   | miR-155   | 5110  | 2550 | 0 |
| miR-217      | 1357  | 1121 | -50 | miR-217      | 1735 | 1139 | 0   | miR-155   | 4443  | 2690 | 0 |
| miR-217      | 1324  | 1118 | -50 | miR-217      | 1729 | 1136 | 0   | miR-155   | 5264  | 2620 | 0 |
| miR-218      | 1675  | 1136 | 0   | miR-218      | 1931 | 1199 | 0   | miR-15a   | 3125  | 2480 | 0 |
| miR-218      | 1681  | 1118 | 0   | miR-218      | 1908 | 1152 | 0   | miR-15a   | 3652  | 2764 | 0 |
| miR-219      | 1660  | 1155 | 0   | miR-219      | 1783 | 1125 | 0   | miR-15a   | 3116  | 2476 | 0 |
| miR-219      | 1639  | 1158 | 0   | miR-219      | 1942 | 1131 | 0   | miR-15b   | 6446  | 2661 | 0 |
| miR-22b      | 1171  | 1117 | -50 | miR-22b      | 1169 | 1088 | -50 | miR-15b   | 6333  | 2792 | 0 |
| miR-22b      | 1110  | 1101 | -50 | miR-22b      | 1205 | 1087 | -50 | miR-15b   | 6264  | 2703 | 0 |
| miR-220      | 1220  | 1188 | -50 | miR-220      | 1130 | 1137 | -50 | miR-16    | 4433  | 2498 | 0 |
| miR-220      | 1178  | 1175 | -50 | miR-220      | 1165 | 1139 | -50 | miR-16    | 5491  | 2767 | 0 |
| miR-221      | 2302  | 1147 | 0   | miR-221      | 2798 | 1133 | 0   | miR-16    | 4280  | 2514 | 0 |
| miR-221      | 2327  | 1160 | 0   | miR-221      | 3002 | 1118 | 0   | miR-17-3p | 7915  | 2642 | 0 |
| miR-222      | 4244  | 1280 | 0   | miR-222      | 3217 | 1106 | 0   | miR-17-3p | 7170  | 2779 | 0 |
| miR-222      | 3030  | 1709 | 0   | miR-222      | 3436 | 1115 | 0   | miR-17-3p | 7988  | 2669 | 0 |
| miR-223      | 2653  | 1914 | 0   | miR-223      | 2958 | 1127 | 0   | miR-18    | 3042  | 2493 | 0 |
| miR-223      | 2523  | 1770 | 0   | miR-223      | 2959 | 1146 | 0   | miR-18    | 3534  | 2787 | 0 |
| miR-224      | 1604  | 1119 | 0   | miR-224      | 1718 | 1135 | 0   | miR-18    | 3093  | 2508 | 0 |
| miR-224      | 1614  | 1103 | 0   | miR-224      | 1789 | 1145 | 0   | miR-181a  | 11812 | 2486 | 0 |
| miR-26ashort | 7486  | 1088 | 0   | miR-26ashort | 6499 | 1529 | 0   | miR-181a  | 12681 | 2456 | 0 |
| miR-26ashort | 7536  | 1093 | 0   | miR-26ashort | 6637 | 1537 | 0   | miR-181a  | 10503 | 2504 | 0 |
| miR-23a      | 1105  | 1110 | -50 | miR-23a      | 1134 | 1088 | -50 | miR-182   | 5435  | 2531 | 0 |
| miR-23a      | 1125  | 1148 | -50 | miR-23a      | 1144 | 1066 | -50 | miR-182   | 4691  | 2741 | 0 |
| miR-23b      | 1124  | 1138 | -50 | miR-23b      | 1091 | 1090 | -50 | miR-182   | 5713  | 2607 | 0 |
| miR-23b      | 1132  | 1134 | -50 | miR-23b      | 1138 | 1085 | -50 | miR-183   | 6172  | 2498 | 0 |
| miR-24       | 1092  | 1151 | -50 | miR-24       | 1106 | 1105 | -50 | miR-183   | 5738  | 2466 | 0 |
| miR-24       | 1200  | 1170 | -50 | miR-24       | 1157 | 1128 | -50 | miR-183   | 6185  | 2533 | 0 |
| miR-25       | 1556  | 1065 | 0   | miR-25       | 1887 | 1134 | 0   | miR-184   | 4434  | 2615 | 0 |
| miR-25       | 1734  | 1057 | 0   | miR-25       | 1933 | 1122 | 0   | miR-184   | 4601  | 2448 | 0 |
| miR-263b     | 1761  | 1115 | 0   | miR-263b     | 2247 | 1153 | 0   | miR-184   | 4748  | 2766 | 0 |
| miR-263b     | 1748  | 1132 | 0   | miR-263b     | 2270 | 1149 | 0   | miR-185   | 5084  | 2572 | 0 |
| miR-26along  | 1414  | 1103 | 0   | miR-26along  | 2729 | 1581 | 0   | miR-185   | 5339  | 2710 | 0 |
| miR-26along  | 1435  | 1095 | 0   | miR-26along  | 2669 | 1600 | 0   | miR-185   | 5195  | 2566 | 0 |
| miR-26mm2    | 1524  | 1080 | 0   | miR-26mm2    | 2250 | 1422 | 0   | miR-186   | 4657  | 2590 | 0 |
| miR-26mm2    | 1425  | 1048 | 0   | miR-26mm2    | 2215 | 1454 | 0   | miR-186   | 4454  | 2398 | 0 |
| miR-26mm6    | 1518  | 1062 | 0   | miR-26mm6    | 2250 | 1545 | 0   | miR-186   | 4975  | 2850 | 0 |

|             |      |      |     |             |      |      |     |          |       |      |     |
|-------------|------|------|-----|-------------|------|------|-----|----------|-------|------|-----|
| miR-26mm6   | 1520 | 1089 | 0   | miR-26mm6   | 2442 | 1560 | 0   | miR-187  | 5272  | 2571 | 0   |
| miR-275     | 1927 | 1138 | 0   | miR-275     | 2264 | 1167 | 0   | miR-187  | 5280  | 2723 | 0   |
| miR-275     | 2040 | 1122 | 0   | miR-275     | 2413 | 1183 | 0   | miR-187  | 5427  | 2590 | 0   |
| miR-276b    | 1455 | 1099 | 0   | miR-276b    | 1743 | 1180 | 0   | miR-188  | 5332  | 2599 | 0   |
| miR-276b    | 1467 | 1101 | 0   | miR-276b    | 1741 | 1174 | 0   | miR-188  | 4253  | 2335 | 0   |
| miR-277     | 1460 | 1095 | 0   | miR-277     | 1506 | 1174 | 0   | miR-188  | 2636  | 2708 | -50 |
| miR-277     | 1553 | 1093 | 0   | miR-277     | 1737 | 1140 | 0   | miR-189  | 5025  | 2574 | 0   |
| miR-278     | 2016 | 1100 | 0   | miR-278     | 1865 | 1171 | 0   | miR-189  | 5190  | 2730 | 0   |
| miR-278     | 1866 | 1124 | 0   | miR-278     | 2041 | 1158 | 0   | miR-189  | 5247  | 2574 | 0   |
| miR-279     | 1292 | 1136 | -50 | miR-279     | 1750 | 1161 | 0   | miR-19   | 3534  | 2623 | 0   |
| miR-279     | 1300 | 1144 | -50 | miR-279     | 1801 | 1189 | 0   | miR-19   | 3561  | 2765 | 0   |
| miR-27a     | 1084 | 1075 | -50 | miR-27a     | 1212 | 1114 | -50 | miR-19   | 3552  | 2625 | 0   |
| miR-27a     | 1074 | 1079 | -50 | miR-27a     | 1205 | 1131 | -50 | miR-190  | 4275  | 2641 | 0   |
| miR-27b     | 1536 | 1065 | 0   | miR-27b     | 1841 | 1122 | 0   | miR-190  | 3836  | 2330 | 0   |
| miR-27b     | 1505 | 1071 | 0   | miR-27b     | 1888 | 1116 | 0   | miR-190  | 4346  | 2660 | 0   |
| miR-28      | 1159 | 1076 | -50 | miR-28      | 1172 | 1108 | -50 | miR-191  | 4954  | 2625 | 0   |
| miR-28      | 1157 | 1083 | -50 | miR-28      | 1133 | 1112 | -50 | miR-191  | 5090  | 2715 | 0   |
| miR-281     | 1473 | 1129 | 0   | miR-281     | 1845 | 1134 | 0   | miR-191  | 5297  | 2601 | 0   |
| miR-281     | 1507 | 1135 | 0   | miR-281     | 1778 | 1156 | 0   | miR-192  | 5553  | 2572 | 0   |
| miR-283     | 1480 | 1168 | -50 | miR-283     | 1648 | 1136 | 0   | miR-192  | 4814  | 2726 | 0   |
| miR-283     | 1506 | 1165 | -50 | miR-283     | 1666 | 1139 | 0   | miR-192  | 6019  | 2607 | 0   |
| miR-285     | 1713 | 1174 | 0   | miR-285     | 1750 | 1160 | 0   | miR-193  | 8053  | 2522 | 0   |
| miR-285     | 1621 | 1171 | 0   | miR-285     | 1806 | 1123 | 0   | miR-193  | 7704  | 2487 | 0   |
| miR-286     | 1679 | 1206 | 0   | miR-286     | 1658 | 1109 | 0   | miR-193  | 8490  | 2563 | 0   |
| miR-286     | 1796 | 1247 | 0   | miR-286     | 1707 | 1115 | 0   | miR-194  | 4624  | 2565 | 0   |
| miR-290     | 2144 | 1410 | 0   | miR-290     | 2251 | 1147 | 0   | miR-194  | 4223  | 2733 | 0   |
| miR-290     | 1951 | 1321 | 0   | miR-290     | 2494 | 1115 | 0   | miR-194  | 5125  | 2615 | 0   |
| miR-291a-3p | 2020 | 1147 | 0   | miR-291a-3p | 2135 | 1147 | 0   | miR-195  | 5594  | 2565 | 0   |
| miR-291a-3p | 2066 | 1140 | 0   | miR-291a-3p | 2144 | 1155 | 0   | miR-195  | 5078  | 2519 | 0   |
| miR-291-5p  | 2153 | 1121 | 0   | miR-291-5p  | 2398 | 1128 | 0   | miR-195  | 5582  | 2630 | 0   |
| miR-291-5p  | 2080 | 1127 | 0   | miR-291-5p  | 2482 | 1147 | 0   | miR-196a | 5204  | 2593 | 0   |
| miR-292-3p  | 1658 | 1135 | 0   | miR-292-3p  | 1758 | 1154 | 0   | miR-196a | 4664  | 2732 | 0   |
| miR-292-3p  | 1572 | 1119 | 0   | miR-292-3p  | 1832 | 1136 | 0   | miR-196a | 5406  | 2613 | 0   |
| miR-292-5p  | 1829 | 1137 | 0   | miR-292-5p  | 1957 | 1144 | 0   | miR-197  | 7367  | 2615 | 0   |
| miR-292-5p  | 1828 | 1107 | 0   | miR-292-5p  | 1883 | 1168 | 0   | miR-197  | 6162  | 2536 | 0   |
| miR-293     | 1766 | 1107 | 0   | miR-293     | 1699 | 1149 | 0   | miR-197  | 7944  | 2673 | 0   |
| miR-293     | 1767 | 1117 | 0   | miR-293     | 1692 | 1139 | 0   | miR-198  | 5506  | 2579 | 0   |
| miR-294     | 2148 | 1128 | 0   | miR-294     | 1807 | 1157 | 0   | miR-198  | 5018  | 2643 | 0   |
| miR-294     | 2063 | 1123 | 0   | miR-294     | 1832 | 1179 | 0   | miR-198  | 5639  | 2588 | 0   |
| miR-295     | 1751 | 1128 | 0   | miR-295     | 1767 | 1172 | 0   | miR-199* | 2774  | 2151 | 0   |
| miR-295     | 1651 | 1155 | 0   | miR-295     | 1816 | 1144 | 0   | miR-199* | 2990  | 2173 | 0   |
| miR-296     | 3220 | 1144 | 0   | miR-296     | 6533 | 1153 | 0   | miR-199* | 2735  | 2087 | 0   |
| miR-296     | 3350 | 1138 | 0   | miR-296     | 6660 | 1123 | 0   | miR-199  | 13076 | 2608 | 0   |
| miR-297     | 3381 | 1163 | 0   | miR-297     | 2043 | 1114 | 0   | miR-199  | 12647 | 2559 | 0   |
| miR-297     | 3315 | 1183 | 0   | miR-297     | 1953 | 1127 | 0   | miR-199  | 14174 | 2624 | 0   |

|           |      |      |     |           |      |      |     |           |      |      |   |
|-----------|------|------|-----|-----------|------|------|-----|-----------|------|------|---|
| miR-298   | 2183 | 1187 | 0   | miR-298   | 1944 | 1115 | 0   | miR-2a    | 2878 | 2354 | 0 |
| miR-298   | 2376 | 1170 | 0   | miR-298   | 1981 | 1125 | 0   | miR-2a    | 3384 | 2715 | 0 |
| miR-299   | 1576 | 1191 | 0   | miR-299   | 1819 | 1130 | 0   | miR-2a    | 2994 | 2350 | 0 |
| miR-299   | 1744 | 1174 | 0   | miR-299   | 1929 | 1137 | 0   | miR-20a   | 6179 | 2497 | 0 |
| miR-29a   | 1379 | 1089 | -50 | miR-29a   | 1685 | 1129 | 0   | miR-20a   | 7526 | 2778 | 0 |
| miR-29a   | 1287 | 1140 | 0   | miR-29a   | 1798 | 1136 | 0   | miR-20a   | 5754 | 2528 | 0 |
| miR-29b   | 1073 | 1066 | -50 | miR-29b   | 1146 | 1112 | -50 | miR-200b  | 7013 | 2118 | 0 |
| miR-29b   | 1077 | 1049 | -50 | miR-29b   | 1206 | 1094 | -50 | miR-200b  | 7921 | 2258 | 0 |
| miR-29c   | 1024 | 1053 | -50 | miR-29c   | 1130 | 1108 | -50 | miR-200b  | 6380 | 2068 | 0 |
| miR-29c   | 1243 | 1085 | 0   | miR-29c   | 1151 | 1123 | -50 | miR-200c  | 5332 | 2649 | 0 |
| miR-3     | 1120 | 1143 | -50 | miR-3     | 1421 | 1107 | 0   | miR-200c  | 5272 | 2467 | 0 |
| miR-3     | 1055 | 1147 | -50 | miR-3     | 1111 | 1106 | -50 | miR-200c  | 5661 | 2648 | 0 |
| miR-300   | 1549 | 1195 | -50 | miR-300   | 1787 | 1134 | 0   | miR-201   | 3444 | 2176 | 0 |
| miR-300   | 1615 | 1211 | 0   | miR-300   | 1768 | 1132 | 0   | miR-201   | 3777 | 2169 | 0 |
| miR-301   | 1382 | 1138 | 0   | miR-301   | 1654 | 1146 | 0   | miR-201   | 3570 | 2107 | 0 |
| miR-301   | 1381 | 1170 | 0   | miR-301   | 1855 | 1185 | 0   | miR-202   | 3966 | 2185 | 0 |
| miR-302   | 1447 | 1169 | 0   | miR-302   | 1711 | 1142 | 0   | miR-202   | 4098 | 2221 | 0 |
| miR-302   | 1496 | 1149 | 0   | miR-302   | 1716 | 1140 | 0   | miR-202   | 3967 | 2072 | 0 |
| miR-303   | 1516 | 1109 | 0   | miR-303   | 1542 | 1149 | 0   | miR-203   | 4603 | 2169 | 0 |
| miR-303   | 1495 | 1081 | 0   | miR-303   | 1649 | 1171 | 0   | miR-203   | 5020 | 2136 | 0 |
| miR-304   | 1352 | 1091 | 0   | miR-304   | 1561 | 1155 | -50 | miR-203   | 4633 | 2097 | 0 |
| miR-304   | 1261 | 1105 | -50 | miR-304   | 1493 | 1166 | -50 | miR-204   | 4740 | 2174 | 0 |
| miR-305   | 1528 | 1115 | 0   | miR-305   | 1859 | 1150 | 0   | miR-204   | 4884 | 2217 | 0 |
| miR-305   | 1649 | 1114 | 0   | miR-305   | 1738 | 1125 | 0   | miR-204   | 5014 | 2071 | 0 |
| miR-306   | 1424 | 1110 | 0   | miR-306   | 1637 | 1106 | 0   | miR-205   | 7368 | 2166 | 0 |
| miR-306   | 1492 | 1103 | 0   | miR-306   | 1545 | 1160 | -50 | miR-205   | 9126 | 2150 | 0 |
| miR-307   | 1585 | 1123 | 0   | miR-307   | 1886 | 1182 | 0   | miR-205   | 8201 | 2118 | 0 |
| miR-307   | 1580 | 1126 | 0   | miR-307   | 1724 | 1165 | 0   | miR-206   | 5011 | 2213 | 0 |
| miR-308   | 1358 | 1151 | -50 | miR-308   | 1680 | 1184 | 0   | miR-206   | 5288 | 2247 | 0 |
| miR-308   | 1346 | 1153 | -50 | miR-308   | 1521 | 1154 | -50 | miR-206   | 4976 | 2103 | 0 |
| miR-309   | 1405 | 1190 | -50 | miR-309   | 1598 | 1197 | 0   | miR-207   | 8208 | 2692 | 0 |
| miR-309   | 1426 | 1196 | -50 | miR-309   | 1611 | 1145 | 0   | miR-207   | 8051 | 2647 | 0 |
| miR-30-as | 1470 | 1097 | 0   | miR-30-as | 1681 | 1104 | 0   | miR-207   | 8075 | 2751 | 0 |
| miR-30-as | 1510 | 1087 | 0   | miR-30-as | 1744 | 1102 | 0   | miR-208   | 5448 | 2737 | 0 |
| miR-30a-s | 1109 | 1122 | -50 | miR-30a-s | 1109 | 1130 | -50 | miR-208   | 5326 | 2602 | 0 |
| miR-30a-s | 1203 | 1147 | -50 | miR-30a-s | 1125 | 1107 | -50 | miR-208   | 5348 | 2768 | 0 |
| miR-31    | 1461 | 1102 | 0   | miR-31    | 1750 | 1092 | 0   | miR-21    | 3622 | 2627 | 0 |
| miR-31    | 1492 | 1173 | 0   | miR-31    | 1684 | 1094 | 0   | miR-21    | 3642 | 2732 | 0 |
| miR-310   | 1912 | 1178 | 0   | miR-310   | 2046 | 1099 | 0   | miR-21    | 3567 | 2633 | 0 |
| miR-310   | 1859 | 1137 | 0   | miR-310   | 1871 | 1134 | 0   | miR-210   | 8227 | 2699 | 0 |
| miR-311   | 1748 | 1167 | 0   | miR-311   | 1880 | 1148 | 0   | miR-210   | 7590 | 2656 | 0 |
| miR-311   | 1769 | 1163 | 0   | miR-311   | 1668 | 1140 | 0   | miR-210   | 8197 | 2760 | 0 |
| miR-312   | 1764 | 1209 | 0   | miR-312   | 1649 | 1123 | 0   | miR-211   | 6867 | 2738 | 0 |
| miR-312   | 1837 | 1206 | 0   | miR-312   | 1623 | 1121 | 0   | miR-211   | 8287 | 2549 | 0 |
| miR-313   | 1620 | 1096 | 0   | miR-313   | 2250 | 1156 | 0   | miR-211   | 6715 | 2753 | 0 |
| miR-313   | 1635 | 1108 | 0   | miR-313   | 2039 | 1160 | 0   | miR-212   | 3617 | 2704 | 0 |
| miR-314   | 1271 | 1144 | -50 | miR-314   | 1785 | 1179 | 0   | miR-212   | 3556 | 2680 | 0 |
| miR-314   | 1355 | 1156 | 0   | miR-314   | 1833 | 1171 | 0   | miR-212   | 3654 | 2780 | 0 |
| miR-315   | 1463 | 1118 | 0   | miR-315   | 1581 | 1168 | 0   | miR-181a* | 6347 | 2722 | 0 |



|         |       |      |     |         |       |      |     |              |      |      |   |
|---------|-------|------|-----|---------|-------|------|-----|--------------|------|------|---|
| miR-315 | 1593  | 1083 | 0   | miR-315 | 1656  | 1166 | 0   | miR-181a*    | 7071 | 2341 | 0 |
| miR-316 | 1228  | 1063 | -50 | miR-316 | 2114  | 1169 | 0   | miR-181a*    | 6569 | 2758 | 0 |
| miR-316 | 10339 | 1070 | 0   | miR-316 | 1763  | 1176 | 0   | miR-214      | 8231 | 2743 | 0 |
| miR-317 | 1583  | 1065 | 0   | miR-317 | 1753  | 1180 | 0   | miR-214      | 7541 | 2693 | 0 |
| miR-317 | 1494  | 1088 | 0   | miR-317 | 1711  | 1157 | 0   | miR-214      | 8468 | 2789 | 0 |
| miR-318 | 1699  | 1112 | 0   | miR-318 | 1740  | 1141 | 0   | miR-215      | 5179 | 2725 | 0 |
| miR-318 | 1711  | 1111 | 0   | miR-318 | 1741  | 1146 | 0   | miR-215      | 4972 | 2210 | 0 |
| miR-32  | 1160  | 1126 | -50 | miR-32  | 1093  | 1099 | -50 | miR-215      | 5181 | 2736 | 0 |
| miR-32  | 1167  | 1142 | -50 | miR-32  | 1142  | 1096 | -50 | miR-216      | 3811 | 2171 | 0 |
| miR-320 | 1286  | 1124 | 0   | miR-320 | 1910  | 1169 | 0   | miR-216      | 4154 | 2156 | 0 |
| miR-320 | 1353  | 1128 | 0   | miR-320 | 1898  | 1163 | 0   | miR-216      | 3849 | 2131 | 0 |
| miR-321 | 45647 | 1170 | 0   | miR-321 | 65535 | 1183 | 0   | miR-217      | 4002 | 2252 | 0 |
| miR-321 | 45190 | 1159 | 0   | miR-321 | 65535 | 1173 | 0   | miR-217      | 3761 | 2284 | 0 |
| miR-322 | 1531  | 1211 | 0   | miR-322 | 1669  | 1147 | 0   | miR-217      | 3824 | 2142 | 0 |
| miR-322 | 1573  | 1201 | 0   | miR-322 | 1797  | 1108 | 0   | miR-218      | 3945 | 2179 | 0 |
| miR-323 | 1829  | 1170 | 0   | miR-323 | 1999  | 1108 | 0   | miR-218      | 4144 | 2155 | 0 |
| miR-323 | 1781  | 1171 | 0   | miR-323 | 1998  | 1152 | 0   | miR-218      | 3953 | 2109 | 0 |
| miR-324 | 1301  | 1194 | -50 | miR-324 | 1259  | 1154 | -50 | miR-219      | 3924 | 2281 | 0 |
| miR-324 | 1311  | 1178 | -50 | miR-324 | 1294  | 1127 | -50 | miR-219      | 3747 | 2294 | 0 |
| miR-325 | 1153  | 1172 | -50 | miR-325 | 1173  | 1121 | -50 | miR-219      | 3790 | 2167 | 0 |
| miR-325 | 1158  | 1175 | -50 | miR-325 | 1164  | 1132 | -50 | miR-22b      | 2933 | 2190 | 0 |
| miR-326 | 2571  | 1100 | 0   | miR-326 | 2444  | 1139 | 0   | miR-22b      | 2694 | 2112 | 0 |
| miR-326 | 2787  | 1101 | 0   | miR-326 | 2560  | 1154 | 0   | miR-22b      | 2731 | 2100 | 0 |
| miR-327 | 1827  | 1118 | 0   | miR-327 | 2336  | 1145 | 0   | miR-220      | 2988 | 2159 | 0 |
| miR-327 | 1945  | 1145 | 0   | miR-327 | 2389  | 1140 | 0   | miR-220      | 2928 | 2157 | 0 |
| miR-328 | 2693  | 1134 | 0   | miR-328 | 2637  | 1157 | 0   | miR-220      | 2852 | 2103 | 0 |
| miR-328 | 2717  | 1072 | 0   | miR-328 | 2687  | 1145 | 0   | miR-221      | 5631 | 2285 | 0 |
| miR-329 | 1534  | 1109 | 0   | miR-329 | 2012  | 1163 | 0   | miR-221      | 5837 | 2279 | 0 |
| miR-329 | 1376  | 1053 | -50 | miR-329 | 1996  | 1170 | 0   | miR-221      | 5547 | 2161 | 0 |
| miR-33  | 1181  | 1178 | -50 | miR-33  | 1161  | 1112 | -50 | miR-222      | 3851 | 2150 | 0 |
| miR-33  | 1228  | 1175 | -50 | miR-33  | 1249  | 1149 | -50 | miR-222      | 4050 | 2158 | 0 |
| miR-330 | 1327  | 1068 | -50 | miR-330 | 1785  | 1164 | 0   | miR-222      | 3943 | 2091 | 0 |
| miR-330 | 1334  | 1072 | -50 | miR-330 | 1665  | 1157 | 0   | miR-223      | 4450 | 2275 | 0 |
| miR-331 | 2181  | 1112 | 0   | miR-331 | 2889  | 1165 | 0   | miR-223      | 3889 | 2312 | 0 |
| miR-331 | 2188  | 1101 | 0   | miR-331 | 2881  | 1140 | 0   | miR-223      | 4434 | 2170 | 0 |
| miR-333 | 3530  | 1133 | 0   | miR-333 | 1682  | 1144 | 0   | miR-224      | 5855 | 2735 | 0 |
| miR-333 | 3062  | 1141 | 0   | miR-333 | 1701  | 1161 | 0   | miR-224      | 5438 | 2695 | 0 |
| miR-335 | 1297  | 1162 | -50 | miR-335 | 1765  | 1150 | 0   | miR-224      | 6049 | 2794 | 0 |
| miR-335 | 1284  | 1140 | -50 | miR-335 | 1775  | 1177 | 0   | miR-26ashort | 8533 | 2600 | 0 |
| miR-336 | 1531  | 1142 | -50 | miR-336 | 1999  | 1134 | 0   | miR-26ashort | 8506 | 2647 | 0 |
| miR-336 | 1672  | 1152 | 0   | miR-336 | 1931  | 1117 | 0   | miR-26ashort | 8569 | 2594 | 0 |
| miR-337 | 1854  | 1143 | 0   | miR-337 | 1776  | 1142 | 0   | miR-23a      | 2695 | 2052 | 0 |
| miR-337 | 1330  | 1175 | 0   | miR-337 | 1747  | 1186 | 0   | miR-23a      | 2801 | 2058 | 0 |
| miR-338 | 1332  | 1167 | 0   | miR-338 | 1801  | 1208 | 0   | miR-23a      | 2708 | 1989 | 0 |
| miR-338 | 1743  | 1206 | 0   | miR-338 | 1756  | 1152 | 0   | miR-23b      | 2746 | 2174 | 0 |
| miR-339 | 2170  | 1187 | 0   | miR-339 | 2103  | 1110 | 0   | miR-23b      | 2723 | 2118 | 0 |
| miR-339 | 1883  | 1156 | 0   | miR-339 | 2167  | 1122 | 0   | miR-23b      | 2850 | 2104 | 0 |
| miR-34  | 1008  | 1067 | -50 | miR-34  | 1372  | 1142 | 0   | miR-24       | 2729 | 2057 | 0 |

|         |      |      |     |         |      |      |     |             |      |      |   |
|---------|------|------|-----|---------|------|------|-----|-------------|------|------|---|
| miR-34  | 1052 | 1078 | -50 | miR-34  | 1148 | 1123 | -50 | miR-24      | 2711 | 2043 | 0 |
| miR-340 | 1113 | 1132 | -50 | miR-340 | 1165 | 1120 | -50 | miR-24      | 2676 | 1978 | 0 |
| miR-340 | 1188 | 1115 | -50 | miR-340 | 1173 | 1137 | -50 | miR-25      | 4487 | 2145 | 0 |
| miR-341 | 2277 | 1112 | 0   | miR-341 | 1974 | 1157 | 0   | miR-25      | 4485 | 2130 | 0 |
| miR-341 | 2253 | 1099 | 0   | miR-341 | 1992 | 1150 | 0   | miR-25      | 4519 | 2095 | 0 |
| miR-342 | 1511 | 1161 | 0   | miR-342 | 1794 | 1174 | 0   | miR-263b    | 5942 | 2737 | 0 |
| miR-342 | 1338 | 1098 | 0   | miR-342 | 1962 | 1202 | 0   | miR-263b    | 7281 | 2475 | 0 |
| miR-343 | 2653 | 1102 | 0   | miR-343 | 2715 | 1152 | 0   | miR-263b    | 6285 | 2727 | 0 |
| miR-343 | 2690 | 1085 | 0   | miR-343 | 2471 | 1159 | 0   | miR-26along | 6150 | 2676 | 0 |
| miR-344 | 1623 | 1105 | 0   | miR-344 | 1757 | 1160 | 0   | miR-26along | 6065 | 2719 | 0 |
| miR-344 | 1582 | 1095 | 0   | miR-344 | 1783 | 1145 | 0   | miR-26along | 5882 | 2649 | 0 |
| miR-345 | 2186 | 1103 | 0   | miR-345 | 2303 | 1169 | 0   | miR-26mm2   | 4545 | 2740 | 0 |
| miR-345 | 1726 | 1107 | 0   | miR-345 | 2180 | 1164 | 0   | miR-26mm2   | 4705 | 2825 | 0 |
| miR-346 | 2328 | 1126 | 0   | miR-346 | 2053 | 1140 | 0   | miR-26mm2   | 4423 | 2754 | 0 |
| miR-346 | 2533 | 1132 | 0   | miR-346 | 2031 | 1150 | 0   | miR-26mm6   | 4258 | 2907 | 0 |
| miR-347 | 2303 | 1141 | 0   | miR-347 | 3548 | 1145 | 0   | miR-26mm6   | 4349 | 2907 | 0 |
| miR-347 | 2613 | 1140 | 0   | miR-347 | 3385 | 1160 | 0   | miR-26mm6   | 4332 | 2909 | 0 |
| miR-349 | 1867 | 1113 | 0   | miR-349 | 2026 | 1149 | 0   | miR-275     | 8903 | 2712 | 0 |
| miR-349 | 1895 | 1123 | 0   | miR-349 | 2116 | 1161 | 0   | miR-275     | 8062 | 2711 | 0 |
| miR-34a | 1799 | 1065 | 0   | miR-34a | 2610 | 1683 | 0   | miR-275     | 9645 | 2816 | 0 |
| miR-34a | 1805 | 1066 | 0   | miR-34a | 2825 | 1694 | 0   | miR-276b    | 5054 | 2719 | 0 |
| miR-34b | 1437 | 1083 | -50 | miR-34b | 2453 | 1611 | 0   | miR-276b    | 5970 | 2651 | 0 |
| miR-34b | 1536 | 1082 | 0   | miR-34b | 2522 | 1638 | 0   | miR-276b    | 5177 | 2732 | 0 |
| miR-34c | 1684 | 1118 | 0   | miR-34c | 2706 | 1584 | 0   | miR-277     | 5466 | 2729 | 0 |
| miR-34c | 1674 | 1104 | 0   | miR-34c | 2658 | 1589 | 0   | miR-277     | 5039 | 2715 | 0 |
| miR-35  | 1097 | 1071 | -50 | miR-35  | 1141 | 1128 | -50 | miR-277     | 5651 | 2774 | 0 |
| miR-35  | 1099 | 1054 | -50 | miR-35  | 1222 | 1085 | -50 | miR-278     | 5303 | 2708 | 0 |
| miR-350 | 1404 | 1151 | 0   | miR-350 | 1912 | 1169 | 0   | miR-278     | 5901 | 2644 | 0 |
| miR-350 | 1644 | 1176 | 0   | miR-350 | 2094 | 1190 | 0   | miR-278     | 5131 | 2764 | 0 |
| miR-351 | 1803 | 1150 | 0   | miR-351 | 2186 | 1174 | 0   | miR-279     | 5688 | 2729 | 0 |
| miR-351 | 1926 | 1157 | 0   | miR-351 | 1774 | 1149 | 0   | miR-279     | 5522 | 2728 | 0 |
| miR-352 | 1713 | 1192 | 0   | miR-352 | 1789 | 1148 | 0   | miR-279     | 5939 | 2792 | 0 |
| miR-352 | 1701 | 1192 | 0   | miR-352 | 1679 | 1152 | 0   | miR-27a     | 2736 | 2041 | 0 |
| miR-36  | 1083 | 1043 | -50 | miR-36  | 1158 | 1115 | -50 | miR-27a     | 2804 | 2027 | 0 |
| miR-36  | 1037 | 1074 | -50 | miR-36  | 1079 | 1110 | -50 | miR-27a     | 2667 | 1980 | 0 |
| miR-361 | 1358 | 1057 | -50 | miR-361 | 2598 | 1467 | 0   | miR-27b     | 4386 | 2137 | 0 |
| miR-361 | 1293 | 1057 | -50 | miR-361 | 2505 | 1528 | 0   | miR-27b     | 4416 | 2109 | 0 |
| miR-365 | 1513 | 1135 | 0   | miR-365 | 2946 | 1583 | 0   | miR-27b     | 4345 | 2107 | 0 |
| miR-365 | 1472 | 1091 | 0   | miR-365 | 3028 | 1616 | 0   | miR-28      | 2655 | 2036 | 0 |
| miR-367 | 1290 | 1122 | -50 | miR-367 | 2603 | 1617 | 0   | miR-28      | 2757 | 2006 | 0 |
| miR-367 | 1342 | 1127 | -50 | miR-367 | 2827 | 1622 | 0   | miR-28      | 2661 | 1970 | 0 |
| miR-368 | 1233 | 1113 | -50 | miR-368 | 2821 | 1630 | 0   | miR-281     | 5160 | 2716 | 0 |
| miR-368 | 1268 | 1105 | -50 | miR-368 | 2791 | 1613 | 0   | miR-281     | 5676 | 2654 | 0 |
| miR-369 | 1519 | 1178 | 0   | miR-369 | 2743 | 1750 | 0   | miR-281     | 5182 | 2757 | 0 |
| miR-369 | 1517 | 1165 | 0   | miR-369 | 2806 | 1738 | 0   | miR-283     | 3741 | 2181 | 0 |

|            |      |      |     |            |      |      |     |             |       |      |   |
|------------|------|------|-----|------------|------|------|-----|-------------|-------|------|---|
| miR-37     | 1481 | 1054 | 0   | miR-37     | 1714 | 1113 | 0   | miR-283     | 3881  | 2161 | 0 |
| miR-37     | 1480 | 1070 | 0   | miR-37     | 1708 | 1124 | 0   | miR-283     | 3699  | 2112 | 0 |
| miR-370    | 2397 | 1101 | 0   | miR-370    | 3722 | 1698 | 0   | miR-285     | 4057  | 2282 | 0 |
| miR-370    | 2420 | 1108 | 0   | miR-370    | 3617 | 1702 | 0   | miR-285     | 4180  | 2282 | 0 |
| miR-371    | 2280 | 1051 | 0   | miR-371    | 2496 | 1408 | 0   | miR-285     | 4306  | 2186 | 0 |
| miR-371    | 1910 | 1046 | 0   | miR-371    | 2652 | 1435 | 0   | miR-286     | 3896  | 2208 | 0 |
| miR-372    | 1350 | 1034 | 0   | miR-372    | 2531 | 1483 | 0   | miR-286     | 3777  | 2158 | 0 |
| miR-372    | 1246 | 1066 | -50 | miR-372    | 2465 | 1492 | 0   | miR-286     | 3801  | 2123 | 0 |
| miR-373    | 1347 | 1079 | 0   | miR-373    | 2569 | 1463 | 0   | miR-290     | 4371  | 2276 | 0 |
| miR-373    | 1379 | 1059 | 0   | miR-373    | 2519 | 1478 | 0   | miR-290     | 4373  | 2293 | 0 |
| miR-373*   | 1599 | 1099 | 0   | miR-373*   | 4760 | 1496 | 0   | miR-290     | 4146  | 2190 | 0 |
| miR-373*   | 1558 | 1061 | 0   | miR-373*   | 4567 | 1508 | 0   | miR-291a-3p | 4404  | 2283 | 0 |
| miR-374    | 1318 | 1070 | 0   | miR-374    | 2710 | 1492 | 0   | miR-291a-3p | 4580  | 2273 | 0 |
| miR-374    | 1264 | 1057 | -50 | miR-374    | 2564 | 1510 | 0   | miR-291a-3p | 4620  | 2192 | 0 |
| miR-375    | 2117 | 1091 | 0   | miR-375    | 2868 | 1598 | 0   | miR-291-5p  | 5185  | 2207 | 0 |
| miR-375    | 2018 | 1111 | 0   | miR-375    | 2803 | 1609 | 0   | miR-291-5p  | 5464  | 2145 | 0 |
| miR-376a   | 1432 | 1147 | 0   | miR-376a   | 2817 | 1670 | 0   | miR-291-5p  | 5299  | 2108 | 0 |
| miR-376a   | 1420 | 1154 | -50 | miR-376a   | 2642 | 1702 | 0   | miR-292-3p  | 4221  | 2252 | 0 |
| miR-376b   | 1397 | 1137 | 0   | miR-376b   | 3216 | 1702 | 0   | miR-292-3p  | 4144  | 2248 | 0 |
| miR-376b   | 1392 | 1128 | -50 | miR-376b   | 3114 | 1701 | 0   | miR-292-3p  | 4170  | 2221 | 0 |
| miR-377    | 1425 | 1066 | 0   | miR-377    | 2605 | 1460 | 0   | miR-292-5p  | 3833  | 2168 | 0 |
| miR-377    | 1239 | 1056 | -50 | miR-377    | 2621 | 1428 | 0   | miR-292-5p  | 4031  | 2156 | 0 |
| miR-378    | 1817 | 1112 | 0   | miR-378    | 3282 | 1486 | 0   | miR-292-5p  | 3943  | 2115 | 0 |
| miR-378    | 1651 | 1078 | 0   | miR-378    | 3185 | 1468 | 0   | miR-293     | 5608  | 2754 | 0 |
| miR-379    | 1400 | 1084 | 0   | miR-379    | 2428 | 1424 | 0   | miR-293     | 5251  | 2818 | 0 |
| miR-379    | 1452 | 1086 | 0   | miR-379    | 2472 | 1448 | 0   | miR-293     | 5763  | 2824 | 0 |
| miR-38     | 1189 | 1100 | -50 | miR-38     | 1129 | 1125 | -50 | miR-294     | 5741  | 2714 | 0 |
| miR-38     | 1143 | 1101 | -50 | miR-38     | 1169 | 1113 | -50 | miR-294     | 6566  | 2614 | 0 |
| miR-380-3p | 5356 | 1113 | 0   | miR-380-3p | 8440 | 1450 | 0   | miR-294     | 5925  | 2710 | 0 |
| miR-380-3p | 5448 | 1091 | 0   | miR-380-3p | 8327 | 1471 | 0   | miR-295     | 5740  | 2774 | 0 |
| miR-380-5p | 1570 | 1082 | 0   | miR-380-5p | 2512 | 1546 | 0   | miR-295     | 5523  | 2785 | 0 |
| miR-380-5p | 1548 | 1093 | 0   | miR-380-5p | 2455 | 1522 | 0   | miR-295     | 5778  | 2797 | 0 |
| miR-381    | 1467 | 1122 | 0   | miR-381    | 2569 | 1512 | 0   | miR-296     | 8742  | 2678 | 0 |
| miR-381    | 1505 | 1085 | 0   | miR-381    | 2574 | 1511 | 0   | miR-296     | 10319 | 2652 | 0 |
| miR-382    | 1866 | 1102 | 0   | miR-382    | 2520 | 1511 | 0   | miR-296     | 9074  | 2689 | 0 |
| miR-382    | 1966 | 1106 | 0   | miR-382    | 2544 | 1520 | 0   | miR-297     | 7224  | 2792 | 0 |
| miR-383    | 3500 | 1073 | 0   | miR-383    | 5740 | 1674 | 0   | miR-297     | 6744  | 2758 | 0 |
| miR-383    | 4472 | 1111 | 0   | miR-383    | 5686 | 1653 | 0   | miR-297     | 6942  | 2763 | 0 |
| miR-384    | 1402 | 1041 | 0   | miR-384    | 2740 | 1468 | 0   | miR-298     | 5649  | 2687 | 0 |
| miR-384    | 1480 | 1074 | 0   | miR-384    | 2688 | 1446 | 0   | miR-298     | 6726  | 2734 | 0 |
| miR-39     | 1071 | 1043 | -50 | miR-39     | 1217 | 1114 | -50 | miR-298     | 6438  | 2728 | 0 |

|          |      |      |     |          |      |      |     |           |      |      |   |
|----------|------|------|-----|----------|------|------|-----|-----------|------|------|---|
| miR-39   | 1091 | 1044 | -50 | miR-39   | 1152 | 1110 | -50 | miR-299   | 6581 | 2750 | 0 |
| miR-4    | 1323 | 1085 | -50 | miR-4    | 1766 | 1126 | 0   | miR-299   | 6760 | 2789 | 0 |
| miR-4    | 1335 | 1073 | -50 | miR-4    | 1685 | 1133 | 0   | miR-299   | 6851 | 2758 | 0 |
| miR-40   | 1045 | 1029 | -50 | miR-40   | 1153 | 1110 | -50 | miR-29a   | 4757 | 2509 | 0 |
| miR-40   | 1075 | 1046 | -50 | miR-40   | 1147 | 1119 | -50 | miR-29a   | 5278 | 2775 | 0 |
| miR-409  | 2622 | 1047 | 0   | miR-409  | 4143 | 1464 | 0   | miR-29a   | 4331 | 2570 | 0 |
| miR-409  | 2710 | 1106 | 0   | miR-409  | 3973 | 1467 | 0   | miR-29b   | 3552 | 2639 | 0 |
| miR-41   | 1153 | 1098 | -50 | miR-41   | 1166 | 1119 | -50 | miR-29b   | 3523 | 2714 | 0 |
| miR-41   | 1139 | 1123 | -50 | miR-41   | 1194 | 1133 | -50 | miR-29b   | 3532 | 2650 | 0 |
| miR-410  | 2631 | 1046 | 0   | miR-410  | 3989 | 1447 | 0   | miR-29c   | 3087 | 2550 | 0 |
| miR-410  | 2598 | 1039 | 0   | miR-410  | 3866 | 1425 | 0   | miR-29c   | 3553 | 2762 | 0 |
| miR-411  | 1362 | 1060 | 0   | miR-411  | 2640 | 1468 | 0   | miR-29c   | 3301 | 2593 | 0 |
| miR-411  | 1404 | 1090 | 0   | miR-411  | 2596 | 1491 | 0   | miR-3     | 3512 | 2652 | 0 |
| miR-412  | 1451 | 1052 | 0   | miR-412  | 3202 | 1573 | 0   | miR-3     | 3634 | 2733 | 0 |
| miR-412  | 1610 | 1049 | 0   | miR-412  | 3186 | 1561 | 0   | miR-3     | 3644 | 2669 | 0 |
| miR-42   | 1322 | 1122 | -50 | miR-42   | 1797 | 1157 | 0   | miR-300   | 5780 | 2703 | 0 |
| miR-42   | 1400 | 1129 | 0   | miR-42   | 1882 | 1133 | 0   | miR-300   | 5929 | 2732 | 0 |
| miR-425  | 1681 | 1090 | 0   | miR-425  | 3024 | 1541 | 0   | miR-300   | 6068 | 2759 | 0 |
| miR-425  | 1628 | 1129 | 0   | miR-425  | 2905 | 1537 | 0   | miR-301   | 3853 | 2177 | 0 |
| miR-429  | 1448 | 1106 | 0   | miR-429  | 2625 | 1548 | 0   | miR-301   | 3772 | 2167 | 0 |
| miR-429  | 1354 | 1141 | 0   | miR-429  | 2740 | 1542 | 0   | miR-301   | 3854 | 2109 | 0 |
| miR-43   | 1161 | 1128 | -50 | miR-43   | 1105 | 1106 | -50 | miR-302   | 3893 | 2271 | 0 |
| miR-43   | 1177 | 1125 | -50 | miR-43   | 1111 | 1107 | -50 | miR-302   | 4074 | 2265 | 0 |
| miR-430a | 1612 | 1069 | 0   | miR-430a | 2212 | 1485 | 0   | miR-302   | 3877 | 2216 | 0 |
| miR-430a | 1617 | 1090 | 0   | miR-430a | 2296 | 1530 | 0   | miR-303   | 3844 | 2179 | 0 |
| miR-430b | 1678 | 1114 | 0   | miR-430b | 2580 | 1593 | 0   | miR-303   | 3843 | 2163 | 0 |
| miR-430b | 1593 | 1117 | 0   | miR-430b | 2890 | 1567 | 0   | miR-303   | 3858 | 2100 | 0 |
| miR-430c | 1499 | 1086 | 0   | miR-430c | 2875 | 1575 | 0   | miR-304   | 3804 | 2257 | 0 |
| miR-430c | 1537 | 1093 | 0   | miR-430c | 2982 | 1659 | 0   | miR-304   | 3855 | 2251 | 0 |
| miR-44   | 1104 | 1116 | -50 | miR-44   | 1133 | 1090 | -50 | miR-304   | 3813 | 2211 | 0 |
| miR-44   | 1155 | 1141 | -50 | miR-44   | 1130 | 1104 | -50 | miR-305   | 4029 | 2165 | 0 |
| miR-448  | 1527 | 1110 | 0   | miR-448  | 2551 | 1588 | 0   | miR-305   | 3976 | 2171 | 0 |
| miR-448  | 1526 | 1110 | 0   | miR-448  | 2447 | 1575 | 0   | miR-305   | 3639 | 2103 | 0 |
| miR-449  | 2016 | 1111 | 0   | miR-449  | 2458 | 1585 | 0   | miR-306   | 4009 | 2298 | 0 |
| miR-449  | 1946 | 1131 | 0   | miR-449  | 2393 | 1564 | 0   | miR-306   | 3991 | 2235 | 0 |
| miR-450  | 1751 | 1143 | 0   | miR-450  | 2624 | 1622 | 0   | miR-306   | 3976 | 2249 | 0 |
| miR-450  | 1736 | 1136 | 0   | miR-450  | 2753 | 1665 | 0   | miR-307   | 4153 | 2176 | 0 |
| miR-46   | 1154 | 1144 | -50 | miR-46   | 1111 | 1108 | -50 | miR-307   | 4017 | 2158 | 0 |
| miR-46   | 2359 | 1186 | 0   | miR-46   | 1154 | 1135 | -50 | miR-307   | 4257 | 2126 | 0 |
| miR-47   | 1055 | 1057 | -50 | miR-47   | 1117 | 1137 | -50 | miR-308   | 4090 | 2309 | 0 |
| miR-47   | 1033 | 1082 | -50 | miR-47   | 1167 | 1114 | -50 | miR-308   | 4133 | 2258 | 0 |
| miR-48   | 1050 | 1053 | -50 | miR-48   | 1184 | 1113 | -50 | miR-308   | 4135 | 2258 | 0 |
| miR-48   | 1101 | 1046 | 0   | miR-48   | 1116 | 1115 | -50 | miR-309   | 5472 | 2738 | 0 |
| miR-49   | 1313 | 1088 | 0   | miR-49   | 1594 | 1113 | 0   | miR-309   | 5519 | 2760 | 0 |
| miR-49   | 1220 | 1070 | 0   | miR-49   | 1620 | 1096 | 0   | miR-309   | 5127 | 2758 | 0 |
| miR-5    | 1262 | 1063 | -50 | miR-5    | 1644 | 1128 | 0   | miR-30-as | 4811 | 2587 | 0 |
| miR-5    | 1299 | 1014 | 0   | miR-5    | 1648 | 1112 | 0   | miR-30-as | 5164 | 2731 | 0 |
| miR-50   | 1095 | 1093 | -50 | miR-50   | 1263 | 1118 | -50 | miR-30-as | 4928 | 2663 | 0 |
| miR-50   | 1170 | 1070 | -50 | miR-50   | 1249 | 1109 | -50 | miR-30a-s | 3562 | 2639 | 0 |

|         |      |      |     |         |      |      |     |           |       |      |     |
|---------|------|------|-----|---------|------|------|-----|-----------|-------|------|-----|
| miR-51  | 1316 | 1046 | 0   | miR-51  | 1184 | 1121 | -50 | miR-30a-s | 3510  | 2700 | 0   |
| miR-51  | 1077 | 1068 | -50 | miR-51  | 1216 | 1115 | -50 | miR-30a-s | 3593  | 2665 | 0   |
| miR-52  | 1713 | 1025 | 0   | miR-52  | 2043 | 1128 | 0   | miR-31    | 6014  | 2657 | 0   |
| miR-52  | 1662 | 1035 | 0   | miR-52  | 2084 | 1153 | 0   | miR-31    | 5990  | 2671 | 0   |
| miR-53  | 1704 | 1031 | 0   | miR-53  | 1951 | 1112 | 0   | miR-31    | 6097  | 2696 | 0   |
| miR-53  | 1746 | 1036 | 0   | miR-53  | 1903 | 1133 | 0   | miR-310   | 5395  | 2693 | 0   |
| miR-54  | 1049 | 1059 | -50 | miR-54  | 1154 | 1135 | -50 | miR-310   | 5342  | 2758 | 0   |
| miR-54  | 1181 | 1096 | -50 | miR-54  | 1181 | 1146 | -50 | miR-310   | 5297  | 2750 | 0   |
| miR-55  | 1109 | 1105 | -50 | miR-55  | 1172 | 1122 | -50 | miR-311   | 7746  | 2720 | 0   |
| miR-55  | 1160 | 1127 | -50 | miR-55  | 1134 | 1125 | -50 | miR-311   | 2840  | 2771 | -50 |
| miR-56* | 1189 | 1118 | -50 | miR-56* | 1266 | 1125 | -50 | miR-311   | 7776  | 2760 | 0   |
| miR-56* | 1151 | 1118 | -50 | miR-56* | 1224 | 1125 | -50 | miR-312   | 5753  | 2677 | 0   |
| miR-56  | 1154 | 1125 | -50 | miR-56  | 1167 | 1119 | -50 | miR-312   | 5427  | 2718 | 0   |
| miR-56  | 1116 | 1126 | -50 | miR-56  | 1146 | 1131 | -50 | miR-312   | 6010  | 2731 | 0   |
| miR-57  | 1264 | 1103 | -50 | miR-57  | 1188 | 1112 | -50 | miR-313   | 5518  | 2748 | 0   |
| miR-57  | 1267 | 1119 | 0   | miR-57  | 1210 | 1104 | -50 | miR-313   | 5990  | 2813 | 0   |
| miR-58  | 1064 | 1068 | -50 | miR-58  | 1194 | 1156 | -50 | miR-313   | 5934  | 2780 | 0   |
| miR-58  | 1137 | 1054 | -50 | miR-58  | 1228 | 1139 | -50 | miR-314   | 5566  | 2614 | 0   |
| miR-59  | 1109 | 1050 | -50 | miR-59  | 1212 | 1134 | -50 | miR-314   | 5538  | 2687 | 0   |
| miR-59  | 1016 | 1048 | -50 | miR-59  | 1139 | 1115 | -50 | miR-314   | 5975  | 2678 | 0   |
| miR-6   | 1135 | 1046 | -50 | miR-6   | 1177 | 1126 | -50 | miR-315   | 5343  | 2744 | 0   |
| miR-6   | 1076 | 1077 | -50 | miR-6   | 1094 | 1127 | -50 | miR-315   | 5724  | 2805 | 0   |
| miR-60  | 1041 | 1055 | -50 | miR-60  | 1142 | 1138 | -50 | miR-315   | 5453  | 2779 | 0   |
| miR-60  | 1063 | 1053 | -50 | miR-60  | 1044 | 1138 | -50 | miR-316   | 4061  | 2619 | 0   |
| miR-61  | 1086 | 1084 | -50 | miR-61  | 1131 | 1109 | -50 | miR-316   | 4019  | 2716 | 0   |
| miR-61  | 1116 | 1086 | -50 | miR-61  | 1145 | 1108 | -50 | miR-316   | 4791  | 2632 | 0   |
| miR-62  | 1110 | 1065 | -50 | miR-62  | 1112 | 1147 | -50 | miR-317   | 3863  | 2176 | 0   |
| miR-62  | 1085 | 1060 | -50 | miR-62  | 1193 | 1161 | -50 | miR-317   | 3716  | 2125 | 0   |
| miR-63  | 1310 | 999  | 0   | miR-63  | 1602 | 1168 | 0   | miR-317   | 3926  | 2122 | 0   |
| miR-63  | 1194 | 1028 | 0   | miR-63  | 1565 | 1233 | 0   | miR-318   | 4001  | 2314 | 0   |
| miR-64  | 1128 | 1021 | -50 | miR-64  | 1673 | 1261 | 0   | miR-318   | 4279  | 2260 | 0   |
| miR-64  | 1177 | 1022 | -50 | miR-64  | 1529 | 1191 | -50 | miR-318   | 4211  | 2290 | 0   |
| miR-65  | 1490 | 1048 | 0   | miR-65  | 1679 | 1149 | 0   | miR-32    | 3243  | 2634 | 0   |
| miR-65  | 1480 | 1079 | 0   | miR-65  | 1623 | 1169 | 0   | miR-32    | 3305  | 2703 | 0   |
| miR-66  | 7243 | 1086 | -50 | miR-66  | 7983 | 1139 | 0   | miR-32    | 3459  | 2728 | 0   |
| miR-66  | 7232 | 1087 | 0   | miR-66  | 7790 | 1125 | 0   | miR-320   | 4692  | 2158 | 0   |
| miR-67  | 1325 | 1121 | 0   | miR-67  | 1549 | 1117 | 0   | miR-320   | 4707  | 2137 | 0   |
| miR-67  | 1250 | 1116 | -50 | miR-67  | 1544 | 1140 | 0   | miR-320   | 4781  | 2125 | 0   |
| miR-68  | 1273 | 1116 | -50 | miR-68  | 1538 | 1126 | -50 | miR-321   | 65535 | 2329 | 0   |
| miR-68  | 1231 | 1109 | -50 | miR-68  | 1519 | 1164 | 0   | miR-321   | 65535 | 2263 | 0   |
| miR-69  | 8320 | 1108 | 0   | miR-69  | 8542 | 1143 | 0   | miR-321   | 65535 | 2278 | 0   |
| miR-69  | 8400 | 1094 | 0   | miR-69  | 8484 | 1118 | 0   | miR-322   | 3770  | 2161 | 0   |
| miR-7a  | 1059 | 1106 | -50 | miR-7a  | 1134 | 1082 | -50 | miR-322   | 3676  | 2155 | 0   |
| miR-7a  | 1153 | 1121 | -50 | miR-7a  | 1193 | 1078 | -50 | miR-322   | 3935  | 2131 | 0   |
| miR-70  | 1047 | 1067 | -50 | miR-70  | 1138 | 1141 | -50 | miR-323   | 5252  | 2304 | 0   |
| miR-70  | 1118 | 1057 | -50 | miR-70  | 1169 | 1151 | -50 | miR-323   | 5378  | 2238 | 0   |
| miR-71  | 1356 | 1112 | 0   | miR-71  | 1750 | 1258 | 0   | miR-323   | 5346  | 2272 | 0   |
| miR-71  | 1233 | 1071 | 0   | miR-71  | 1626 | 1162 | -50 | miR-324   | 3147  | 2161 | 0   |
| miR-72  | 1410 | 1044 | 0   | miR-72  | 1824 | 1199 | 0   | miR-324   | 3103  | 2158 | 0   |

|           |      |      |     |           |      |      |     |         |      |      |   |
|-----------|------|------|-----|-----------|------|------|-----|---------|------|------|---|
| miR-72    | 1460 | 1066 | 0   | miR-72    | 1739 | 1148 | 0   | miR-324 | 3214 | 2120 | 0 |
| miR-73    | 1184 | 1074 | -50 | miR-73    | 1233 | 1101 | -50 | miR-325 | 2978 | 2275 | 0 |
| miR-73    | 1107 | 1071 | -50 | miR-73    | 1230 | 1108 | -50 | miR-325 | 2877 | 2208 | 0 |
| miR-74    | 1250 | 1069 | -50 | miR-74    | 1850 | 1135 | 0   | miR-325 | 2901 | 2259 | 0 |
| miR-74    | 1470 | 1125 | 0   | miR-74    | 1866 | 1165 | 0   | miR-326 | 8084 | 2695 | 0 |
| miR-75    | 1279 | 1029 | -50 | miR-75    | 1708 | 1152 | 0   | miR-326 | 8883 | 2773 | 0 |
| miR-75    | 1296 | 1001 | -50 | miR-75    | 1780 | 1125 | 0   | miR-326 | 8043 | 2734 | 0 |
| miR-76    | 1477 | 978  | 0   | miR-76    | 1920 | 1139 | 0   | miR-327 | 6241 | 2621 | 0 |
| miR-76    | 1500 | 1019 | 0   | miR-76    | 1754 | 1178 | 0   | miR-327 | 5686 | 2758 | 0 |
| miR-77    | 1082 | 1102 | 0   | miR-77    | 1249 | 1146 | -50 | miR-327 | 6381 | 2649 | 0 |
| miR-77    | 1219 | 1108 | -50 | miR-77    | 1227 | 1146 | -50 | miR-328 | 8540 | 2661 | 0 |
| miR-78    | 1149 | 1090 | -50 | miR-78    | 1172 | 1142 | -50 | miR-328 | 9725 | 2741 | 0 |
| miR-78    | 1113 | 1103 | -50 | miR-78    | 1234 | 1143 | -50 | miR-328 | 8340 | 2744 | 0 |
| miR-79    | 1347 | 1168 | 0   | miR-79    | 1561 | 1124 | 0   | miR-329 | 8846 | 2575 | 0 |
| miR-79    | 1274 | 1131 | -50 | miR-79    | 1739 | 1157 | 0   | miR-329 | 7871 | 2748 | 0 |
| miR-8     | 1009 | 1118 | -50 | miR-8     | 1246 | 1104 | -50 | miR-329 | 9145 | 2660 | 0 |
| miR-8     | 1099 | 1113 | -50 | miR-8     | 1207 | 1103 | -50 | miR-33  | 3594 | 2685 | 0 |
| miR-80    | 5332 | 1118 | 0   | miR-80    | 7702 | 1165 | 0   | miR-33  | 3522 | 2662 | 0 |
| miR-80    | 7281 | 1133 | 0   | miR-80    | 7560 | 1163 | 0   | miR-33  | 3574 | 2695 | 0 |
| miR-81    | 1225 | 1134 | -50 | miR-81    | 1213 | 1118 | -50 | miR-330 | 6888 | 2640 | 0 |
| miR-81    | 1269 | 1100 | 0   | miR-81    | 1173 | 1128 | -50 | miR-330 | 6972 | 2750 | 0 |
| miR-83    | 1891 | 2136 | -50 | miR-83    | 3140 | 1396 | 0   | miR-330 | 7324 | 2756 | 0 |
| miR-83    | 1357 | 1130 | -50 | miR-83    | 2931 | 1398 | 0   | miR-331 | 9214 | 2585 | 0 |
| miR-84    | 1244 | 1034 | 0   | miR-84    | 2387 | 1392 | 0   | miR-331 | 7507 | 2735 | 0 |
| miR-84    | 1337 | 1061 | 0   | miR-84    | 2286 | 1394 | 0   | miR-331 | 9901 | 2652 | 0 |
| miR-85    | 1315 | 1064 | -50 | miR-85    | 2290 | 1384 | 0   | miR-333 | 5515 | 2643 | 0 |
| miR-85    | 1336 | 1056 | -50 | miR-85    | 2321 | 1382 | 0   | miR-333 | 6626 | 2766 | 0 |
| miR-86    | 1414 | 1101 | 0   | miR-86    | 2340 | 1355 | 0   | miR-333 | 5730 | 2742 | 0 |
| miR-86    | 1362 | 1060 | 0   | miR-86    | 2375 | 1366 | 0   | miR-335 | 4872 | 2576 | 0 |
| miR-87    | 2192 | 1013 | 0   | miR-87    | 2225 | 1398 | 0   | miR-335 | 4875 | 2753 | 0 |
| miR-87    | 2172 | 997  | 0   | miR-87    | 2381 | 1422 | 0   | miR-335 | 3868 | 2247 | 0 |
| miR-88    | 1763 | 1008 | 0   | miR-88    | 3790 | 1398 | 0   | miR-336 | 4952 | 2153 | 0 |
| miR-88    | 1791 | 1057 | 0   | miR-88    | 3590 | 1393 | 0   | miR-336 | 4645 | 2153 | 0 |
| miR-89    | 1267 | 1083 | -50 | miR-89    | 2435 | 1416 | 0   | miR-336 | 4988 | 2131 | 0 |
| miR-89    | 1233 | 1114 | -50 | miR-89    | 2391 | 1404 | 0   | miR-337 | 4083 | 2274 | 0 |
| miR-9     | 1084 | 1089 | -50 | miR-9     | 1173 | 1122 | -50 | miR-337 | 4337 | 2187 | 0 |
| miR-9     | 1073 | 1079 | -50 | miR-9     | 1212 | 1109 | -50 | miR-337 | 4030 | 2230 | 0 |
| miR-90    | 2103 | 1113 | 0   | miR-90    | 5701 | 1408 | 0   | miR-338 | 3960 | 2126 | 0 |
| miR-90    | 1926 | 1056 | 0   | miR-90    | 5696 | 1383 | 0   | miR-338 | 3787 | 2157 | 0 |
| miR-17-5p | 1107 | 1081 | -50 | miR-17-5p | 1429 | 1388 | -50 | miR-338 | 4023 | 2097 | 0 |
| miR-17-5p | 1087 | 1073 | -50 | miR-17-5p | 1511 | 1383 | -50 | miR-339 | 5300 | 2240 | 0 |
| miR-92    | 2168 | 1022 | 0   | miR-92    | 3944 | 1380 | 0   | miR-339 | 5605 | 2161 | 0 |
| miR-92    | 2137 | 1006 | 0   | miR-92    | 4384 | 1409 | 0   | miR-339 | 5391 | 2247 | 0 |
| miR-93    | 1652 | 1025 | 0   | miR-93    | 2658 | 1449 | 0   | miR-34  | 2712 | 2178 | 0 |
| miR-93    | 1739 | 1054 | 0   | miR-93    | 2166 | 1405 | 0   | miR-34  | 2753 | 2124 | 0 |
| miR-94    | 1577 | 1055 | 0   | miR-94    | 2408 | 1386 | 0   | miR-34  | 2712 | 2078 | 0 |
| miR-94    | 1592 | 1034 | 0   | miR-94    | 2251 | 1403 | 0   | miR-340 | 2867 | 2172 | 0 |
| miR-95    | 2919 | 1969 | -50 | miR-95    | 2601 | 1436 | 0   | miR-340 | 2665 | 2149 | 0 |
| miR-95    | 1275 | 1188 | -50 | miR-95    | 2474 | 1413 | 0   | miR-340 | 2757 | 2068 | 0 |

|               |      |      |     |               |      |      |   |         |      |      |   |
|---------------|------|------|-----|---------------|------|------|---|---------|------|------|---|
| miR-96        | 1548 | 1066 | 0   | miR-96        | 2724 | 1392 | 0 | miR-341 | 4593 | 2226 | 0 |
| miR-96        | 1608 | 1050 | 0   | miR-96        | 2619 | 1405 | 0 | miR-341 | 4785 | 2136 | 0 |
| miR-30a-5p    | 1343 | 1077 | -50 | miR-30a-5p    | 2637 | 1416 | 0 | miR-341 | 4672 | 2206 | 0 |
| miR-30a-5p    | 1339 | 1064 | -50 | miR-30a-5p    | 2549 | 1405 | 0 | miR-342 | 4096 | 2204 | 0 |
| miR-98        | 1654 | 1067 | 0   | miR-98        | 3655 | 1404 | 0 | miR-342 | 3812 | 2134 | 0 |
| miR-98        | 1578 | 1057 | 0   | miR-98        | 3071 | 1413 | 0 | miR-342 | 3966 | 2098 | 0 |
| miR-99a       | 1775 | 1042 | 0   | miR-99a       | 3632 | 1431 | 0 | miR-343 | 5365 | 2231 | 0 |
| miR-99a       | 1736 | 1023 | 0   | miR-99a       | 3476 | 1445 | 0 | miR-343 | 5446 | 2072 | 0 |
| miR-99b       | 1599 | 1040 | 0   | miR-99b       | 3255 | 1392 | 0 | miR-343 | 5556 | 2213 | 0 |
| miR-99b       | 1637 | 1061 | 0   | miR-99b       | 3117 | 1405 | 0 | miR-344 | 5751 | 2672 | 0 |
| PsA-NAD-dehyd | 1400 | 1089 | 0   | PsA-NAD-dehyd | 2811 | 1588 | 0 | miR-344 | 6671 | 2763 | 0 |
| PsA-NAD-dehyd | 1321 | 1095 | -50 | PsA-NAD-dehyd | 2701 | 1577 | 0 | miR-344 | 6038 | 2734 | 0 |
|               |      |      |     |               |      |      |   | miR-345 | 6503 | 2525 | 0 |
|               |      |      |     |               |      |      |   | miR-345 | 5535 | 2740 | 0 |
|               |      |      |     |               |      |      |   | miR-345 | 6756 | 1986 | 0 |
|               |      |      |     |               |      |      |   | miR-346 | 7556 | 2667 | 0 |
|               |      |      |     |               |      |      |   | miR-346 | 8646 | 2760 | 0 |
|               |      |      |     |               |      |      |   | miR-346 | 7420 | 2699 | 0 |
|               |      |      |     |               |      |      |   | miR-347 | 8802 | 2541 | 0 |
|               |      |      |     |               |      |      |   | miR-347 | 8419 | 2758 | 0 |
|               |      |      |     |               |      |      |   | miR-347 | 8838 | 2223 | 0 |
|               |      |      |     |               |      |      |   | miR-349 | 5753 | 2653 | 0 |
|               |      |      |     |               |      |      |   | miR-349 | 8894 | 2735 | 0 |
|               |      |      |     |               |      |      |   | miR-349 | 8056 | 2683 | 0 |
|               |      |      |     |               |      |      |   | miR-34a | 5235 | 2744 | 0 |
|               |      |      |     |               |      |      |   | miR-34a | 4959 | 2756 | 0 |
|               |      |      |     |               |      |      |   | miR-34a | 5357 | 2768 | 0 |
|               |      |      |     |               |      |      |   | miR-34b | 4494 | 2607 | 0 |
|               |      |      |     |               |      |      |   | miR-34b | 4413 | 2708 | 0 |
|               |      |      |     |               |      |      |   | miR-34b | 4491 | 2590 | 0 |
|               |      |      |     |               |      |      |   | miR-34c | 5428 | 2788 | 0 |
|               |      |      |     |               |      |      |   | miR-34c | 5390 | 2719 | 0 |
|               |      |      |     |               |      |      |   | miR-34c | 5367 | 2784 | 0 |
|               |      |      |     |               |      |      |   | miR-35  | 2670 | 2053 | 0 |
|               |      |      |     |               |      |      |   | miR-35  | 2696 | 2036 | 0 |
|               |      |      |     |               |      |      |   | miR-35  | 2606 | 1961 | 0 |
|               |      |      |     |               |      |      |   | miR-350 | 5956 | 2561 | 0 |
|               |      |      |     |               |      |      |   | miR-350 | 5545 | 2779 | 0 |
|               |      |      |     |               |      |      |   | miR-350 | 6101 | 2534 | 0 |
|               |      |      |     |               |      |      |   | miR-351 | 5942 | 2621 | 0 |
|               |      |      |     |               |      |      |   | miR-351 | 6148 | 2720 | 0 |
|               |      |      |     |               |      |      |   | miR-351 | 6027 | 2696 | 0 |
|               |      |      |     |               |      |      |   | miR-352 | 6046 | 2551 | 0 |
|               |      |      |     |               |      |      |   | miR-352 | 5724 | 2763 | 0 |
|               |      |      |     |               |      |      |   | miR-352 | 5706 | 2578 | 0 |
|               |      |      |     |               |      |      |   | miR-36  | 2722 | 2172 | 0 |
|               |      |      |     |               |      |      |   | miR-36  | 2686 | 2119 | 0 |

|          |       |      |   |
|----------|-------|------|---|
| miR-36   | 2704  | 2094 | 0 |
| miR-361  | 4935  | 2648 | 0 |
| miR-361  | 5099  | 2595 | 0 |
| miR-361  | 4834  | 2634 | 0 |
| miR-365  | 7089  | 2653 | 0 |
| miR-365  | 6415  | 2667 | 0 |
| miR-365  | 6808  | 2635 | 0 |
| miR-367  | 4547  | 2552 | 0 |
| miR-367  | 4729  | 2680 | 0 |
| miR-367  | 4501  | 2580 | 0 |
| miR-368  | 4681  | 2848 | 0 |
| miR-368  | 4677  | 2861 | 0 |
| miR-368  | 4672  | 2899 | 0 |
| miR-369  | 4396  | 2433 | 0 |
| miR-369  | 4768  | 2659 | 0 |
| miR-369  | 4367  | 2457 | 0 |
| miR-37   | 5257  | 2077 | 0 |
| miR-37   | 5212  | 2006 | 0 |
| miR-37   | 5259  | 1982 | 0 |
| miR-370  | 13240 | 2494 | 0 |
| miR-370  | 11887 | 2548 | 0 |
| miR-370  | 14207 | 2506 | 0 |
| miR-371  | 5865  | 2726 | 0 |
| miR-371  | 6220  | 2845 | 0 |
| miR-371  | 5439  | 2723 | 0 |
| miR-372  | 4177  | 2604 | 0 |
| miR-372  | 4730  | 2641 | 0 |
| miR-372  | 4209  | 2642 | 0 |
| miR-373  | 4616  | 2722 | 0 |
| miR-373  | 4913  | 2785 | 0 |
| miR-373  | 4606  | 2727 | 0 |
| miR-373* | 5272  | 2603 | 0 |
| miR-373* | 5511  | 2669 | 0 |
| miR-373* | 5340  | 2672 | 0 |
| miR-374  | 5521  | 2860 | 0 |
| miR-374  | 5312  | 2896 | 0 |
| miR-374  | 5359  | 2825 | 0 |
| miR-375  | 5725  | 2602 | 0 |
| miR-375  | 5284  | 2665 | 0 |
| miR-375  | 5791  | 2645 | 0 |
| miR-376a | 5097  | 2783 | 0 |
| miR-376a | 4700  | 2766 | 0 |
| miR-376a | 5193  | 2849 | 0 |
| miR-376b | 4226  | 2578 | 0 |
| miR-376b | 3967  | 2684 | 0 |
| miR-376b | 4214  | 2642 | 0 |
| miR-377  | 4904  | 2688 | 0 |
| miR-377  | 4355  | 2448 | 0 |
| miR-377  | 4918  | 2683 | 0 |



|            |       |      |   |
|------------|-------|------|---|
| miR-378    | 11006 | 2526 | 0 |
| miR-378    | 14992 | 2537 | 0 |
| miR-378    | 11403 | 2592 | 0 |
| miR-379    | 4811  | 2630 | 0 |
| miR-379    | 4806  | 2532 | 0 |
| miR-379    | 4871  | 2613 | 0 |
| miR-38     | 2706  | 2154 | 0 |
| miR-38     | 2651  | 2120 | 0 |
| miR-38     | 2584  | 2095 | 0 |
| miR-380-3p | 7183  | 2650 | 0 |
| miR-380-3p | 8220  | 2717 | 0 |
| miR-380-3p | 7085  | 2683 | 0 |
| miR-380-5p | 5387  | 2636 | 0 |
| miR-380-5p | 5385  | 2595 | 0 |
| miR-380-5p | 5343  | 2615 | 0 |
| miR-381    | 5812  | 2665 | 0 |
| miR-381    | 6526  | 2739 | 0 |
| miR-381    | 6192  | 2715 | 0 |
| miR-382    | 5366  | 2540 | 0 |
| miR-382    | 5286  | 2628 | 0 |
| miR-382    | 5213  | 2573 | 0 |
| miR-383    | 6166  | 2504 | 0 |
| miR-383    | 5578  | 2543 | 0 |
| miR-383    | 6464  | 2551 | 0 |
| miR-384    | 5315  | 2709 | 0 |
| miR-384    | 5459  | 2812 | 0 |
| miR-384    | 5826  | 2741 | 0 |
| miR-39     | 2821  | 2068 | 0 |
| miR-39     | 2669  | 2005 | 0 |
| miR-39     | 2651  | 2004 | 0 |
| miR-4      | 3766  | 2386 | 0 |
| miR-4      | 4859  | 2718 | 0 |
| miR-4      | 3705  | 2382 | 0 |
| miR-40     | 2773  | 2129 | 0 |
| miR-40     | 2785  | 2142 | 0 |
| miR-40     | 2687  | 2078 | 0 |
| miR-409    | 5951  | 2577 | 0 |
| miR-409    | 7504  | 2629 | 0 |
| miR-409    | 6553  | 2634 | 0 |
| miR-41     | 2833  | 2078 | 0 |
| miR-41     | 2637  | 2026 | 0 |
| miR-41     | 2726  | 2014 | 0 |
| miR-410    | 5903  | 2705 | 0 |
| miR-410    | 6124  | 2798 | 0 |
| miR-410    | 5817  | 2721 | 0 |
| miR-411    | 4759  | 2629 | 0 |

|          |      |      |   |
|----------|------|------|---|
| miR-411  | 4706 | 2676 | 0 |
| miR-411  | 4886 | 2666 | 0 |
| miR-412  | 6214 | 2807 | 0 |
| miR-412  | 5913 | 2891 | 0 |
| miR-412  | 5858 | 2807 | 0 |
| miR-42   | 6066 | 2638 | 0 |
| miR-42   | 6133 | 2675 | 0 |
| miR-42   | 6012 | 2749 | 0 |
| miR-425  | 5984 | 2790 | 0 |
| miR-425  | 7134 | 2731 | 0 |
| miR-425  | 7169 | 2905 | 0 |
| miR-429  | 5798 | 2878 | 0 |
| miR-429  | 5861 | 2897 | 0 |
| miR-429  | 5712 | 2890 | 0 |
| miR-43   | 3469 | 2666 | 0 |
| miR-43   | 3508 | 2663 | 0 |
| miR-43   | 3449 | 2700 | 0 |
| miR-430a | 4985 | 2736 | 0 |
| miR-430a | 4678 | 2763 | 0 |
| miR-430a | 4827 | 2798 | 0 |
| miR-430b | 4695 | 2849 | 0 |
| miR-430b | 4638 | 2865 | 0 |
| miR-430b | 4693 | 2830 | 0 |
| miR-430c | 4421 | 2638 | 0 |
| miR-430c | 4642 | 2913 | 0 |
| miR-430c | 4557 | 2740 | 0 |
| miR-44   | 3377 | 2675 | 0 |
| miR-44   | 3258 | 2624 | 0 |
| miR-44   | 3379 | 2751 | 0 |
| miR-448  | 4258 | 2686 | 0 |
| miR-448  | 5156 | 2849 | 0 |
| miR-448  | 4786 | 2711 | 0 |
| miR-449  | 5198 | 2779 | 0 |
| miR-449  | 5101 | 2729 | 0 |
| miR-449  | 5370 | 2787 | 0 |
| miR-450  | 5228 | 2434 | 0 |
| miR-450  | 5096 | 2624 | 0 |
| miR-450  | 5210 | 2461 | 0 |
| miR-46   | 3462 | 2665 | 0 |
| miR-46   | 3526 | 2649 | 0 |
| miR-46   | 3472 | 2708 | 0 |
| miR-47   | 3422 | 2733 | 0 |
| miR-47   | 3205 | 2570 | 0 |
| miR-47   | 3440 | 2759 | 0 |
| miR-48   | 3377 | 2693 | 0 |
| miR-48   | 3470 | 2639 | 0 |
| miR-48   | 3492 | 2695 | 0 |
| miR-49   | 4798 | 2771 | 0 |
| miR-49   | 4321 | 2510 | 0 |

|         |      |      |   |
|---------|------|------|---|
| miR-49  | 4956 | 2738 | 0 |
| miR-5   | 5742 | 2670 | 0 |
| miR-5   | 5569 | 2744 | 0 |
| miR-5   | 5751 | 2702 | 0 |
| miR-50  | 3459 | 2690 | 0 |
| miR-50  | 3240 | 2639 | 0 |
| miR-50  | 3509 | 2713 | 0 |
| miR-51  | 2713 | 2145 | 0 |
| miR-51  | 2692 | 2158 | 0 |
| miR-51  | 2679 | 2079 | 0 |
| miR-52  | 5305 | 2104 | 0 |
| miR-52  | 5186 | 2059 | 0 |
| miR-52  | 5402 | 2029 | 0 |
| miR-53  | 4506 | 2164 | 0 |
| miR-53  | 4618 | 2158 | 0 |
| miR-53  | 4549 | 2094 | 0 |
| miR-54  | 2780 | 2097 | 0 |
| miR-54  | 2677 | 2068 | 0 |
| miR-54  | 2682 | 2054 | 0 |
| miR-55  | 2660 | 2150 | 0 |
| miR-55  | 2730 | 2150 | 0 |
| miR-55  | 2663 | 2094 | 0 |
| miR-56* | 2686 | 2158 | 0 |
| miR-56* | 2693 | 2152 | 0 |
| miR-56* | 2629 | 2107 | 0 |
| miR-56  | 2771 | 2076 | 0 |
| miR-56  | 2697 | 2074 | 0 |
| miR-56  | 2724 | 2042 | 0 |
| miR-57  | 2776 | 2081 | 0 |
| miR-57  | 2720 | 2096 | 0 |
| miR-57  | 2789 | 2051 | 0 |
| miR-58  | 3481 | 2755 | 0 |
| miR-58  | 3069 | 2505 | 0 |
| miR-58  | 3395 | 2737 | 0 |
| miR-59  | 3462 | 2707 | 0 |
| miR-59  | 3524 | 2637 | 0 |
| miR-59  | 3505 | 2737 | 0 |
| miR-6   | 3083 | 2410 | 0 |
| miR-6   | 3489 | 2774 | 0 |
| miR-6   | 3034 | 2450 | 0 |
| miR-60  | 3454 | 2765 | 0 |
| miR-60  | 3107 | 2514 | 0 |
| miR-60  | 3413 | 2722 | 0 |
| miR-61  | 3497 | 2725 | 0 |
| miR-61  | 3463 | 2605 | 0 |
| miR-61  | 3546 | 2751 | 0 |
| miR-62  | 3390 | 2750 | 0 |
| miR-62  | 3011 | 2484 | 0 |
| miR-62  | 3351 | 2740 | 0 |

|        |      |      |   |
|--------|------|------|---|
| miR-63 | 5325 | 2732 | 0 |
| miR-63 | 5584 | 2652 | 0 |
| miR-63 | 5382 | 2779 | 0 |
| miR-64 | 4156 | 2765 | 0 |
| miR-64 | 3594 | 2470 | 0 |
| miR-64 | 4480 | 2773 | 0 |
| miR-65 | 5133 | 2751 | 0 |
| miR-65 | 5455 | 2697 | 0 |
| miR-65 | 5147 | 2800 | 0 |
| miR-66 | 7571 | 2151 | 0 |
| miR-66 | 7523 | 2153 | 0 |
| miR-66 | 7567 | 2083 | 0 |
| miR-67 | 3608 | 2096 | 0 |
| miR-67 | 3640 | 2125 | 0 |
| miR-67 | 3548 | 2049 | 0 |
| miR-68 | 3840 | 2141 | 0 |
| miR-68 | 3634 | 2164 | 0 |
| miR-68 | 3695 | 2059 | 0 |
| miR-69 | 6796 | 2105 | 0 |
| miR-69 | 6870 | 2125 | 0 |
| miR-69 | 6729 | 2034 | 0 |
| miR-7a | 3595 | 2675 | 0 |
| miR-7a | 3686 | 2753 | 0 |
| miR-7a | 3663 | 2711 | 0 |
| miR-70 | 2695 | 2108 | 0 |
| miR-70 | 2611 | 2140 | 0 |
| miR-70 | 2603 | 2070 | 0 |
| miR-71 | 3988 | 2072 | 0 |
| miR-71 | 3978 | 2087 | 0 |
| miR-71 | 3890 | 2028 | 0 |
| miR-72 | 3793 | 2114 | 0 |
| miR-72 | 3608 | 2087 | 0 |
| miR-72 | 3826 | 2043 | 0 |
| miR-73 | 2555 | 2066 | 0 |
| miR-73 | 2626 | 2101 | 0 |
| miR-73 | 2673 | 2012 | 0 |
| miR-74 | 4429 | 2802 | 0 |
| miR-74 | 3658 | 2422 | 0 |
| miR-74 | 4424 | 2756 | 0 |
| miR-75 | 7307 | 2729 | 0 |
| miR-75 | 7810 | 2660 | 0 |
| miR-75 | 7167 | 2776 | 0 |
| miR-76 | 5007 | 2756 | 0 |
| miR-76 | 3966 | 2389 | 0 |
| miR-76 | 5192 | 2724 | 0 |
| miR-77 | 3417 | 2694 | 0 |
| miR-77 | 3346 | 2644 | 0 |
| miR-77 | 3513 | 2756 | 0 |
| miR-78 | 3350 | 2725 | 0 |

|           |      |      |   |
|-----------|------|------|---|
| miR-78    | 2862 | 2380 | 0 |
| miR-78    | 3481 | 2758 | 0 |
| miR-79    | 5608 | 2697 | 0 |
| miR-79    | 5693 | 2652 | 0 |
| miR-79    | 5679 | 2750 | 0 |
| miR-8     | 2741 | 2195 | 0 |
| miR-8     | 2701 | 2137 | 0 |
| miR-8     | 2612 | 2108 | 0 |
| miR-80    | 9116 | 2683 | 0 |
| miR-80    | 9881 | 2325 | 0 |
| miR-80    | 9509 | 2755 | 0 |
| miR-81    | 3515 | 2737 | 0 |
| miR-81    | 3564 | 2705 | 0 |
| miR-81    | 3534 | 2746 | 0 |
| miR-83    | 4168 | 2326 | 0 |
| miR-83    | 5336 | 2632 | 0 |
| miR-83    | 4235 | 2348 | 0 |
| miR-84    | 4764 | 2682 | 0 |
| miR-84    | 4771 | 2629 | 0 |
| miR-84    | 4807 | 2713 | 0 |
| miR-85    | 3896 | 2332 | 0 |
| miR-85    | 4779 | 2633 | 0 |
| miR-85    | 3978 | 2350 | 0 |
| miR-86    | 5257 | 2701 | 0 |
| miR-86    | 5095 | 2606 | 0 |
| miR-86    | 5093 | 2720 | 0 |
| miR-87    | 4274 | 2385 | 0 |
| miR-87    | 4576 | 2733 | 0 |
| miR-87    | 4187 | 2382 | 0 |
| miR-88    | 5837 | 2709 | 0 |
| miR-88    | 5682 | 2588 | 0 |
| miR-88    | 6471 | 2713 | 0 |
| miR-89    | 4043 | 2424 | 0 |
| miR-89    | 4515 | 2709 | 0 |
| miR-89    | 4166 | 2444 | 0 |
| miR-9     | 2753 | 2117 | 0 |
| miR-9     | 2864 | 2071 | 0 |
| miR-9     | 2802 | 2074 | 0 |
| miR-90    | 5431 | 2686 | 0 |
| miR-90    | 5368 | 2574 | 0 |
| miR-90    | 5731 | 2688 | 0 |
| miR-17-5p | 3423 | 2644 | 0 |
| miR-17-5p | 3380 | 2593 | 0 |
| miR-17-5p | 3305 | 2674 | 0 |
| miR-92    | 6025 | 2525 | 0 |
| miR-92    | 8659 | 2614 | 0 |
| miR-92    | 7255 | 2546 | 0 |
| miR-93    | 5011 | 2678 | 0 |
| miR-93    | 5736 | 2636 | 0 |

|               |      |      |   |
|---------------|------|------|---|
| miR-93        | 4881 | 2735 | 0 |
| miR-94        | 5775 | 2486 | 0 |
| miR-94        | 6917 | 2639 | 0 |
| miR-94        | 6100 | 2550 | 0 |
| miR-95        | 4288 | 2695 | 0 |
| miR-95        | 5085 | 2608 | 0 |
| miR-95        | 4331 | 2761 | 0 |
| miR-96        | 5723 | 2487 | 0 |
| miR-96        | 7010 | 2622 | 0 |
| miR-96        | 6157 | 2519 | 0 |
| miR-30a-5p    | 5160 | 2701 | 0 |
| miR-30a-5p    | 6255 | 2589 | 0 |
| miR-30a-5p    | 5258 | 2734 | 0 |
| miR-98        | 7386 | 2469 | 0 |
| miR-98        | 8668 | 2552 | 0 |
| miR-98        | 7569 | 2490 | 0 |
| miR-99a       | 4947 | 2461 | 0 |
| miR-99a       | 5390 | 2601 | 0 |
| miR-99a       | 4963 | 2451 | 0 |
| miR-99b       | 6669 | 2676 | 0 |
| miR-99b       | 6731 | 2601 | 0 |
| miR-99b       | 6913 | 2671 | 0 |
| PsA-NAD-dehyd | 5496 | 2805 | 0 |
| PsA-NAD-dehyd | 5201 | 2802 | 0 |
| PsA-NAD-dehyd | 5356 | 2812 | 0 |

**Post-Regeneration**

| Name         | F635<br>Median | B635<br>Median | Flags | Name         | F635<br>Median | B635<br>Median | Flags | Name         | F635<br>Median | B635<br>Median | Flags |
|--------------|----------------|----------------|-------|--------------|----------------|----------------|-------|--------------|----------------|----------------|-------|
| APC          | 2446           | 1667           | 0     | APC          | 9506           | 8481           | 0     | APC          | 8923           | 5492           | 0     |
| APC          | 2646           | 1729           | 0     | APC          | 9537           | 8265           | 0     | APC          | 9573           | 6125           | 0     |
| APC          | 2692           | 1764           | 0     | APC          | 10893          | 9598           | 0     | APC          | 8789           | 5997           | 0     |
| beta-actin   | 5242           | 2703           | 0     | beta-actin   | 12822          | 7456           | 0     | beta-actin   | 19669          | 7125           | 0     |
| beta-actin   | 5547           | 2848           | 0     | beta-actin   | 12959          | 7173           | 0     | beta-actin   | 17637          | 6395           | 0     |
| beta-actin   | 5509           | 2686           | 0     | beta-actin   | 13435          | 7661           | 0     | beta-actin   | 19623          | 7045           | 0     |
| beta-catenin | 5700           | 1637           | 0     | beta-catenin | 43635          | 7960           | 0     | beta-catenin | 13303          | 5653           | 0     |
| beta-catenin | 5355           | 1687           | 0     | beta-catenin | 40817          | 8529           | 0     | beta-catenin | 15392          | 6006           | 0     |
| beta-catenin | 6038           | 1706           | 0     | beta-catenin | 48221          | 8590           | 0     | beta-catenin | 14918          | 5938           | 0     |
| Dr18srRNA    | 3559           | 2355           | 0     | Dr18srRNA    | 11408          | 8030           | 0     | Dr18srRNA    | 14166          | 7580           | 0     |
| Dr18srRNA    | 3970           | 2389           | 0     | Dr18srRNA    | 9651           | 6924           | 0     | Dr18srRNA    | 11218          | 6287           | 0     |
| Dr18srRNA    | 3598           | 2399           | 0     | Dr18srRNA    | 11245          | 8045           | 0     | Dr18srRNA    | 14119          | 7372           | 0     |
| let7a1long   | 18583          | 1716           | 0     | let7a1long   | 31429          | 6328           | 0     | let7a1long   | 34437          | 5490           | 0     |
| let7a1long   | 11000          | 1844           | 0     | let7a1long   | 36972          | 6752           | 0     | let7a1long   | 41990          | 5847           | 0     |
| let7a1long   | 19326          | 1683           | 0     | let7a1long   | 33642          | 6663           | 0     | let7a1long   | 42043          | 5700           | 0     |

|             |       |      |     |             |       |       |     |             |       |      |   |
|-------------|-------|------|-----|-------------|-------|-------|-----|-------------|-------|------|---|
| let7a1mm2   | 3147  | 1643 | 0   | let7a1mm2   | 15678 | 8140  | 0   | let7a1mm2   | 9680  | 5985 | 0 |
| let7a1mm2   | 3841  | 1723 | 0   | let7a1mm2   | 19474 | 8962  | 0   | let7a1mm2   | 9444  | 5906 | 0 |
| let7a1mm2   | 3254  | 1706 | 0   | let7a1mm2   | 15958 | 8399  | 0   | let7a1mm2   | 10247 | 6225 | 0 |
| let7a1mm6   | 2853  | 1715 | 0   | let7a1mm6   | 17980 | 9428  | 0   | let7a1mm6   | 8141  | 5941 | 0 |
| let7a1mm6   | 2997  | 1780 | 0   | let7a1mm6   | 18614 | 10025 | 0   | let7a1mm6   | 8925  | 6179 | 0 |
| let7a1mm6   | 3266  | 1796 | 0   | let7a1mm6   | 19378 | 10042 | 0   | let7a1mm6   | 9424  | 6292 | 0 |
| let7a1short | 22118 | 2249 | 0   | let7a1short | 29310 | 7292  | 0   | let7a1short | 35125 | 7244 | 0 |
| let7a1short | 26134 | 2295 | 0   | let7a1short | 28030 | 6924  | 0   | let7a1short | 28097 | 6377 | 0 |
| let7a1short | 22412 | 2255 | 0   | let7a1short | 30670 | 7287  | 0   | let7a1short | 36217 | 7050 | 0 |
| let-7b      | 5923  | 2516 | 0   | let-7b      | 9725  | 5507  | 0   | let-7b      | 7468  | 3591 | 0 |
| let-7b      | 6424  | 2540 | 0   | let-7b      | 12088 | 5839  | 0   | let-7b      | 8490  | 3423 | 0 |
| let-7b      | 5634  | 2567 | 0   | let-7b      | 10276 | 5525  | 0   | let-7b      | 7244  | 3566 | 0 |
| let7c       | 13990 | 2468 | 0   | let7c       | 14990 | 6490  | 0   | let7c       | 12464 | 3650 | 0 |
| let7c       | 15898 | 2489 | 0   | let7c       | 12286 | 5994  | 0   | let7c       | 11885 | 3728 | 0 |
| let7c       | 13240 | 2449 | 0   | let7c       | 14702 | 6358  | 0   | let7c       | 11498 | 3526 | 0 |
| let-7d      | 3267  | 2650 | 0   | let-7d      | 0     | 0     | -50 | let-7d      | 4529  | 3625 | 0 |
| let-7d      | 3917  | 2604 | 0   | let-7d      | 0     | 0     | -50 | let-7d      | 4489  | 3448 | 0 |
| let-7d      | 3326  | 2760 | 0   | let-7d      | 0     | 0     | -50 | let-7d      | 4257  | 3596 | 0 |
| let-7e      | 6369  | 2434 | 0   | let-7e      | 8730  | 6459  | 0   | let-7e      | 10836 | 3672 | 0 |
| let-7e      | 7207  | 2528 | 0   | let-7e      | 9995  | 6110  | 0   | let-7e      | 9766  | 3689 | 0 |
| let-7e      | 6567  | 2455 | 0   | let-7e      | 8044  | 6341  | 0   | let-7e      | 10197 | 3528 | 0 |
| let7f       | 0     | 0    | -50 | let7f       | 6505  | 5863  | 0   | let7f       | 4757  | 3637 | 0 |
| let7f       | 0     | 0    | -50 | let7f       | 6452  | 5857  | 0   | let7f       | 5119  | 3572 | 0 |
| let7f       | 0     | 0    | -50 | let7f       | 6284  | 5820  | 0   | let7f       | 4488  | 3580 | 0 |
| let-7g      | 8367  | 2479 | 0   | let-7g      | 10905 | 6631  | 0   | let-7g      | 10663 | 3724 | 0 |
| let-7g      | 9033  | 2590 | 0   | let-7g      | 10758 | 6312  | 0   | let-7g      | 9373  | 3728 | 0 |
| let-7g      | 8463  | 2525 | 0   | let-7g      | 9965  | 6419  | 0   | let-7g      | 9618  | 3530 | 0 |
| mmu-let-7g  | 4800  | 2548 | 0   | mmu-let-7g  | 8048  | 5885  | 0   | mmu-let-7g  | 7782  | 3662 | 0 |
| mmu-let-7g  | 5525  | 2647 | 0   | mmu-let-7g  | 7611  | 5853  | 0   | mmu-let-7g  | 9567  | 3694 | 0 |
| mmu-let-7g  | 5999  | 2672 | 0   | mmu-let-7g  | 7627  | 5852  | 0   | mmu-let-7g  | 6720  | 3606 | 0 |
| let-7i      | 5581  | 2498 | 0   | let-7i      | 8138  | 6582  | 0   | let-7i      | 11097 | 3714 | 0 |
| let-7i      | 6159  | 2537 | 0   | let-7i      | 8494  | 6298  | 0   | let-7i      | 7526  | 3693 | 0 |
| let-7i      | 6007  | 2514 | 0   | let-7i      | 7416  | 6408  | 0   | let-7i      | 9386  | 3491 | 0 |
| lin4        | 7398  | 2448 | 0   | lin4        | 10543 | 5955  | 0   | lin4        | 14039 | 5733 | 0 |
| lin4        | 7742  | 2236 | 0   | lin4        | 16255 | 6872  | 0   | lin4        | 20955 | 6466 | 0 |
| lin4        | 7617  | 2476 | 0   | lin4        | 9830  | 5772  | 0   | lin4        | 13712 | 5664 | 0 |
| Lycopene    | 6988  | 1675 | 0   | Lycopene    | 15379 | 6552  | 0   | Lycopene    | 14664 | 5626 | 0 |
| Lycopene    | 7126  | 1798 | 0   | Lycopene    | 12918 | 6283  | 0   | Lycopene    | 15894 | 5894 | 0 |
| Lycopene    | 7131  | 1643 | 0   | Lycopene    | 16759 | 6858  | 0   | Lycopene    | 14983 | 5778 | 0 |
| miR-1       | 4544  | 2058 | 0   | miR-1       | 14241 | 8186  | 0   | miR-1       | 20032 | 7489 | 0 |
| miR-1       | 4189  | 2007 | 0   | miR-1       | 18967 | 7883  | 0   | miR-1       | 19296 | 7692 | 0 |
| miR-1       | 4350  | 2049 | 0   | miR-1       | 13912 | 8084  | 0   | miR-1       | 20318 | 7379 | 0 |
| miR-100     | 6773  | 2600 | 0   | miR-100     | 10439 | 6222  | 0   | miR-100     | 12749 | 5525 | 0 |
| miR-100     | 6545  | 2626 | 0   | miR-100     | 11101 | 6847  | 0   | miR-100     | 15083 | 5724 | 0 |
| miR-100     | 6484  | 2551 | 0   | miR-100     | 10190 | 6125  | 0   | miR-100     | 13368 | 5435 | 0 |
| miR-101a    | 7369  | 2236 | 0   | miR-101a    | 11339 | 7114  | 0   | miR-101a    | 24411 | 6408 | 0 |
| miR-101a    | 7359  | 2178 | 0   | miR-101a    | 12212 | 7515  | 0   | miR-101a    | 26282 | 6635 | 0 |
| miR-101a    | 7309  | 2203 | 0   | miR-101a    | 12872 | 7290  | 0   | miR-101a    | 24701 | 6393 | 0 |

|              |       |      |   |              |       |      |   |              |       |      |   |
|--------------|-------|------|---|--------------|-------|------|---|--------------|-------|------|---|
| miR-29b      | 6532  | 2586 | 0 | miR-29b      | 8912  | 6226 | 0 | miR-29b      | 12163 | 5521 | 0 |
| miR-29b      | 5999  | 2611 | 0 | miR-29b      | 9800  | 6782 | 0 | miR-29b      | 14046 | 5681 | 0 |
| miR-29b      | 6092  | 2537 | 0 | miR-29b      | 9095  | 6279 | 0 | miR-29b      | 12801 | 5430 | 0 |
| miR-103      | 7291  | 2217 | 0 | miR-103      | 14414 | 7191 | 0 | miR-103      | 25315 | 6426 | 0 |
| miR-103      | 7483  | 2175 | 0 | miR-103      | 14656 | 7522 | 0 | miR-103      | 25845 | 6660 | 0 |
| miR-103      | 7329  | 2211 | 0 | miR-103      | 14459 | 7249 | 0 | miR-103      | 24243 | 6357 | 0 |
| miR-21       | 7199  | 2537 | 0 | miR-21       | 9817  | 6232 | 0 | miR-21       | 14555 | 5457 | 0 |
| miR-21       | 6495  | 2590 | 0 | miR-21       | 10581 | 6668 | 0 | miR-21       | 15795 | 5627 | 0 |
| miR-21       | 6575  | 2538 | 0 | miR-21       | 9922  | 6236 | 0 | miR-21       | 15153 | 5383 | 0 |
| miR-105      | 7885  | 2237 | 0 | miR-105      | 13295 | 7132 | 0 | miR-105      | 25805 | 6441 | 0 |
| miR-105      | 7543  | 2194 | 0 | miR-105      | 11917 | 7533 | 0 | miR-105      | 25448 | 6667 | 0 |
| miR-105      | 7763  | 2214 | 0 | miR-105      | 13518 | 7288 | 0 | miR-105      | 26138 | 6357 | 0 |
| miR-106      | 7112  | 1776 | 0 | miR-106      | 13085 | 5865 | 0 | miR-106      | 11731 | 5714 | 0 |
| miR-106      | 7886  | 1623 | 0 | miR-106      | 17702 | 6815 | 0 | miR-106      | 14316 | 5828 | 0 |
| miR-106      | 7494  | 1868 | 0 | miR-106      | 13649 | 6176 | 0 | miR-106      | 11699 | 5772 | 0 |
| miR-107      | 5013  | 1545 | 0 | miR-107      | 24330 | 6708 | 0 | miR-107      | 11613 | 5383 | 0 |
| miR-107      | 4687  | 1571 | 0 | miR-107      | 23652 | 6532 | 0 | miR-107      | 12322 | 5536 | 0 |
| miR-107      | 5037  | 1627 | 0 | miR-107      | 26177 | 7017 | 0 | miR-107      | 12652 | 5679 | 0 |
| miR-108      | 3587  | 1742 | 0 | miR-108      | 9116  | 5851 | 0 | miR-108      | 7951  | 5719 | 0 |
| miR-108      | 3713  | 1631 | 0 | miR-108      | 12099 | 6753 | 0 | miR-108      | 8993  | 5866 | 0 |
| miR-108      | 3886  | 1825 | 0 | miR-108      | 9540  | 6192 | 0 | miR-108      | 8124  | 5760 | 0 |
| miR-109      | 5683  | 1528 | 0 | miR-109      | 24676 | 6554 | 0 | miR-109      | 9631  | 5441 | 0 |
| miR-109      | 5975  | 1562 | 0 | miR-109      | 24053 | 6548 | 0 | miR-109      | 9839  | 5512 | 0 |
| miR-109      | 5766  | 1597 | 0 | miR-109      | 29637 | 7024 | 0 | miR-109      | 10956 | 5658 | 0 |
| miR-10a      | 7056  | 2609 | 0 | miR-10a      | 8320  | 5864 | 0 | miR-10a      | 9685  | 3603 | 0 |
| miR-10a      | 6396  | 2657 | 0 | miR-10a      | 9533  | 5885 | 0 | miR-10a      | 12497 | 3436 | 0 |
| miR-10a      | 7486  | 2669 | 0 | miR-10a      | 8437  | 5809 | 0 | miR-10a      | 9620  | 3558 | 0 |
| miR-10b      | 5638  | 2396 | 0 | miR-10b      | 9293  | 6441 | 0 | miR-10b      | 11849 | 3643 | 0 |
| miR-10b      | 6441  | 2404 | 0 | miR-10b      | 9147  | 6348 | 0 | miR-10b      | 11205 | 3601 | 0 |
| miR-10b      | 5572  | 2431 | 0 | miR-10b      | 9109  | 6469 | 0 | miR-10b      | 9688  | 3419 | 0 |
| miR-10blong  | 2581  | 1860 | 0 | miR-10blong  | 13106 | 7386 | 0 | miR-10blong  | 8367  | 5883 | 0 |
| miR-10blong  | 2708  | 1975 | 0 | miR-10blong  | 12210 | 7511 | 0 | miR-10blong  | 8782  | 6097 | 0 |
| miR-10blong  | 2561  | 1858 | 0 | miR-10blong  | 12737 | 7569 | 0 | miR-10blong  | 8873  | 6032 | 0 |
| miR-10b-mm2  | 4480  | 2738 | 0 | miR-10b-mm2  | 9419  | 6980 | 0 | miR-10b-mm2  | 10855 | 6096 | 0 |
| miR-10b-mm2  | 4473  | 2530 | 0 | miR-10b-mm2  | 10477 | 7381 | 0 | miR-10b-mm2  | 14793 | 6993 | 0 |
| miR-10b-mm2  | 4593  | 2730 | 0 | miR-10b-mm2  | 9476  | 7122 | 0 | miR-10b-mm2  | 11116 | 5941 | 0 |
| miR-10b-mm6  | 4582  | 2788 | 0 | miR-10b-mm6  | 10319 | 7063 | 0 | miR-10b-mm6  | 14568 | 6545 | 0 |
| miR-10b-mm6  | 4639  | 2756 | 0 | miR-10b-mm6  | 11345 | 7470 | 0 | miR-10b-mm6  | 16548 | 6828 | 0 |
| miR-10b-mm6  | 4587  | 2814 | 0 | miR-10b-mm6  | 10560 | 7114 | 0 | miR-10b-mm6  | 14808 | 6402 | 0 |
| miR-10bshort | 4803  | 2390 | 0 | miR-10bshort | 12323 | 7547 | 0 | miR-10bshort | 17290 | 7590 | 0 |
| miR-10bshort | 4958  | 2420 | 0 | miR-10bshort | 12353 | 7774 | 0 | miR-10bshort | 16202 | 7075 | 0 |
| miR-10bshort | 4862  | 2431 | 0 | miR-10bshort | 12184 | 7738 | 0 | miR-10bshort | 18315 | 7298 | 0 |
| miR-11       | 10689 | 2634 | 0 | miR-11       | 8621  | 5878 | 0 | miR-11       | 13664 | 3565 | 0 |



|              |       |      |   |              |       |      |     |              |       |      |   |
|--------------|-------|------|---|--------------|-------|------|-----|--------------|-------|------|---|
| miR-11       | 9170  | 2649 | 0 | miR-11       | 8936  | 5796 | 0   | miR-11       | 14814 | 3387 | 0 |
| miR-11       | 11945 | 2598 | 0 | miR-11       | 8200  | 5782 | 0   | miR-11       | 12327 | 3538 | 0 |
| miR-110      | 5734  | 1723 | 0 | miR-110      | 21754 | 5726 | 0   | miR-110      | 13688 | 5579 | 0 |
| miR-110      | 5675  | 1617 | 0 | miR-110      | 26615 | 6424 | 0   | miR-110      | 15562 | 5705 | 0 |
| miR-110      | 6097  | 1796 | 0 | miR-110      | 23224 | 6022 | 0   | miR-110      | 14938 | 5673 | 0 |
| miR-19a      | 3680  | 1527 | 0 | miR-19a      | 22340 | 6413 | 0   | miR-19a      | 9808  | 5492 | 0 |
| miR-19a      | 3551  | 1548 | 0 | miR-19a      | 21432 | 6542 | 0   | miR-19a      | 9967  | 5509 | 0 |
| miR-19a      | 3785  | 1593 | 0 | miR-19a      | 24114 | 6915 | 0   | miR-19a      | 10491 | 5668 | 0 |
| miR-112      | 3778  | 1667 | 0 | miR-112      | 13745 | 5658 | 0   | miR-112      | 10253 | 5536 | 0 |
| miR-112      | 3848  | 1599 | 0 | miR-112      | 16123 | 6185 | 0   | miR-112      | 10939 | 5580 | 0 |
| miR-112      | 4004  | 1754 | 0 | miR-112      | 14563 | 5949 | 0   | miR-112      | 11403 | 5609 | 0 |
| miR-113      | 4886  | 1527 | 0 | miR-113      | 22304 | 6350 | 0   | miR-113      | 9712  | 5461 | 0 |
| miR-113      | 4831  | 1546 | 0 | miR-113      | 24336 | 6490 | 0   | miR-113      | 9174  | 5524 | 0 |
| miR-113      | 4989  | 1583 | 0 | miR-113      | 24181 | 6902 | 0   | miR-113      | 9810  | 5707 | 0 |
| miR-114      | 7345  | 2567 | 0 | miR-114      | 8772  | 6272 | 0   | miR-114      | 11993 | 5508 | 0 |
| miR-114      | 6777  | 2583 | 0 | miR-114      | 9496  | 6573 | 0   | miR-114      | 13628 | 5618 | 0 |
| miR-114      | 7250  | 2572 | 0 | miR-114      | 8707  | 6154 | 0   | miR-114      | 13581 | 5381 | 0 |
| miR-115      | 7569  | 2263 | 0 | miR-115      | 10682 | 7204 | 0   | miR-115      | 23771 | 6492 | 0 |
| miR-115      | 7233  | 2225 | 0 | miR-115      | 11091 | 7465 | 0   | miR-115      | 24231 | 6637 | 0 |
| miR-115      | 7345  | 2227 | 0 | miR-115      | 11801 | 7357 | 0   | miR-115      | 24694 | 6391 | 0 |
| miR-116      | 7682  | 2597 | 0 | miR-116      | 8349  | 6274 | 0   | miR-116      | 11201 | 5564 | 0 |
| miR-116      | 6677  | 2626 | 0 | miR-116      | 8825  | 6531 | 0   | miR-116      | 12533 | 5596 | 0 |
| miR-116      | 7068  | 2558 | 0 | miR-116      | 8353  | 6267 | 0   | miR-116      | 12482 | 5409 | 0 |
| miR-117      | 7636  | 2316 | 0 | miR-117      | 10989 | 7148 | 0   | miR-117      | 24701 | 6497 | 0 |
| miR-117      | 7282  | 2232 | 0 | miR-117      | 10922 | 7251 | 0   | miR-117      | 24051 | 6606 | 0 |
| miR-117      | 7440  | 2224 | 0 | miR-117      | 11953 | 7348 | 0   | miR-117      | 24704 | 6449 | 0 |
| miR-118      | 6462  | 2575 | 0 | miR-118      | 8613  | 6302 | 0   | miR-118      | 11643 | 5512 | 0 |
| miR-118      | 6184  | 2639 | 0 | miR-118      | 8525  | 6474 | 0   | miR-118      | 12725 | 5524 | 0 |
| miR-118      | 5997  | 2579 | 0 | miR-118      | 8315  | 6429 | 0   | miR-118      | 12654 | 5411 | 0 |
| miR-119      | 7798  | 2214 | 0 | miR-119      | 10413 | 7073 | 0   | miR-119      | 24221 | 6490 | 0 |
| miR-119      | 7707  | 2197 | 0 | miR-119      | 10831 | 7084 | 0   | miR-119      | 23940 | 6495 | 0 |
| miR-119      | 7753  | 2189 | 0 | miR-119      | 10413 | 7181 | 0   | miR-119      | 23798 | 6393 | 0 |
| miR-12       | 3056  | 2326 | 0 | miR-12       | 0     | 0    | -50 | miR-12       | 5046  | 3632 | 0 |
| miR-12       | 3381  | 2371 | 0 | miR-12       | 0     | 0    | -50 | miR-12       | 5008  | 3587 | 0 |
| miR-12       | 3082  | 2404 | 0 | miR-12       | 0     | 0    | -50 | miR-12       | 4371  | 3413 | 0 |
| miR-120      | 7613  | 2620 | 0 | miR-120      | 8788  | 6305 | 0   | miR-120      | 13783 | 5522 | 0 |
| miR-120      | 7765  | 2625 | 0 | miR-120      | 8873  | 6470 | 0   | miR-120      | 15156 | 5498 | 0 |
| miR-120      | 7276  | 2549 | 0 | miR-120      | 8716  | 6492 | 0   | miR-120      | 15145 | 5406 | 0 |
| miR-121      | 8329  | 2173 | 0 | miR-121      | 13013 | 6923 | 0   | miR-121      | 28633 | 6507 | 0 |
| miR-121      | 8196  | 2159 | 0 | miR-121      | 13475 | 7059 | 0   | miR-121      | 29610 | 6464 | 0 |
| miR-121      | 8229  | 2189 | 0 | miR-121      | 13846 | 7145 | 0   | miR-121      | 29937 | 6435 | 0 |
| miR-122      | 3856  | 1618 | 0 | miR-122      | 10559 | 5658 | 0   | miR-122      | 8983  | 5506 | 0 |
| miR-122      | 3817  | 1612 | 0 | miR-122      | 12602 | 6122 | 0   | miR-122      | 9710  | 5562 | 0 |
| miR-122      | 4223  | 1720 | 0 | miR-122      | 10781 | 5948 | 0   | miR-122      | 9443  | 5624 | 0 |
| miR-126*     | 4646  | 1536 | 0 | miR-126*     | 17616 | 6309 | 0   | miR-126*     | 8471  | 5465 | 0 |
| miR-126*     | 4657  | 1522 | 0 | miR-126*     | 19002 | 6432 | 0   | miR-126*     | 8737  | 5575 | 0 |
| miR-126*     | 4757  | 1586 | 0 | miR-126*     | 21107 | 6949 | 0   | miR-126*     | 9527  | 5735 | 0 |
| miR-124along | 2985  | 1977 | 0 | miR-124along | 12747 | 7624 | 0   | miR-124along | 8025  | 6140 | 0 |
| miR-         | 2811  | 1921 | 0 | miR-         | 13183 | 8025 | 0   | miR-         | 8078  | 6146 | 0 |

| 124along      |      |      | 124along |               |       | 124along |   |               |       |      |   |
|---------------|------|------|----------|---------------|-------|----------|---|---------------|-------|------|---|
| miR-124along  | 3008 | 2012 | 0        | miR-124along  | 12525 | 7719     | 0 | miR-124along  | 8561  | 6428 | 0 |
| miR-124ashort | 6772 | 2418 | 0        | miR-124ashort | 13587 | 7717     | 0 | miR-124ashort | 19982 | 6937 | 0 |
| miR-124ashort | 7061 | 2447 | 0        | miR-124ashort | 14264 | 7711     | 0 | miR-124ashort | 24642 | 7467 | 0 |
| miR-124ashort | 6912 | 2436 | 0        | miR-124ashort | 13909 | 7341     | 0 | miR-124ashort | 17988 | 6770 | 0 |
| miR-124mm2    | 2484 | 1606 | 0        | miR-124mm2    | 13378 | 7486     | 0 | miR-124mm2    | 8229  | 5970 | 0 |
| miR-124mm2    | 3043 | 1703 | 0        | miR-124mm2    | 16706 | 8383     | 0 | miR-124mm2    | 8528  | 6035 | 0 |
| miR-124mm2    | 2764 | 1685 | 0        | miR-124mm2    | 14072 | 7681     | 0 | miR-124mm2    | 9077  | 6149 | 0 |
| miR-124mm6    | 3556 | 1706 | 0        | miR-124mm6    | 17451 | 8890     | 0 | miR-124mm6    | 8204  | 6074 | 0 |
| miR-124mm6    | 3672 | 1759 | 0        | miR-124mm6    | 20267 | 9656     | 0 | miR-124mm6    | 8410  | 6084 | 0 |
| miR-124mm6    | 4125 | 1796 | 0        | miR-124mm6    | 16612 | 9457     | 0 | miR-124mm6    | 8862  | 6361 | 0 |
| miR-125a      | 4661 | 1589 | 0        | miR-125a      | 19757 | 5623     | 0 | miR-125a      | 13656 | 5460 | 0 |
| miR-125a      | 5221 | 1603 | 0        | miR-125a      | 23169 | 6020     | 0 | miR-125a      | 14136 | 5550 | 0 |
| miR-125a      | 5315 | 1735 | 0        | miR-125a      | 19348 | 5916     | 0 | miR-125a      | 14387 | 5572 | 0 |
| miR-125b      | 5045 | 1513 | 0        | miR-125b      | 22170 | 6319     | 0 | miR-125b      | 9911  | 5471 | 0 |
| miR-125b      | 5081 | 1529 | 0        | miR-125b      | 23838 | 6449     | 0 | miR-125b      | 9617  | 5552 | 0 |
| miR-125b      | 5151 | 1572 | 0        | miR-125b      | 26457 | 6952     | 0 | miR-125b      | 10801 | 5719 | 0 |
| miR-126       | 4577 | 1572 | 0        | miR-126       | 14690 | 5712     | 0 | miR-126       | 10940 | 5514 | 0 |
| miR-126       | 4642 | 1611 | 0        | miR-126       | 16680 | 6013     | 0 | miR-126       | 11812 | 5568 | 0 |
| miR-126       | 5013 | 1710 | 0        | miR-126       | 15512 | 6002     | 0 | miR-126       | 11367 | 5654 | 0 |
| miR-127       | 4485 | 1511 | 0        | miR-127       | 17564 | 6353     | 0 | miR-127       | 8205  | 5496 | 0 |
| miR-127       | 4562 | 1534 | 0        | miR-127       | 17181 | 6435     | 0 | miR-127       | 8205  | 5579 | 0 |
| miR-127       | 4517 | 1559 | 0        | miR-127       | 19322 | 6928     | 0 | miR-127       | 8949  | 5733 | 0 |
| miR-128b      | 3820 | 1576 | 0        | miR-128b      | 13995 | 5777     | 0 | miR-128b      | 10382 | 5550 | 0 |
| miR-128b      | 4008 | 1640 | 0        | miR-128b      | 14572 | 5999     | 0 | miR-128b      | 10050 | 5599 | 0 |
| miR-128b      | 4270 | 1687 | 0        | miR-128b      | 14466 | 6079     | 0 | miR-128b      | 10185 | 5699 | 0 |
| miR-129a      | 4282 | 1530 | 0        | miR-129a      | 16180 | 6408     | 0 | miR-129a      | 7811  | 5515 | 0 |
| miR-129       | 4331 | 1528 | 0        | miR-129       | 17419 | 6461     | 0 | miR-129       | 7984  | 5588 | 0 |
| miR-129a      | 4507 | 1555 | 0        | miR-129a      | 18098 | 6847     | 0 | miR-129a      | 8601  | 5740 | 0 |
| miR-129       | 7296 | 2658 | 0        | miR-129       | 9429  | 6335     | 0 | miR-129       | 14188 | 5543 | 0 |
| miR-129       | 7332 | 2623 | 0        | miR-129       | 9381  | 6447     | 0 | miR-129       | 14119 | 5476 | 0 |
| miR-129       | 6929 | 2569 | 0        | miR-129       | 9467  | 6555     | 0 | miR-129       | 14426 | 5433 | 0 |
| miR-13a       | 6381 | 2612 | 0        | miR-13a       | 8543  | 5951     | 0 | miR-13a       | 9714  | 3536 | 0 |
| miR-13a       | 6120 | 2682 | 0        | miR-13a       | 8210  | 5750     | 0 | miR-13a       | 9636  | 3399 | 0 |
| miR-13a       | 7000 | 2590 | 0        | miR-13a       | 8374  | 5786     | 0 | miR-13a       | 9140  | 3519 | 0 |
| miR-130       | 8110 | 2180 | 0        | miR-130       | 10990 | 6843     | 0 | miR-130       | 26305 | 6496 | 0 |
| miR-130       | 7986 | 2178 | 0        | miR-130       | 12085 | 7061     | 0 | miR-130       | 25867 | 6479 | 0 |
| miR-130       | 8008 | 2195 | 0        | miR-130       | 11621 | 7168     | 0 | miR-130       | 26401 | 6408 | 0 |
| miR-130a      | 3916 | 1628 | 0        | miR-130a      | 13640 | 7689     | 0 | miR-130a      | 10489 | 5591 | 0 |
| miR-130a      | 4180 | 1683 | 0        | miR-130a      | 13399 | 7561     | 0 | miR-130a      | 11211 | 5932 | 0 |
| miR-130a      | 4123 | 1706 | 0        | miR-130a      | 14949 | 8282     | 0 | miR-130a      | 10536 | 5915 | 0 |
| miR-130b      | 3603 | 1631 | 0        | miR-130b      | 13974 | 6111     | 0 | miR-130b      | 11715 | 5457 | 0 |
| miR-130b      | 3804 | 1754 | 0        | miR-130b      | 14126 | 6242     | 0 | miR-130b      | 12172 | 5658 | 0 |
| miR-130b      | 3726 | 1624 | 0        | miR-130b      | 15449 | 6408     | 0 | miR-130b      | 12035 | 5619 | 0 |

|            |       |      |   |            |       |      |   |            |       |      |   |
|------------|-------|------|---|------------|-------|------|---|------------|-------|------|---|
| miR-9*     | 4824  | 2665 | 0 | miR-9*     | 9768  | 6320 | 0 | miR-9*     | 12681 | 5553 | 0 |
| miR-9*     | 4994  | 2607 | 0 | miR-9*     | 9669  | 6376 | 0 | miR-9*     | 12607 | 5443 | 0 |
| miR-9*     | 4568  | 2579 | 0 | miR-9*     | 10160 | 6576 | 0 | miR-9*     | 12685 | 5433 | 0 |
| miR-132    | 8604  | 2205 | 0 | miR-132    | 14420 | 7070 | 0 | miR-132    | 30706 | 6591 | 0 |
| miR-132    | 8403  | 2221 | 0 | miR-132    | 13776 | 7125 | 0 | miR-132    | 29488 | 6493 | 0 |
| miR-132    | 8338  | 2202 | 0 | miR-132    | 13536 | 7167 | 0 | miR-132    | 29873 | 6433 | 0 |
| miR-133    | 12371 | 2647 | 0 | miR-133    | 14206 | 6370 | 0 | miR-133    | 25832 | 5617 | 0 |
| miR-133    | 14353 | 2590 | 0 | miR-133    | 13806 | 6322 | 0 | miR-133    | 23775 | 5453 | 0 |
| miR-133    | 11932 | 2557 | 0 | miR-133    | 13712 | 6615 | 0 | miR-133    | 29546 | 5458 | 0 |
| miR-134    | 7546  | 2238 | 0 | miR-134    | 11459 | 7348 | 0 | miR-134    | 25110 | 6728 | 0 |
| miR-134    | 7638  | 2304 | 0 | miR-134    | 11379 | 7279 | 0 | miR-134    | 24951 | 6550 | 0 |
| miR-134    | 7645  | 2238 | 0 | miR-134    | 11975 | 7289 | 0 | miR-134    | 25108 | 6561 | 0 |
| miR-135a   | 3154  | 2613 | 0 | miR-135a   | 7112  | 6475 | 0 | miR-135a   | 6896  | 5651 | 0 |
| miR-135a   | 3165  | 2562 | 0 | miR-135a   | 6736  | 6396 | 0 | miR-135a   | 6428  | 5423 | 0 |
| miR-135a   | 3007  | 2544 | 0 | miR-135a   | 7141  | 6596 | 0 | miR-135a   | 6663  | 5477 | 0 |
| miR-136    | 7407  | 2241 | 0 | miR-136    | 12702 | 7509 | 0 | miR-136    | 25163 | 6770 | 0 |
| miR-136    | 7694  | 2268 | 0 | miR-136    | 12230 | 7308 | 0 | miR-136    | 23987 | 6531 | 0 |
| miR-136    | 7582  | 2242 | 0 | miR-136    | 12008 | 7370 | 0 | miR-136    | 25204 | 6568 | 0 |
| miR-137    | 3269  | 1580 | 0 | miR-137    | 13106 | 5839 | 0 | miR-137    | 8978  | 5595 | 0 |
| miR-137    | 3168  | 1653 | 0 | miR-137    | 13719 | 5988 | 0 | miR-137    | 9133  | 5608 | 0 |
| miR-137    | 3516  | 1680 | 0 | miR-137    | 14238 | 6157 | 0 | miR-137    | 9746  | 5737 | 0 |
| miR-138    | 4508  | 1523 | 0 | miR-138    | 17420 | 6263 | 0 | miR-138    | 8541  | 5504 | 0 |
| miR-138    | 4627  | 1547 | 0 | miR-138    | 17973 | 6628 | 0 | miR-138    | 8395  | 5602 | 0 |
| miR-138    | 4637  | 1546 | 0 | miR-138    | 18641 | 6720 | 0 | miR-138    | 8862  | 5742 | 0 |
| miR-139    | 4147  | 1554 | 0 | miR-139    | 18506 | 5842 | 0 | miR-139    | 10930 | 5575 | 0 |
| miR-139    | 4373  | 1675 | 0 | miR-139    | 17165 | 5861 | 0 | miR-139    | 10690 | 5553 | 0 |
| miR-139    | 4531  | 1671 | 0 | miR-139    | 20307 | 6167 | 0 | miR-139    | 12202 | 5715 | 0 |
| miR-14     | 3013  | 2325 | 0 | miR-14     | 7058  | 6446 | 0 | miR-14     | 4974  | 3632 | 0 |
| miR-14     | 3352  | 2388 | 0 | miR-14     | 7162  | 6489 | 0 | miR-14     | 4838  | 3586 | 0 |
| miR-14     | 3160  | 2374 | 0 | miR-14     | 7034  | 6565 | 0 | miR-14     | 4552  | 3499 | 0 |
| miR-140*   | 3176  | 1544 | 0 | miR-140*   | 16145 | 5896 | 0 | miR-140*   | 10894 | 5477 | 0 |
| miR-140*   | 3448  | 1674 | 0 | miR-140*   | 15392 | 5746 | 0 | miR-140*   | 10351 | 5493 | 0 |
| miR-140*   | 3413  | 1653 | 0 | miR-140*   | 16892 | 6185 | 0 | miR-140*   | 11382 | 5630 | 0 |
| miR-140    | 4417  | 1517 | 0 | miR-140    | 19229 | 6155 | 0 | miR-140    | 8747  | 5479 | 0 |
| miR-140    | 4404  | 1534 | 0 | miR-140    | 20661 | 6666 | 0 | miR-140    | 8982  | 5605 | 0 |
| miR-140    | 4433  | 1551 | 0 | miR-140    | 21217 | 6666 | 0 | miR-140    | 9412  | 5746 | 0 |
| miR-141    | 4222  | 1519 | 0 | miR-141    | 17832 | 6144 | 0 | miR-141    | 8280  | 5476 | 0 |
| miR-141    | 4053  | 1549 | 0 | miR-141    | 18132 | 6606 | 0 | miR-141    | 8630  | 5559 | 0 |
| miR-141    | 4355  | 1564 | 0 | miR-141    | 20507 | 6644 | 0 | miR-141    | 8992  | 5736 | 0 |
| miR-142-3p | 4601  | 1528 | 0 | miR-142-3p | 18774 | 6227 | 0 | miR-142-3p | 8457  | 5461 | 0 |
| miR-142-3p | 4229  | 1544 | 0 | miR-142-3p | 19212 | 6668 | 0 | miR-142-3p | 8373  | 5559 | 0 |
| miR-142-3p | 4481  | 1547 | 0 | miR-142-3p | 20165 | 6737 | 0 | miR-142-3p | 8826  | 5734 | 0 |
| miR-142-5p | 3110  | 1535 | 0 | miR-142-5p | 13759 | 5964 | 0 | miR-142-5p | 9382  | 5496 | 0 |
| miR-142-5p | 3141  | 1667 | 0 | miR-142-5p | 11865 | 5791 | 0 | miR-142-5p | 9463  | 5522 | 0 |
| miR-142-5p | 3530  | 1653 | 0 | miR-142-5p | 14277 | 6233 | 0 | miR-142-5p | 10313 | 5656 | 0 |
| miR-143    | 5962  | 2613 | 0 | miR-143    | 9821  | 6568 | 0 | miR-143    | 13829 | 5673 | 0 |

|           |       |      |   |           |       |      |   |           |       |      |   |
|-----------|-------|------|---|-----------|-------|------|---|-----------|-------|------|---|
| miR-143   | 6395  | 2554 | 0 | miR-143   | 9099  | 6299 | 0 | miR-143   | 12790 | 5428 | 0 |
| miR-143   | 5994  | 2573 | 0 | miR-143   | 9896  | 6691 | 0 | miR-143   | 13925 | 5557 | 0 |
| miR-144   | 19494 | 2208 | 0 | miR-144   | 28986 | 7485 | 0 | miR-144   | 27452 | 6709 | 0 |
| miR-144   | 23302 | 2230 | 0 | miR-144   | 28352 | 7234 | 0 | miR-144   | 26114 | 6406 | 0 |
| miR-144   | 22381 | 2181 | 0 | miR-144   | 28353 | 7441 | 0 | miR-144   | 26850 | 6531 | 0 |
| miR-145   | 9849  | 2625 | 0 | miR-145   | 12789 | 6715 | 0 | miR-145   | 22904 | 5775 | 0 |
| miR-145   | 10991 | 2587 | 0 | miR-145   | 12478 | 6346 | 0 | miR-145   | 20303 | 5479 | 0 |
| miR-145   | 9596  | 2581 | 0 | miR-145   | 13955 | 6821 | 0 | miR-145   | 23646 | 5615 | 0 |
| miR-146   | 7915  | 2170 | 0 | miR-146   | 12316 | 7385 | 0 | miR-146   | 26784 | 6692 | 0 |
| miR-146   | 7918  | 2218 | 0 | miR-146   | 12274 | 7235 | 0 | miR-146   | 24874 | 6398 | 0 |
| miR-146   | 7733  | 2169 | 0 | miR-146   | 11782 | 7547 | 0 | miR-146   | 27498 | 6543 | 0 |
| miR-147   | 6854  | 2589 | 0 | miR-147   | 10271 | 6784 | 0 | miR-147   | 15065 | 5749 | 0 |
| miR-147   | 7527  | 2590 | 0 | miR-147   | 9184  | 6299 | 0 | miR-147   | 11976 | 5538 | 0 |
| miR-147   | 6953  | 2575 | 0 | miR-147   | 10346 | 6878 | 0 | miR-147   | 15513 | 5633 | 0 |
| miR-148a  | 8206  | 2155 | 0 | miR-148a  | 12258 | 7340 | 0 | miR-148a  | 28051 | 6706 | 0 |
| miR-148a  | 8208  | 2233 | 0 | miR-148a  | 11474 | 7235 | 0 | miR-148a  | 24958 | 6367 | 0 |
| miR-148a  | 7954  | 2169 | 0 | miR-148a  | 12730 | 7591 | 0 | miR-148a  | 28517 | 6521 | 0 |
| miR-149   | 10234 | 2577 | 0 | miR-149   | 11212 | 6880 | 0 | miR-149   | 24794 | 5839 | 0 |
| miR-149   | 11613 | 2590 | 0 | miR-149   | 10058 | 5828 | 0 | miR-149   | 20533 | 5537 | 0 |
| miR-149   | 10405 | 2569 | 0 | miR-149   | 11471 | 6921 | 0 | miR-149   | 22253 | 5666 | 0 |
| miR-150   | 2957  | 2171 | 0 | miR-150   | 8176  | 7254 | 0 | miR-150   | 9287  | 6686 | 0 |
| miR-150   | 3002  | 2247 | 0 | miR-150   | 8177  | 7183 | 0 | miR-150   | 8869  | 6459 | 0 |
| miR-150   | 3003  | 2208 | 0 | miR-150   | 8711  | 7505 | 0 | miR-150   | 8916  | 6552 | 0 |
| miR-151   | 4129  | 1544 | 0 | miR-151   | 17713 | 6038 | 0 | miR-151   | 10880 | 5529 | 0 |
| miR-151   | 4396  | 1704 | 0 | miR-151   | 17088 | 5772 | 0 | miR-151   | 10421 | 5508 | 0 |
| miR-151   | 4604  | 1637 | 0 | miR-151   | 18795 | 6302 | 0 | miR-151   | 11908 | 5650 | 0 |
| miR-152   | 4243  | 1535 | 0 | miR-152   | 21761 | 6279 | 0 | miR-152   | 8990  | 5454 | 0 |
| miR-152   | 4319  | 1549 | 0 | miR-152   | 22321 | 6651 | 0 | miR-152   | 9170  | 5563 | 0 |
| miR-152   | 4108  | 1543 | 0 | miR-152   | 23920 | 6790 | 0 | miR-152   | 9364  | 5692 | 0 |
| miR-153   | 3295  | 1551 | 0 | miR-153   | 16791 | 6199 | 0 | miR-153   | 10161 | 5620 | 0 |
| miR-153   | 3308  | 1780 | 0 | miR-153   | 14016 | 5843 | 0 | miR-153   | 9735  | 5591 | 0 |
| miR-153   | 3387  | 1662 | 0 | miR-153   | 17486 | 6475 | 0 | miR-153   | 10782 | 5742 | 0 |
| miR-154   | 4826  | 1549 | 0 | miR-154   | 18926 | 6302 | 0 | miR-154   | 8270  | 5476 | 0 |
| miR-154   | 4546  | 1552 | 0 | miR-154   | 19590 | 6730 | 0 | miR-154   | 8690  | 5520 | 0 |
| miR-154   | 4687  | 1557 | 0 | miR-154   | 20611 | 6813 | 0 | miR-154   | 8743  | 5652 | 0 |
| miR-155   | 3399  | 1569 | 0 | miR-155   | 14715 | 6461 | 0 | miR-155   | 9363  | 5720 | 0 |
| miR-155   | 3557  | 1786 | 0 | miR-155   | 11260 | 6058 | 0 | miR-155   | 8650  | 5733 | 0 |
| miR-155   | 3487  | 1670 | 0 | miR-155   | 15345 | 6677 | 0 | miR-155   | 9871  | 5847 | 0 |
| miR-15a   | 3003  | 2359 | 0 | miR-15a   | 6974  | 6414 | 0 | miR-15a   | 6869  | 5880 | 0 |
| miR-15a   | 3123  | 2280 | 0 | miR-15a   | 7989  | 6910 | 0 | miR-15a   | 8064  | 6407 | 0 |
| miR-15a   | 3063  | 2368 | 0 | miR-15a   | 7054  | 6431 | 0 | miR-15a   | 6829  | 5880 | 0 |
| miR-15b   | 6309  | 2138 | 0 | miR-15b   | 19214 | 8099 | 0 | miR-15b   | 24419 | 7380 | 0 |
| miR-15b   | 5907  | 2062 | 0 | miR-15b   | 22827 | 7875 | 0 | miR-15b   | 23465 | 7631 | 0 |
| miR-15b   | 6041  | 2070 | 0 | miR-15b   | 19153 | 8167 | 0 | miR-15b   | 24506 | 7414 | 0 |
| miR-16    | 4883  | 2329 | 0 | miR-16    | 11097 | 6268 | 0 | miR-16    | 12386 | 5964 | 0 |
| miR-16    | 4972  | 2268 | 0 | miR-16    | 13350 | 6765 | 0 | miR-16    | 15220 | 6409 | 0 |
| miR-16    | 5107  | 2370 | 0 | miR-16    | 11405 | 6492 | 0 | miR-16    | 12706 | 5939 | 0 |
| miR-17-3p | 9538  | 2320 | 0 | miR-17-3p | 32994 | 7936 | 0 | miR-17-3p | 35408 | 7397 | 0 |
| miR-17-3p | 9393  | 2038 | 0 | miR-17-3p | 36032 | 7522 | 0 | miR-17-3p | 34786 | 7506 | 0 |

|           |      |      |     |           |       |      |     |           |       |      |     |
|-----------|------|------|-----|-----------|-------|------|-----|-----------|-------|------|-----|
| miR-17-3p | 8882 | 2052 | 0   | miR-17-3p | 31632 | 8044 | 0   | miR-17-3p | 35921 | 7358 | 0   |
| miR-18    | 2937 | 2327 | 0   | miR-18    | 6633  | 6067 | 0   | miR-18    | 6919  | 6026 | 0   |
| miR-18    | 2951 | 2261 | 0   | miR-18    | 7430  | 6670 | 0   | miR-18    | 7822  | 6424 | 0   |
| miR-18    | 3027 | 2373 | 0   | miR-18    | 7245  | 6552 | 0   | miR-18    | 7058  | 5998 | 0   |
| miR-181a  | 5916 | 1550 | 0   | miR-181a  | 22381 | 6304 | 0   | miR-181a  | 12369 | 5475 | 0   |
| miR-181a  | 8347 | 1564 | 0   | miR-181a  | 27510 | 6913 | 0   | miR-181a  | 13940 | 5527 | 0   |
| miR-181a  | 5997 | 1569 | 0   | miR-181a  | 25466 | 6828 | 0   | miR-181a  | 13164 | 5593 | 0   |
| miR-182   | 3591 | 1578 | 0   | miR-182   | 14501 | 6415 | 0   | miR-182   | 9368  | 5721 | 0   |
| miR-182   | 3810 | 1820 | 0   | miR-182   | 10567 | 6056 | 0   | miR-182   | 8299  | 5739 | 0   |
| miR-182   | 3787 | 1656 | 0   | miR-182   | 14546 | 6740 | 0   | miR-182   | 10034 | 5824 | 0   |
| miR-183   | 4468 | 1569 | 0   | miR-183   | 18585 | 6331 | 0   | miR-183   | 8507  | 5479 | 0   |
| miR-183   | 4259 | 1590 | 0   | miR-183   | 20255 | 6990 | 0   | miR-183   | 8848  | 5535 | 0   |
| miR-183   | 4334 | 1608 | 0   | miR-183   | 20590 | 6830 | 0   | miR-183   | 8908  | 5662 | 0   |
| miR-184   | 5618 | 2628 | 0   | miR-184   | 10146 | 6938 | 0   | miR-184   | 12605 | 5885 | 0   |
| miR-184   | 6035 | 2607 | 0   | miR-184   | 8340  | 5829 | 0   | miR-184   | 11364 | 5540 | 0   |
| miR-184   | 5458 | 2594 | 0   | miR-184   | 10390 | 6995 | 0   | miR-184   | 13041 | 5790 | 0   |
| miR-185   | 7460 | 2196 | 0   | miR-185   | 13479 | 7202 | 0   | miR-185   | 27018 | 6760 | 0   |
| miR-185   | 7122 | 2257 | 0   | miR-185   | 11867 | 7177 | 0   | miR-185   | 17311 | 6397 | 0   |
| miR-185   | 7521 | 2237 | 0   | miR-185   | 13225 | 7394 | 0   | miR-185   | 27129 | 6587 | 0   |
| miR-186   | 7419 | 2589 | 0   | miR-186   | 10117 | 6831 | 0   | miR-186   | 16058 | 5762 | 0   |
| miR-186   | 7817 | 2555 | 0   | miR-186   | 8567  | 6044 | 0   | miR-186   | 13623 | 5469 | 0   |
| miR-186   | 7389 | 2564 | 0   | miR-186   | 10211 | 6927 | 0   | miR-186   | 16849 | 5655 | 0   |
| miR-187   | 7910 | 2208 | 0   | miR-187   | 13508 | 7375 | 0   | miR-187   | 27839 | 6832 | 0   |
| miR-187   | 8790 | 2325 | 0   | miR-187   | 11579 | 7214 | 0   | miR-187   | 22865 | 6426 | 0   |
| miR-187   | 7811 | 2249 | 0   | miR-187   | 13573 | 7389 | 0   | miR-187   | 27927 | 6693 | 0   |
| miR-188   | 8431 | 2562 | 0   | miR-188   | 11277 | 6849 | 0   | miR-188   | 18328 | 5792 | 0   |
| miR-188   | 8737 | 2529 | 0   | miR-188   | 9027  | 5830 | 0   | miR-188   | 15438 | 5429 | 0   |
| miR-188   | 8745 | 2561 | 0   | miR-188   | 11264 | 6902 | 0   | miR-188   | 18209 | 5547 | 0   |
| miR-189   | 8238 | 2181 | 0   | miR-189   | 13666 | 7318 | 0   | miR-189   | 31572 | 6867 | 0   |
| miR-189   | 8263 | 2313 | 0   | miR-189   | 11350 | 7160 | 0   | miR-189   | 24082 | 6389 | 0   |
| miR-189   | 8268 | 2228 | 0   | miR-189   | 13471 | 7347 | 0   | miR-189   | 31900 | 6730 | 0   |
| miR-19    | 0    | 0    | -50 | miR-19    | 10870 | 7841 | 0   | miR-19    | 10549 | 7427 | 0   |
| miR-19    | 0    | 0    | -50 | miR-19    | 10819 | 7443 | 0   | miR-19    | 10466 | 7558 | 0   |
| miR-19    | 0    | 0    | -50 | miR-19    | 10694 | 7883 | 0   | miR-19    | 10692 | 7476 | 0   |
| miR-190   | 5788 | 2585 | 0   | miR-190   | 9330  | 6887 | 0   | miR-190   | 13424 | 5847 | 0   |
| miR-190   | 5163 | 2511 | 0   | miR-190   | 7139  | 5660 | 0   | miR-190   | 10667 | 5396 | 0   |
| miR-190   | 5686 | 2607 | 0   | miR-190   | 9487  | 6934 | 0   | miR-190   | 13807 | 5641 | 0   |
| miR-191   | 7602 | 2200 | 0   | miR-191   | 15820 | 7408 | 0   | miR-191   | 33160 | 6986 | 0   |
| miR-191   | 7535 | 2360 | 0   | miR-191   | 12830 | 7097 | 0   | miR-191   | 24598 | 6454 | 0   |
| miR-191   | 7626 | 2204 | 0   | miR-191   | 15991 | 7378 | 0   | miR-191   | 32847 | 6800 | 0   |
| miR-192   | 3947 | 1566 | 0   | miR-192   | 19153 | 6347 | 0   | miR-192   | 11274 | 5679 | 0   |
| miR-192   | 4145 | 1854 | 0   | miR-192   | 14299 | 5885 | 0   | miR-192   | 10139 | 5674 | 0   |
| miR-192   | 4086 | 1654 | 0   | miR-192   | 19066 | 6673 | 0   | miR-192   | 12123 | 5759 | 0   |
| miR-193   | 5210 | 1612 | 0   | miR-193   | 21271 | 6369 | 0   | miR-193   | 9722  | 5504 | 0   |
| miR-193   | 5347 | 1604 | 0   | miR-193   | 23712 | 7060 | 0   | miR-193   | 10171 | 5589 | 0   |
| miR-193   | 5071 | 1614 | 0   | miR-193   | 23648 | 6888 | 0   | miR-193   | 10026 | 5711 | 0   |
| miR-194   | 3276 | 1580 | 0   | miR-194   | 0     | 0    | -50 | miR-194   | 0     | 0    | -50 |
| miR-194   | 3485 | 1876 | 0   | miR-194   | 0     | 0    | -50 | miR-194   | 0     | 0    | -50 |
| miR-194   | 3397 | 1677 | 0   | miR-194   | 0     | 0    | -50 | miR-194   | 0     | 0    | -50 |

|          |       |      |   |          |       |      |     |          |       |      |   |
|----------|-------|------|---|----------|-------|------|-----|----------|-------|------|---|
| miR-195  | 3400  | 1676 | 0 | miR-195  | 20201 | 6562 | 0   | miR-195  | 9031  | 5591 | 0 |
| miR-195  | 3421  | 1642 | 0 | miR-195  | 23138 | 7368 | 0   | miR-195  | 9636  | 5735 | 0 |
| miR-195  | 3222  | 1645 | 0 | miR-195  | 21415 | 7053 | 0   | miR-195  | 9529  | 5811 | 0 |
| miR-196a | 3618  | 1580 | 0 | miR-196a | 0     | 0    | -50 | miR-196a | 9774  | 5962 | 0 |
| miR-196a | 4074  | 1906 | 0 | miR-196a | 0     | 0    | -50 | miR-196a | 8397  | 5828 | 0 |
| miR-196a | 3615  | 1655 | 0 | miR-196a | 0     | 0    | -50 | miR-196a | 10199 | 5975 | 0 |
| miR-197  | 3966  | 1703 | 0 | miR-197  | 20709 | 6720 | 0   | miR-197  | 8009  | 5742 | 0 |
| miR-197  | 4296  | 1664 | 0 | miR-197  | 25026 | 7776 | 0   | miR-197  | 9024  | 5901 | 0 |
| miR-197  | 4091  | 1685 | 0 | miR-197  | 22917 | 7242 | 0   | miR-197  | 9176  | 5922 | 0 |
| miR-198  | 3970  | 1584 | 0 | miR-198  | 0     | 0    | -50 | miR-198  | 11426 | 5933 | 0 |
| miR-198  | 4717  | 1916 | 0 | miR-198  | 0     | 0    | -50 | miR-198  | 9499  | 5859 | 0 |
| miR-198  | 4035  | 1655 | 0 | miR-198  | 0     | 0    | -50 | miR-198  | 11910 | 6005 | 0 |
| miR-199* | 3396  | 2642 | 0 | miR-199* | 0     | 0    | -50 | miR-199* | 4745  | 3600 | 0 |
| miR-199* | 3474  | 2573 | 0 | miR-199* | 0     | 0    | -50 | miR-199* | 5631  | 3798 | 0 |
| miR-199* | 3483  | 2669 | 0 | miR-199* | 0     | 0    | -50 | miR-199* | 4675  | 3537 | 0 |
| miR-199  | 8408  | 1671 | 0 | miR-199  | 23636 | 6610 | 0   | miR-199  | 11227 | 5685 | 0 |
| miR-199  | 8857  | 1679 | 0 | miR-199  | 26225 | 7755 | 0   | miR-199  | 11903 | 5916 | 0 |
| miR-199  | 8599  | 1654 | 0 | miR-199  | 27911 | 6954 | 0   | miR-199  | 11981 | 5886 | 0 |
| miR-2a   | 19039 | 2434 | 0 | miR-2a   | 30695 | 6104 | 0   | miR-2a   | 21597 | 5782 | 0 |
| miR-2a   | 18975 | 2218 | 0 | miR-2a   | 32225 | 7128 | 0   | miR-2a   | 23236 | 6421 | 0 |
| miR-2a   | 19060 | 2422 | 0 | miR-2a   | 30636 | 6037 | 0   | miR-2a   | 21813 | 5831 | 0 |
| miR-20a  | 7373  | 2336 | 0 | miR-20a  | 9950  | 6006 | 0   | miR-20a  | 12516 | 6104 | 0 |
| miR-20a  | 8052  | 2301 | 0 | miR-20a  | 11785 | 6654 | 0   | miR-20a  | 15101 | 6412 | 0 |
| miR-20a  | 7567  | 2356 | 0 | miR-20a  | 11191 | 6378 | 0   | miR-20a  | 12098 | 6037 | 0 |
| miR-200b | 5122  | 2446 | 0 | miR-200b | 8651  | 5236 | 0   | miR-200b | 9320  | 3855 | 0 |
| miR-200b | 5597  | 2918 | 0 | miR-200b | 15518 | 6612 | 0   | miR-200b | 8911  | 3352 | 0 |
| miR-200b | 5574  | 2561 | 0 | miR-200b | 9170  | 5776 | 0   | miR-200b | 9918  | 3691 | 0 |
| miR-200c | 4817  | 2278 | 0 | miR-200c | 15464 | 7518 | 0   | miR-200c | 23296 | 7316 | 0 |
| miR-200c | 4844  | 2343 | 0 | miR-200c | 13541 | 6914 | 0   | miR-200c | 15701 | 6234 | 0 |
| miR-200c | 4859  | 2305 | 0 | miR-200c | 14929 | 7394 | 0   | miR-200c | 23095 | 7069 | 0 |
| miR-201  | 25875 | 2694 | 0 | miR-201  | 27356 | 6276 | 0   | miR-201  | 18832 | 3695 | 0 |
| miR-201  | 25872 | 2637 | 0 | miR-201  | 27544 | 6668 | 0   | miR-201  | 18537 | 3859 | 0 |
| miR-201  | 26099 | 2754 | 0 | miR-201  | 27143 | 6143 | 0   | miR-201  | 18654 | 3566 | 0 |
| miR-202  | 25175 | 2483 | 0 | miR-202  | 27555 | 5620 | 0   | miR-202  | 26918 | 3889 | 0 |
| miR-202  | 26380 | 2975 | 0 | miR-202  | 26441 | 6581 | 0   | miR-202  | 27883 | 3416 | 0 |
| miR-202  | 24897 | 2581 | 0 | miR-202  | 28106 | 5442 | 0   | miR-202  | 27721 | 3734 | 0 |
| miR-203  | 26315 | 2747 | 0 | miR-203  | 38867 | 6323 | 0   | miR-203  | 29986 | 3712 | 0 |
| miR-203  | 26830 | 2664 | 0 | miR-203  | 41035 | 6728 | 0   | miR-203  | 31918 | 3852 | 0 |
| miR-203  | 26259 | 2771 | 0 | miR-203  | 39876 | 6226 | 0   | miR-203  | 29420 | 3580 | 0 |
| miR-204  | 7211  | 2523 | 0 | miR-204  | 8328  | 5602 | 0   | miR-204  | 7394  | 3930 | 0 |
| miR-204  | 7057  | 3027 | 0 | miR-204  | 13175 | 6591 | 0   | miR-204  | 7407  | 3499 | 0 |
| miR-204  | 6720  | 2641 | 0 | miR-204  | 9242  | 5417 | 0   | miR-204  | 8190  | 3756 | 0 |
| miR-205  | 20819 | 2748 | 0 | miR-205  | 23695 | 6350 | 0   | miR-205  | 24473 | 3758 | 0 |
| miR-205  | 23191 | 2680 | 0 | miR-205  | 27134 | 6695 | 0   | miR-205  | 27089 | 3842 | 0 |
| miR-205  | 22057 | 2778 | 0 | miR-205  | 23086 | 6285 | 0   | miR-205  | 23596 | 3652 | 0 |
| miR-206  | 6390  | 2561 | 0 | miR-206  | 8977  | 5919 | 0   | miR-206  | 9448  | 4001 | 0 |
| miR-206  | 8346  | 3171 | 0 | miR-206  | 9617  | 6703 | 0   | miR-206  | 8255  | 3692 | 0 |
| miR-206  | 6725  | 2728 | 0 | miR-206  | 7965  | 5639 | 0   | miR-206  | 8723  | 3834 | 0 |
| miR-207  | 9709  | 2299 | 0 | miR-207  | 0     | 0    | -50 | miR-207  | 22526 | 6659 | 0 |

|           |       |      |   |           |       |      |     |           |       |      |   |
|-----------|-------|------|---|-----------|-------|------|-----|-----------|-------|------|---|
| miR-207   | 9481  | 2088 | 0 | miR-207   | 0     | 0    | -50 | miR-207   | 32629 | 7695 | 0 |
| miR-207   | 8478  | 2285 | 0 | miR-207   | 0     | 0    | -50 | miR-207   | 21852 | 6640 | 0 |
| miR-208   | 3989  | 2083 | 0 | miR-208   | 18568 | 8035 | 0   | miR-208   | 18817 | 7759 | 0 |
| miR-208   | 3622  | 1948 | 0 | miR-208   | 11242 | 6773 | 0   | miR-208   | 18235 | 7663 | 0 |
| miR-208   | 4245  | 2097 | 0 | miR-208   | 20003 | 8048 | 0   | miR-208   | 19156 | 7809 | 0 |
| miR-21    | 3408  | 2261 | 0 | miR-21    | 11204 | 7729 | 0   | miR-21    | 10683 | 7441 | 0 |
| miR-21    | 2872  | 1977 | 0 | miR-21    | 11427 | 7525 | 0   | miR-21    | 10605 | 7547 | 0 |
| miR-21    | 2854  | 2010 | 0 | miR-21    | 11042 | 7765 | 0   | miR-21    | 10932 | 7499 | 0 |
| miR-210   | 7836  | 2332 | 0 | miR-210   | 12399 | 7246 | 0   | miR-210   | 17516 | 6674 | 0 |
| miR-210   | 7958  | 2132 | 0 | miR-210   | 17702 | 8135 | 0   | miR-210   | 24423 | 7576 | 0 |
| miR-210   | 7409  | 2305 | 0 | miR-210   | 13882 | 6898 | 0   | miR-210   | 17809 | 6724 | 0 |
| miR-211   | 7478  | 2090 | 0 | miR-211   | 28559 | 8039 | 0   | miR-211   | 27364 | 7816 | 0 |
| miR-211   | 6736  | 1967 | 0 | miR-211   | 14546 | 6857 | 0   | miR-211   | 25279 | 7610 | 0 |
| miR-211   | 7620  | 2099 | 0 | miR-211   | 30794 | 8274 | 0   | miR-211   | 28725 | 7861 | 0 |
| miR-212   | 2793  | 2313 | 0 | miR-212   | 0     | 0    | -50 | miR-212   | 8641  | 6747 | 0 |
| miR-212   | 3129  | 2177 | 0 | miR-212   | 0     | 0    | -50 | miR-212   | 10811 | 7654 | 0 |
| miR-212   | 2939  | 2274 | 0 | miR-212   | 0     | 0    | -50 | miR-212   | 8854  | 6826 | 0 |
| miR-181a* | 6413  | 2081 | 0 | miR-181a* | 25007 | 8090 | 0   | miR-181a* | 24170 | 7810 | 0 |
| miR-181a* | 5781  | 1980 | 0 | miR-181a* | 15499 | 6875 | 0   | miR-181a* | 23255 | 7609 | 0 |
| miR-181a* | 6237  | 2065 | 0 | miR-181a* | 28936 | 8353 | 0   | miR-181a* | 24847 | 7848 | 0 |
| miR-214   | 6214  | 2352 | 0 | miR-214   | 14016 | 7361 | 0   | miR-214   | 16693 | 6782 | 0 |
| miR-214   | 6843  | 2200 | 0 | miR-214   | 18427 | 8392 | 0   | miR-214   | 21350 | 7671 | 0 |
| miR-214   | 6093  | 2299 | 0 | miR-214   | 13953 | 6683 | 0   | miR-214   | 16967 | 6856 | 0 |
| miR-215   | 4559  | 2055 | 0 | miR-215   | 19970 | 7974 | 0   | miR-215   | 19212 | 7788 | 0 |
| miR-215   | 4010  | 2017 | 0 | miR-215   | 12280 | 6942 | 0   | miR-215   | 17962 | 7604 | 0 |
| miR-215   | 4462  | 2060 | 0 | miR-215   | 20962 | 8246 | 0   | miR-215   | 19458 | 7798 | 0 |
| miR-216   | 7336  | 2752 | 0 | miR-216   | 8685  | 6389 | 0   | miR-216   | 12187 | 3841 | 0 |
| miR-216   | 7872  | 2741 | 0 | miR-216   | 9914  | 6654 | 0   | miR-216   | 13120 | 3878 | 0 |
| miR-216   | 7755  | 2788 | 0 | miR-216   | 9836  | 6366 | 0   | miR-216   | 11217 | 3658 | 0 |
| miR-217   | 6387  | 2655 | 0 | miR-217   | 9818  | 6300 | 0   | miR-217   | 12243 | 4065 | 0 |
| miR-217   | 8026  | 3231 | 0 | miR-217   | 10436 | 6725 | 0   | miR-217   | 10435 | 3907 | 0 |
| miR-217   | 6761  | 2876 | 0 | miR-217   | 9660  | 6025 | 0   | miR-217   | 10173 | 3908 | 0 |
| miR-218   | 7760  | 2742 | 0 | miR-218   | 8223  | 6258 | 0   | miR-218   | 11929 | 3752 | 0 |
| miR-218   | 7947  | 2746 | 0 | miR-218   | 8319  | 6620 | 0   | miR-218   | 13615 | 3868 | 0 |
| miR-218   | 8024  | 2764 | 0 | miR-218   | 8179  | 6264 | 0   | miR-218   | 11475 | 3636 | 0 |
| miR-219   | 6832  | 2698 | 0 | miR-219   | 9939  | 6423 | 0   | miR-219   | 11908 | 4124 | 0 |
| miR-219   | 9128  | 3358 | 0 | miR-219   | 9708  | 6786 | 0   | miR-219   | 10949 | 3995 | 0 |
| miR-219   | 7536  | 2968 | 0 | miR-219   | 10198 | 6452 | 0   | miR-219   | 9963  | 3963 | 0 |
| miR-22b   | 3484  | 2624 | 0 | miR-22b   | 0     | 0    | -50 | miR-22b   | 4783  | 3518 | 0 |
| miR-22b   | 3658  | 2706 | 0 | miR-22b   | 0     | 0    | -50 | miR-22b   | 4624  | 3444 | 0 |
| miR-22b   | 3464  | 2611 | 0 | miR-22b   | 0     | 0    | -50 | miR-22b   | 4521  | 3501 | 0 |
| miR-220   | 3668  | 2739 | 0 | miR-220   | 0     | 0    | -50 | miR-220   | 5276  | 3722 | 0 |
| miR-220   | 3659  | 2731 | 0 | miR-220   | 0     | 0    | -50 | miR-220   | 5632  | 3778 | 0 |
| miR-220   | 3740  | 2747 | 0 | miR-220   | 0     | 0    | -50 | miR-220   | 5135  | 3604 | 0 |
| miR-221   | 9975  | 2684 | 0 | miR-221   | 12141 | 6541 | 0   | miR-221   | 13381 | 4138 | 0 |
| miR-221   | 12592 | 3213 | 0 | miR-221   | 13552 | 6790 | 0   | miR-221   | 11933 | 3939 | 0 |
| miR-221   | 11252 | 2952 | 0 | miR-221   | 12009 | 6486 | 0   | miR-221   | 10610 | 3942 | 0 |
| miR-222   | 6630  | 2745 | 0 | miR-222   | 8861  | 6188 | 0   | miR-222   | 9151  | 3735 | 0 |
| miR-222   | 6982  | 2735 | 0 | miR-222   | 9499  | 6589 | 0   | miR-222   | 10300 | 3726 | 0 |

|              |       |      |   |              |       |      |   |              |       |      |   |
|--------------|-------|------|---|--------------|-------|------|---|--------------|-------|------|---|
| miR-222      | 6911  | 2742 | 0 | miR-222      | 8866  | 6139 | 0 | miR-222      | 9071  | 3605 | 0 |
| miR-223      | 9245  | 2655 | 0 | miR-223      | 9646  | 6506 | 0 | miR-223      | 10583 | 4160 | 0 |
| miR-223      | 9414  | 3121 | 0 | miR-223      | 9448  | 6820 | 0 | miR-223      | 8995  | 3961 | 0 |
| miR-223      | 9509  | 2927 | 0 | miR-223      | 9580  | 6498 | 0 | miR-223      | 9706  | 3959 | 0 |
| miR-224      | 5751  | 2343 | 0 | miR-224      | 12159 | 7064 | 0 | miR-224      | 16172 | 6894 | 0 |
| miR-224      | 6023  | 2190 | 0 | miR-224      | 18467 | 8449 | 0 | miR-224      | 20020 | 7608 | 0 |
| miR-224      | 5655  | 2296 | 0 | miR-224      | 12220 | 7149 | 0 | miR-224      | 16253 | 6904 | 0 |
| miR-26ashort | 5897  | 2287 | 0 | miR-26ashort | 13324 | 7615 | 0 | miR-26ashort | 10452 | 7325 | 0 |
| miR-26ashort | 5831  | 2336 | 0 | miR-26ashort | 13459 | 7690 | 0 | miR-26ashort | 10527 | 7255 | 0 |
| miR-26ashort | 6417  | 2328 | 0 | miR-26ashort | 13419 | 7576 | 0 | miR-26ashort | 9296  | 6987 | 0 |
| miR-23a      | 3024  | 2299 | 0 | miR-23a      | 7291  | 6517 | 0 | miR-23a      | 5025  | 3661 | 0 |
| miR-23a      | 3320  | 2348 | 0 | miR-23a      | 7074  | 6492 | 0 | miR-23a      | 4748  | 3541 | 0 |
| miR-23a      | 3182  | 2324 | 0 | miR-23a      | 7130  | 6478 | 0 | miR-23a      | 4617  | 3496 | 0 |
| miR-23b      | 3345  | 2641 | 0 | miR-23b      | 6416  | 5894 | 0 | miR-23b      | 4498  | 3493 | 0 |
| miR-23b      | 3572  | 2694 | 0 | miR-23b      | 6413  | 5631 | 0 | miR-23b      | 4378  | 3428 | 0 |
| miR-23b      | 3462  | 2624 | 0 | miR-23b      | 6339  | 5770 | 0 | miR-23b      | 4500  | 3476 | 0 |
| miR-24       | 3036  | 2274 | 0 | miR-24       | 7195  | 6608 | 0 | miR-24       | 4963  | 3702 | 0 |
| miR-24       | 3245  | 2336 | 0 | miR-24       | 7313  | 6637 | 0 | miR-24       | 4846  | 3566 | 0 |
| miR-24       | 3038  | 2349 | 0 | miR-24       | 7110  | 6503 | 0 | miR-24       | 4568  | 3450 | 0 |
| miR-25       | 9325  | 2675 | 0 | miR-25       | 9406  | 5813 | 0 | miR-25       | 13075 | 3467 | 0 |
| miR-25       | 10341 | 2685 | 0 | miR-25       | 9364  | 5483 | 0 | miR-25       | 14847 | 3427 | 0 |
| miR-25       | 10710 | 2631 | 0 | miR-25       | 8781  | 5789 | 0 | miR-25       | 13575 | 3446 | 0 |
| miR-263b     | 6307  | 2050 | 0 | miR-263b     | 23698 | 7886 | 0 | miR-263b     | 22284 | 7775 | 0 |
| miR-263b     | 5787  | 2013 | 0 | miR-263b     | 15780 | 7059 | 0 | miR-263b     | 20656 | 7744 | 0 |
| miR-263b     | 6288  | 2069 | 0 | miR-263b     | 24818 | 8185 | 0 | miR-263b     | 24168 | 7843 | 0 |
| miR-26along  | 4841  | 1810 | 0 | miR-26along  | 12108 | 6825 | 0 | miR-26along  | 9346  | 5713 | 0 |
| miR-26along  | 5286  | 1814 | 0 | miR-26along  | 11907 | 7034 | 0 | miR-26along  | 9210  | 5857 | 0 |
| miR-26along  | 4813  | 1843 | 0 | miR-26along  | 11877 | 7004 | 0 | miR-26along  | 9055  | 6009 | 0 |
| miR-26mm2    | 5490  | 2739 | 0 | miR-26mm2    | 10020 | 6977 | 0 | miR-26mm2    | 14955 | 6299 | 0 |
| miR-26mm2    | 5842  | 2666 | 0 | miR-26mm2    | 10855 | 7695 | 0 | miR-26mm2    | 17722 | 6833 | 0 |
| miR-26mm2    | 5643  | 2769 | 0 | miR-26mm2    | 10020 | 7046 | 0 | miR-26mm2    | 15402 | 6167 | 0 |
| miR-26mm6    | 5046  | 2731 | 0 | miR-26mm6    | 10321 | 7309 | 0 | miR-26mm6    | 13812 | 6760 | 0 |
| miR-26mm6    | 4956  | 2779 | 0 | miR-26mm6    | 9901  | 7327 | 0 | miR-26mm6    | 14972 | 6693 | 0 |
| miR-26mm6    | 5051  | 2754 | 0 | miR-26mm6    | 9900  | 7300 | 0 | miR-26mm6    | 14854 | 6692 | 0 |
| miR-275      | 9452  | 2321 | 0 | miR-275      | 18971 | 7089 | 0 | miR-275      | 24216 | 6889 | 0 |
| miR-275      | 9552  | 2210 | 0 | miR-275      | 24733 | 8337 | 0 | miR-275      | 27937 | 7611 | 0 |
| miR-275      | 8756  | 2301 | 0 | miR-275      | 20648 | 7505 | 0 | miR-275      | 23983 | 6933 | 0 |
| miR-276b     | 4878  | 2083 | 0 | miR-276b     | 19540 | 8049 | 0 | miR-276b     | 19016 | 7865 | 0 |
| miR-276b     | 4393  | 1993 | 0 | miR-276b     | 12886 | 7190 | 0 | miR-276b     | 17254 | 7796 | 0 |
| miR-276b     | 4896  | 2087 | 0 | miR-276b     | 21185 | 8457 | 0 | miR-276b     | 19798 | 7922 | 0 |
| miR-277      | 5852  | 2341 | 0 | miR-277      | 11829 | 7223 | 0 | miR-277      | 15280 | 6899 | 0 |
| miR-277      | 6036  | 2214 | 0 | miR-277      | 15751 | 8266 | 0 | miR-277      | 18564 | 7618 | 0 |
| miR-277      | 5478  | 2306 | 0 | miR-277      | 9770  | 7266 | 0 | miR-277      | 15081 | 7045 | 0 |



|             |       |      |   |             |       |      |     |             |       |      |   |
|-------------|-------|------|---|-------------|-------|------|-----|-------------|-------|------|---|
| miR-278     | 5442  | 2086 | 0 | miR-278     | 18145 | 8156 | 0   | miR-278     | 20160 | 7968 | 0 |
| miR-278     | 4711  | 2020 | 0 | miR-278     | 12393 | 7332 | 0   | miR-278     | 18840 | 7789 | 0 |
| miR-278     | 5306  | 2080 | 0 | miR-278     | 19475 | 8544 | 0   | miR-278     | 20300 | 7983 | 0 |
| miR-279     | 5339  | 2357 | 0 | miR-279     | 15494 | 7293 | 0   | miR-279     | 17920 | 6987 | 0 |
| miR-279     | 5616  | 2258 | 0 | miR-279     | 19984 | 8356 | 0   | miR-279     | 19605 | 7540 | 0 |
| miR-279     | 5219  | 2296 | 0 | miR-279     | 15046 | 7137 | 0   | miR-279     | 17910 | 7099 | 0 |
| miR-27a     | 3088  | 2253 | 0 | miR-27a     | 0     | 0    | -50 | miR-27a     | 4910  | 3662 | 0 |
| miR-27a     | 3302  | 2356 | 0 | miR-27a     | 0     | 0    | -50 | miR-27a     | 4721  | 3560 | 0 |
| miR-27a     | 3150  | 2320 | 0 | miR-27a     | 0     | 0    | -50 | miR-27a     | 4589  | 3450 | 0 |
| miR-27b     | 7830  | 2675 | 0 | miR-27b     | 8728  | 5518 | 0   | miR-27b     | 10276 | 3490 | 0 |
| miR-27b     | 8440  | 2692 | 0 | miR-27b     | 8465  | 5390 | 0   | miR-27b     | 10171 | 3464 | 0 |
| miR-27b     | 8569  | 2622 | 0 | miR-27b     | 9075  | 5733 | 0   | miR-27b     | 9847  | 3460 | 0 |
| miR-28      | 2951  | 2244 | 0 | miR-28      | 0     | 0    | -50 | miR-28      | 4836  | 3631 | 0 |
| miR-28      | 3102  | 2344 | 0 | miR-28      | 0     | 0    | -50 | miR-28      | 4729  | 3513 | 0 |
| miR-28      | 3169  | 2319 | 0 | miR-28      | 0     | 0    | -50 | miR-28      | 4567  | 3433 | 0 |
| miR-281     | 5171  | 2050 | 0 | miR-281     | 18459 | 8106 | 0   | miR-281     | 18613 | 7984 | 0 |
| miR-281     | 4388  | 2016 | 0 | miR-281     | 13298 | 7415 | 0   | miR-281     | 17494 | 7850 | 0 |
| miR-281     | 4954  | 2049 | 0 | miR-281     | 19892 | 8478 | 0   | miR-281     | 19170 | 7964 | 0 |
| miR-283     | 7056  | 2760 | 0 | miR-283     | 7954  | 6265 | 0   | miR-283     | 11918 | 3795 | 0 |
| miR-283     | 7322  | 2766 | 0 | miR-283     | 8605  | 6539 | 0   | miR-283     | 12921 | 3779 | 0 |
| miR-283     | 7136  | 2782 | 0 | miR-283     | 8155  | 6235 | 0   | miR-283     | 11463 | 3640 | 0 |
| miR-285     | 10002 | 2672 | 0 | miR-285     | 11489 | 6533 | 0   | miR-285     | 14011 | 4116 | 0 |
| miR-285     | 11648 | 3078 | 0 | miR-285     | 11788 | 6933 | 0   | miR-285     | 11878 | 3962 | 0 |
| miR-285     | 11613 | 2965 | 0 | miR-285     | 11017 | 6481 | 0   | miR-285     | 12368 | 3946 | 0 |
| miR-286     | 6577  | 2799 | 0 | miR-286     | 8898  | 6384 | 0   | miR-286     | 12640 | 3820 | 0 |
| miR-286     | 6613  | 2784 | 0 | miR-286     | 9386  | 6532 | 0   | miR-286     | 13460 | 3836 | 0 |
| miR-286     | 6798  | 2808 | 0 | miR-286     | 9115  | 6366 | 0   | miR-286     | 12291 | 3676 | 0 |
| miR-290     | 9302  | 2638 | 0 | miR-290     | 10067 | 6443 | 0   | miR-290     | 10889 | 4078 | 0 |
| miR-290     | 10079 | 3002 | 0 | miR-290     | 10846 | 6887 | 0   | miR-290     | 11265 | 3995 | 0 |
| miR-290     | 10746 | 2914 | 0 | miR-290     | 10325 | 6445 | 0   | miR-290     | 10475 | 3947 | 0 |
| miR-291a-3p | 12688 | 2607 | 0 | miR-291a-3p | 11009 | 6371 | 0   | miR-291a-3p | 11405 | 4058 | 0 |
| miR-291a-3p | 15486 | 2904 | 0 | miR-291a-3p | 11642 | 6870 | 0   | miR-291a-3p | 11126 | 3971 | 0 |
| miR-291a-3p | 14494 | 2862 | 0 | miR-291a-3p | 10596 | 6446 | 0   | miR-291a-3p | 9932  | 3878 | 0 |
| miR-291-5p  | 12008 | 2779 | 0 | miR-291-5p  | 9321  | 6348 | 0   | miR-291-5p  | 22127 | 3803 | 0 |
| miR-291-5p  | 12615 | 2784 | 0 | miR-291-5p  | 10274 | 6530 | 0   | miR-291-5p  | 22198 | 3790 | 0 |
| miR-291-5p  | 12086 | 2773 | 0 | miR-291-5p  | 9996  | 6311 | 0   | miR-291-5p  | 20282 | 3677 | 0 |
| miR-292-3p  | 8815  | 2636 | 0 | miR-292-3p  | 9633  | 6466 | 0   | miR-292-3p  | 10088 | 4073 | 0 |
| miR-292-3p  | 11483 | 2866 | 0 | miR-292-3p  | 10151 | 6666 | 0   | miR-292-3p  | 9447  | 4000 | 0 |
| miR-292-3p  | 11895 | 2892 | 0 | miR-292-3p  | 9701  | 6512 | 0   | miR-292-3p  | 9385  | 3870 | 0 |
| miR-292-5p  | 7281  | 2754 | 0 | miR-292-5p  | 7257  | 6396 | 0   | miR-292-5p  | 12487 | 3762 | 0 |
| miR-292-5p  | 7572  | 2794 | 0 | miR-292-5p  | 7985  | 6501 | 0   | miR-292-5p  | 12616 | 3763 | 0 |
| miR-292-5p  | 7149  | 2761 | 0 | miR-292-5p  | 7496  | 6351 | 0   | miR-292-5p  | 11538 | 3673 | 0 |
| miR-293     | 6184  | 2401 | 0 | miR-293     | 10362 | 7607 | 0   | miR-293     | 14552 | 7231 | 0 |

|         |      |      |   |         |       |      |   |         |       |      |   |
|---------|------|------|---|---------|-------|------|---|---------|-------|------|---|
| miR-293 | 5945 | 2347 | 0 | miR-293 | 12903 | 8575 | 0 | miR-293 | 16632 | 7729 | 0 |
| miR-293 | 5614 | 2340 | 0 | miR-293 | 10445 | 7641 | 0 | miR-293 | 15058 | 7369 | 0 |
| miR-294 | 6142 | 2028 | 0 | miR-294 | 18397 | 7791 | 0 | miR-294 | 20609 | 7806 | 0 |
| miR-294 | 5226 | 1989 | 0 | miR-294 | 15094 | 7453 | 0 | miR-294 | 20536 | 7757 | 0 |
| miR-294 | 5642 | 2032 | 0 | miR-294 | 20221 | 8128 | 0 | miR-294 | 20762 | 7916 | 0 |
| miR-295 | 6452 | 2422 | 0 | miR-295 | 12719 | 7918 | 0 | miR-295 | 16316 | 7457 | 0 |
| miR-295 | 6149 | 2385 | 0 | miR-295 | 14941 | 8653 | 0 | miR-295 | 18193 | 7794 | 0 |
| miR-295 | 5687 | 2388 | 0 | miR-295 | 12673 | 7701 | 0 | miR-295 | 16674 | 7526 | 0 |
| miR-296 | 9437 | 2025 | 0 | miR-296 | 33811 | 7597 | 0 | miR-296 | 36447 | 7712 | 0 |
| miR-296 | 8282 | 1976 | 0 | miR-296 | 30061 | 7493 | 0 | miR-296 | 33180 | 7708 | 0 |
| miR-296 | 9100 | 1988 | 0 | miR-296 | 38715 | 7884 | 0 | miR-296 | 34449 | 7857 | 0 |
| miR-297 | 6660 | 2419 | 0 | miR-297 | 13582 | 7884 | 0 | miR-297 | 17555 | 7508 | 0 |
| miR-297 | 6514 | 2391 | 0 | miR-297 | 15570 | 8539 | 0 | miR-297 | 17417 | 7792 | 0 |
| miR-297 | 6375 | 2368 | 0 | miR-297 | 14331 | 7716 | 0 | miR-297 | 17426 | 7676 | 0 |
| miR-298 | 5722 | 2024 | 0 | miR-298 | 18883 | 7788 | 0 | miR-298 | 22961 | 7795 | 0 |
| miR-298 | 5746 | 2024 | 0 | miR-298 | 17749 | 7893 | 0 | miR-298 | 20450 | 7812 | 0 |
| miR-298 | 5636 | 1988 | 0 | miR-298 | 21144 | 8080 | 0 | miR-298 | 21477 | 7908 | 0 |
| miR-299 | 7344 | 2409 | 0 | miR-299 | 15931 | 8161 | 0 | miR-299 | 19391 | 7465 | 0 |
| miR-299 | 7315 | 2430 | 0 | miR-299 | 14741 | 8164 | 0 | miR-299 | 19731 | 7668 | 0 |
| miR-299 | 6929 | 2363 | 0 | miR-299 | 15898 | 7814 | 0 | miR-299 | 19572 | 7672 | 0 |
| miR-29a | 6105 | 2344 | 0 | miR-29a | 11789 | 6202 | 0 | miR-29a | 13532 | 6138 | 0 |
| miR-29a | 6156 | 2313 | 0 | miR-29a | 12955 | 6614 | 0 | miR-29a | 14603 | 6352 | 0 |
| miR-29a | 6059 | 2346 | 0 | miR-29a | 11364 | 6194 | 0 | miR-29a | 13327 | 6088 | 0 |
| miR-29b | 2858 | 2052 | 0 | miR-29b | 10812 | 7654 | 0 | miR-29b | 10573 | 7478 | 0 |
| miR-29b | 2794 | 1967 | 0 | miR-29b | 10904 | 7469 | 0 | miR-29b | 10681 | 7563 | 0 |
| miR-29b | 2770 | 2007 | 0 | miR-29b | 10807 | 7699 | 0 | miR-29b | 10620 | 7485 | 0 |
| miR-29c | 2876 | 2293 | 0 | miR-29c | 6961  | 6307 | 0 | miR-29c | 7139  | 6128 | 0 |
| miR-29c | 2942 | 2304 | 0 | miR-29c | 7252  | 6624 | 0 | miR-29c | 7597  | 6346 | 0 |
| miR-29c | 3012 | 2306 | 0 | miR-29c | 6984  | 6257 | 0 | miR-29c | 7257  | 6118 | 0 |
| miR-3   | 2928 | 2037 | 0 | miR-3   | 10207 | 8062 | 0 | miR-3   | 10453 | 7369 | 0 |
| miR-3   | 2869 | 2023 | 0 | miR-3   | 11848 | 7719 | 0 | miR-3   | 10668 | 7643 | 0 |
| miR-3   | 2780 | 2044 | 0 | miR-3   | 10438 | 8046 | 0 | miR-3   | 10246 | 7395 | 0 |
| miR-300 | 5150 | 2050 | 0 | miR-300 | 20807 | 7979 | 0 | miR-300 | 21674 | 7893 | 0 |
| miR-300 | 5012 | 2076 | 0 | miR-300 | 21457 | 8116 | 0 | miR-300 | 21696 | 7972 | 0 |
| miR-300 | 4816 | 2028 | 0 | miR-300 | 23005 | 8311 | 0 | miR-300 | 22213 | 7922 | 0 |
| miR-301 | 7076 | 2757 | 0 | miR-301 | 32865 | 6460 | 0 | miR-301 | 12651 | 3793 | 0 |
| miR-301 | 7070 | 2796 | 0 | miR-301 | 32093 | 6426 | 0 | miR-301 | 12225 | 3776 | 0 |
| miR-301 | 6689 | 2773 | 0 | miR-301 | 32707 | 6418 | 0 | miR-301 | 11680 | 3693 | 0 |
| miR-302 | 9385 | 2727 | 0 | miR-302 | 9769  | 6660 | 0 | miR-302 | 10241 | 4056 | 0 |
| miR-302 | 9879 | 2836 | 0 | miR-302 | 9327  | 6520 | 0 | miR-302 | 9646  | 4015 | 0 |
| miR-302 | 9972 | 2981 | 0 | miR-302 | 9923  | 6676 | 0 | miR-302 | 9428  | 3870 | 0 |
| miR-303 | 7188 | 2754 | 0 | miR-303 | 7955  | 6476 | 0 | miR-303 | 12389 | 3818 | 0 |
| miR-303 | 7248 | 2798 | 0 | miR-303 | 8620  | 6390 | 0 | miR-303 | 11147 | 3782 | 0 |
| miR-303 | 7167 | 2757 | 0 | miR-303 | 8047  | 6475 | 0 | miR-303 | 11310 | 3712 | 0 |
| miR-304 | 7818 | 2805 | 0 | miR-304 | 10298 | 6839 | 0 | miR-304 | 10500 | 4048 | 0 |
| miR-304 | 7239 | 2832 | 0 | miR-304 | 9653  | 6462 | 0 | miR-304 | 10010 | 3993 | 0 |
| miR-304 | 7673 | 3088 | 0 | miR-304 | 10237 | 6905 | 0 | miR-304 | 8711  | 3845 | 0 |
| miR-305 | 7211 | 2734 | 0 | miR-305 | 9300  | 6503 | 0 | miR-305 | 13625 | 3847 | 0 |
| miR-305 | 7537 | 2820 | 0 | miR-305 | 8837  | 6385 | 0 | miR-305 | 12699 | 3817 | 0 |

|           |       |      |   |           |       |      |   |           |       |      |   |
|-----------|-------|------|---|-----------|-------|------|---|-----------|-------|------|---|
| miR-305   | 7519  | 2743 | 0 | miR-305   | 8899  | 6469 | 0 | miR-305   | 12594 | 3718 | 0 |
| miR-306   | 9475  | 2812 | 0 | miR-306   | 10700 | 6844 | 0 | miR-306   | 11265 | 4085 | 0 |
| miR-306   | 9372  | 2806 | 0 | miR-306   | 10240 | 6496 | 0 | miR-306   | 10782 | 4037 | 0 |
| miR-306   | 9911  | 3103 | 0 | miR-306   | 10879 | 6906 | 0 | miR-306   | 9580  | 3877 | 0 |
| miR-307   | 8318  | 2736 | 0 | miR-307   | 8400  | 6489 | 0 | miR-307   | 14835 | 3777 | 0 |
| miR-307   | 8394  | 2806 | 0 | miR-307   | 8072  | 6310 | 0 | miR-307   | 13475 | 3754 | 0 |
| miR-307   | 8457  | 2717 | 0 | miR-307   | 8224  | 6447 | 0 | miR-307   | 13690 | 3687 | 0 |
| miR-308   | 10114 | 2862 | 0 | miR-308   | 10416 | 6766 | 0 | miR-308   | 11529 | 4042 | 0 |
| miR-308   | 9245  | 2820 | 0 | miR-308   | 9850  | 6502 | 0 | miR-308   | 11309 | 4057 | 0 |
| miR-308   | 11199 | 3128 | 0 | miR-308   | 10793 | 6883 | 0 | miR-308   | 8876  | 3844 | 0 |
| miR-309   | 5353  | 2388 | 0 | miR-309   | 14986 | 8460 | 0 | miR-309   | 16758 | 7488 | 0 |
| miR-309   | 5625  | 2416 | 0 | miR-309   | 13933 | 7867 | 0 | miR-309   | 15832 | 7565 | 0 |
| miR-309   | 5749  | 2357 | 0 | miR-309   | 13994 | 7758 | 0 | miR-309   | 17357 | 7688 | 0 |
| miR-30-as | 6839  | 2264 | 0 | miR-30-as | 11494 | 6320 | 0 | miR-30-as | 13953 | 6165 | 0 |
| miR-30-as | 6432  | 2287 | 0 | miR-30-as | 12340 | 6511 | 0 | miR-30-as | 15051 | 6295 | 0 |
| miR-30-as | 6797  | 2271 | 0 | miR-30-as | 11802 | 6338 | 0 | miR-30-as | 13689 | 6129 | 0 |
| miR-30a-s | 2834  | 1995 | 0 | miR-30a-s | 10928 | 7590 | 0 | miR-30a-s | 10353 | 7433 | 0 |
| miR-30a-s | 2813  | 1994 | 0 | miR-30a-s | 10970 | 7526 | 0 | miR-30a-s | 10615 | 7577 | 0 |
| miR-30a-s | 2796  | 1993 | 0 | miR-30a-s | 10803 | 7730 | 0 | miR-30a-s | 10531 | 7480 | 0 |
| miR-31    | 6377  | 1989 | 0 | miR-31    | 23645 | 7606 | 0 | miR-31    | 27310 | 7468 | 0 |
| miR-31    | 6290  | 1998 | 0 | miR-31    | 24060 | 7537 | 0 | miR-31    | 27092 | 7525 | 0 |
| miR-31    | 6161  | 1990 | 0 | miR-31    | 24014 | 7705 | 0 | miR-31    | 28089 | 7474 | 0 |
| miR-310   | 5114  | 2070 | 0 | miR-310   | 15692 | 8028 | 0 | miR-310   | 19031 | 7916 | 0 |
| miR-310   | 4705  | 2067 | 0 | miR-310   | 16958 | 8219 | 0 | miR-310   | 18766 | 7972 | 0 |
| miR-310   | 5065  | 2057 | 0 | miR-310   | 17560 | 8340 | 0 | miR-310   | 19095 | 7925 | 0 |
| miR-311   | 8484  | 2359 | 0 | miR-311   | 22147 | 8548 | 0 | miR-311   | 23046 | 7628 | 0 |
| miR-311   | 8464  | 2404 | 0 | miR-311   | 18984 | 7817 | 0 | miR-311   | 23435 | 7542 | 0 |
| miR-311   | 8340  | 2365 | 0 | miR-311   | 19947 | 7963 | 0 | miR-311   | 24126 | 7759 | 0 |
| miR-312   | 5096  | 2041 | 0 | miR-312   | 17285 | 7829 | 0 | miR-312   | 18670 | 7817 | 0 |
| miR-312   | 5018  | 2034 | 0 | miR-312   | 20200 | 8118 | 0 | miR-312   | 19680 | 7885 | 0 |
| miR-312   | 4733  | 2032 | 0 | miR-312   | 17718 | 8084 | 0 | miR-312   | 19410 | 7876 | 0 |
| miR-313   | 6106  | 2355 | 0 | miR-313   | 18863 | 8543 | 0 | miR-313   | 18125 | 7690 | 0 |
| miR-313   | 5883  | 2414 | 0 | miR-313   | 15171 | 7735 | 0 | miR-313   | 16773 | 7467 | 0 |
| miR-313   | 6215  | 2332 | 0 | miR-313   | 18339 | 8427 | 0 | miR-313   | 18086 | 7794 | 0 |
| miR-314   | 5007  | 1996 | 0 | miR-314   | 16789 | 7473 | 0 | miR-314   | 19914 | 7711 | 0 |
| miR-314   | 5041  | 2029 | 0 | miR-314   | 21875 | 7884 | 0 | miR-314   | 20130 | 7773 | 0 |
| miR-314   | 4871  | 1965 | 0 | miR-314   | 19431 | 7654 | 0 | miR-314   | 19905 | 7792 | 0 |
| miR-315   | 6178  | 2311 | 0 | miR-315   | 14546 | 8500 | 0 | miR-315   | 19185 | 7624 | 0 |
| miR-315   | 6347  | 2404 | 0 | miR-315   | 11579 | 7600 | 0 | miR-315   | 16554 | 7332 | 0 |
| miR-315   | 6169  | 2276 | 0 | miR-315   | 14931 | 8484 | 0 | miR-315   | 18898 | 7657 | 0 |
| miR-316   | 3869  | 1991 | 0 | miR-316   | 10846 | 7349 | 0 | miR-316   | 11783 | 7725 | 0 |
| miR-316   | 4065  | 2040 | 0 | miR-316   | 13826 | 8059 | 0 | miR-316   | 13453 | 7878 | 0 |
| miR-316   | 3781  | 1953 | 0 | miR-316   | 11909 | 7480 | 0 | miR-316   | 13446 | 7770 | 0 |
| miR-317   | 7225  | 2729 | 0 | miR-317   | 9130  | 6567 | 0 | miR-317   | 13435 | 3779 | 0 |
| miR-317   | 7217  | 2816 | 0 | miR-317   | 9117  | 6300 | 0 | miR-317   | 12152 | 3715 | 0 |
| miR-317   | 7176  | 2700 | 0 | miR-317   | 8991  | 6490 | 0 | miR-317   | 12850 | 3683 | 0 |
| miR-318   | 10008 | 2943 | 0 | miR-318   | 9953  | 6688 | 0 | miR-318   | 9926  | 4062 | 0 |
| miR-318   | 9867  | 2835 | 0 | miR-318   | 9640  | 6476 | 0 | miR-318   | 10971 | 4091 | 0 |
| miR-318   | 11700 | 3224 | 0 | miR-318   | 10348 | 6840 | 0 | miR-318   | 8430  | 3791 | 0 |

|         |       |      |     |         |       |      |     |         |       |      |   |
|---------|-------|------|-----|---------|-------|------|-----|---------|-------|------|---|
| miR-32  | 2930  | 2280 | 0   | miR-32  | 7017  | 6313 | 0   | miR-32  | 7462  | 6229 | 0 |
| miR-32  | 2877  | 2279 | 0   | miR-32  | 7175  | 6441 | 0   | miR-32  | 7798  | 6208 | 0 |
| miR-32  | 2897  | 2274 | 0   | miR-32  | 7098  | 6390 | 0   | miR-32  | 7351  | 6168 | 0 |
| miR-320 | 5445  | 2719 | 0   | miR-320 | 8835  | 6651 | 0   | miR-320 | 11353 | 3835 | 0 |
| miR-320 | 4752  | 2855 | 0   | miR-320 | 8176  | 6261 | 0   | miR-320 | 9918  | 3761 | 0 |
| miR-320 | 5418  | 2690 | 0   | miR-320 | 8453  | 6484 | 0   | miR-320 | 10754 | 3700 | 0 |
| miR-321 | 65535 | 3040 | 0   | miR-321 | 65535 | 6634 | 0   | miR-321 | 65535 | 4012 | 0 |
| miR-321 | 65535 | 2825 | 0   | miR-321 | 65535 | 6550 | 0   | miR-321 | 65535 | 4091 | 0 |
| miR-321 | 65535 | 3256 | 0   | miR-321 | 65535 | 6808 | 0   | miR-321 | 65535 | 3779 | 0 |
| miR-322 | 6860  | 2741 | 0   | miR-322 | 8467  | 6661 | 0   | miR-322 | 12615 | 3891 | 0 |
| miR-322 | 6875  | 2837 | 0   | miR-322 | 8227  | 6309 | 0   | miR-322 | 10968 | 3801 | 0 |
| miR-322 | 7027  | 2707 | 0   | miR-322 | 8579  | 6530 | 0   | miR-322 | 11791 | 3723 | 0 |
| miR-323 | 19553 | 3149 | 0   | miR-323 | 12913 | 6541 | 0   | miR-323 | 17405 | 4033 | 0 |
| miR-323 | 16787 | 2854 | 0   | miR-323 | 12419 | 6424 | 0   | miR-323 | 19985 | 4026 | 0 |
| miR-323 | 25071 | 3294 | 0   | miR-323 | 14006 | 6810 | 0   | miR-323 | 15718 | 3772 | 0 |
| miR-324 | 4549  | 2702 | 0   | miR-324 | 7715  | 6677 | 0   | miR-324 | 6682  | 3869 | 0 |
| miR-324 | 4886  | 2795 | 0   | miR-324 | 7225  | 6337 | 0   | miR-324 | 6514  | 3758 | 0 |
| miR-324 | 4685  | 2708 | 0   | miR-324 | 7501  | 6575 | 0   | miR-324 | 6469  | 3729 | 0 |
| miR-325 | 4149  | 3036 | 0   | miR-325 | 7330  | 6516 | 0   | miR-325 | 5415  | 3949 | 0 |
| miR-325 | 3720  | 2784 | 0   | miR-325 | 7134  | 6190 | 0   | miR-325 | 5286  | 3993 | 0 |
| miR-325 | 4442  | 3232 | 0   | miR-325 | 7576  | 6809 | 0   | miR-325 | 4867  | 3697 | 0 |
| miR-326 | 10023 | 2235 | 0   | miR-326 | 21731 | 8265 | 0   | miR-326 | 26055 | 7465 | 0 |
| miR-326 | 10328 | 2370 | 0   | miR-326 | 16584 | 7477 | 0   | miR-326 | 25036 | 7072 | 0 |
| miR-326 | 9806  | 2199 | 0   | miR-326 | 24791 | 8260 | 0   | miR-326 | 29011 | 7537 | 0 |
| miR-327 | 5294  | 2021 | 0   | miR-327 | 14856 | 7265 | 0   | miR-327 | 19839 | 7720 | 0 |
| miR-327 | 5578  | 2079 | 0   | miR-327 | 21012 | 8319 | 0   | miR-327 | 20710 | 7939 | 0 |
| miR-327 | 5095  | 2003 | 0   | miR-327 | 15412 | 7374 | 0   | miR-327 | 19819 | 7809 | 0 |
| miR-328 | 0     | 0    | -50 | miR-328 | 0     | 0    | -50 | miR-328 | 30703 | 7533 | 0 |
| miR-328 | 0     | 0    | -50 | miR-328 | 0     | 0    | -50 | miR-328 | 27058 | 6959 | 0 |
| miR-328 | 0     | 0    | -50 | miR-328 | 0     | 0    | -50 | miR-328 | 30405 | 7562 | 0 |
| miR-329 | 6867  | 1983 | 0   | miR-329 | 19585 | 7144 | 0   | miR-329 | 28155 | 7665 | 0 |
| miR-329 | 7180  | 2077 | 0   | miR-329 | 32738 | 8321 | 0   | miR-329 | 29936 | 7938 | 0 |
| miR-329 | 6354  | 2006 | 0   | miR-329 | 20177 | 7284 | 0   | miR-329 | 29098 | 7755 | 0 |
| miR-33  | 2729  | 1994 | 0   | miR-33  | 10736 | 7558 | 0   | miR-33  | 10658 | 7516 | 0 |
| miR-33  | 2842  | 1991 | 0   | miR-33  | 10684 | 7525 | 0   | miR-33  | 10507 | 7560 | 0 |
| miR-33  | 2792  | 1973 | 0   | miR-33  | 10879 | 7664 | 0   | miR-33  | 10547 | 7520 | 0 |
| miR-330 | 7444  | 2180 | 0   | miR-330 | 21361 | 8244 | 0   | miR-330 | 24732 | 7572 | 0 |
| miR-330 | 7077  | 2318 | 0   | miR-330 | 17733 | 7028 | 0   | miR-330 | 19225 | 6836 | 0 |
| miR-330 | 5708  | 2156 | 0   | miR-330 | 21313 | 8105 | 0   | miR-330 | 24125 | 7570 | 0 |
| miR-331 | 7534  | 1990 | 0   | miR-331 | 21601 | 7044 | 0   | miR-331 | 31646 | 7667 | 0 |
| miR-331 | 7794  | 2093 | 0   | miR-331 | 33972 | 8249 | 0   | miR-331 | 31778 | 7810 | 0 |
| miR-331 | 7527  | 1979 | 0   | miR-331 | 22027 | 7215 | 0   | miR-331 | 32730 | 7759 | 0 |
| miR-333 | 6783  | 2189 | 0   | miR-333 | 14269 | 8363 | 0   | miR-333 | 20278 | 7604 | 0 |
| miR-333 | 6508  | 2329 | 0   | miR-333 | 11941 | 7150 | 0   | miR-333 | 14554 | 6882 | 0 |
| miR-333 | 6607  | 2156 | 0   | miR-333 | 13409 | 8168 | 0   | miR-333 | 21781 | 7567 | 0 |
| miR-335 | 3036  | 2019 | 0   | miR-335 | 11748 | 7009 | 0   | miR-335 | 16133 | 7618 | 0 |
| miR-335 | 3428  | 2093 | 0   | miR-335 | 18597 | 8116 | 0   | miR-335 | 17201 | 7792 | 0 |
| miR-335 | 2914  | 1978 | 0   | miR-335 | 11259 | 7024 | 0   | miR-335 | 15530 | 7749 | 0 |
| miR-336 | 10160 | 2653 | 0   | miR-336 | 10212 | 6676 | 0   | miR-336 | 20804 | 3859 | 0 |

|         |       |      |   |         |       |      |     |         |       |      |   |
|---------|-------|------|---|---------|-------|------|-----|---------|-------|------|---|
| miR-336 | 10846 | 2781 | 0 | miR-336 | 10522 | 6331 | 0   | miR-336 | 17539 | 3723 | 0 |
| miR-336 | 10013 | 2669 | 0 | miR-336 | 10592 | 6547 | 0   | miR-336 | 18324 | 3686 | 0 |
| miR-337 | 10464 | 2977 | 0 | miR-337 | 10501 | 6495 | 0   | miR-337 | 10673 | 3740 | 0 |
| miR-337 | 9426  | 2704 | 0 | miR-337 | 8491  | 5693 | 0   | miR-337 | 12842 | 3978 | 0 |
| miR-337 | 13818 | 3235 | 0 | miR-337 | 10488 | 6778 | 0   | miR-337 | 8802  | 3539 | 0 |
| miR-338 | 22818 | 2637 | 0 | miR-338 | 28619 | 6707 | 0   | miR-338 | 28823 | 3849 | 0 |
| miR-338 | 23494 | 2811 | 0 | miR-338 | 28027 | 6292 | 0   | miR-338 | 25687 | 3696 | 0 |
| miR-338 | 23434 | 2653 | 0 | miR-338 | 28411 | 6550 | 0   | miR-338 | 27778 | 3721 | 0 |
| miR-339 | 21600 | 2864 | 0 | miR-339 | 14362 | 6432 | 0   | miR-339 | 15790 | 3544 | 0 |
| miR-339 | 15575 | 2620 | 0 | miR-339 | 10695 | 5513 | 0   | miR-339 | 19450 | 3920 | 0 |
| miR-339 | 26827 | 3080 | 0 | miR-339 | 14478 | 6755 | 0   | miR-339 | 13583 | 3405 | 0 |
| miR-34  | 3403  | 2689 | 0 | miR-34  | 0     | 0    | -50 | miR-34  | 4268  | 3503 | 0 |
| miR-34  | 3455  | 2682 | 0 | miR-34  | 0     | 0    | -50 | miR-34  | 4279  | 3477 | 0 |
| miR-34  | 3368  | 2625 | 0 | miR-34  | 0     | 0    | -50 | miR-34  | 4350  | 3441 | 0 |
| miR-340 | 3335  | 2610 | 0 | miR-340 | 0     | 0    | -50 | miR-340 | 5445  | 3818 | 0 |
| miR-340 | 3474  | 2767 | 0 | miR-340 | 0     | 0    | -50 | miR-340 | 4767  | 3676 | 0 |
| miR-340 | 3402  | 2612 | 0 | miR-340 | 0     | 0    | -50 | miR-340 | 5088  | 3692 | 0 |
| miR-341 | 9917  | 2810 | 0 | miR-341 | 10646 | 6459 | 0   | miR-341 | 8351  | 3482 | 0 |
| miR-341 | 8944  | 2577 | 0 | miR-341 | 7432  | 5702 | 0   | miR-341 | 11596 | 3840 | 0 |
| miR-341 | 11518 | 3023 | 0 | miR-341 | 10444 | 6688 | 0   | miR-341 | 7177  | 3330 | 0 |
| miR-342 | 5989  | 2561 | 0 | miR-342 | 10537 | 6629 | 0   | miR-342 | 8548  | 3786 | 0 |
| miR-342 | 6250  | 2697 | 0 | miR-342 | 9493  | 6132 | 0   | miR-342 | 10622 | 3595 | 0 |
| miR-342 | 5887  | 2561 | 0 | miR-342 | 10215 | 6499 | 0   | miR-342 | 11365 | 3673 | 0 |
| miR-343 | 15123 | 2759 | 0 | miR-343 | 13685 | 6414 | 0   | miR-343 | 10867 | 3404 | 0 |
| miR-343 | 12447 | 2503 | 0 | miR-343 | 8262  | 5860 | 0   | miR-343 | 15175 | 3773 | 0 |
| miR-343 | 20128 | 2944 | 0 | miR-343 | 13527 | 6634 | 0   | miR-343 | 10403 | 3236 | 0 |
| miR-344 | 6984  | 2186 | 0 | miR-344 | 21371 | 8488 | 0   | miR-344 | 23029 | 7633 | 0 |
| miR-344 | 6474  | 2355 | 0 | miR-344 | 14495 | 7029 | 0   | miR-344 | 17888 | 6832 | 0 |
| miR-344 | 6921  | 2166 | 0 | miR-344 | 19908 | 8208 | 0   | miR-344 | 24017 | 7602 | 0 |
| miR-345 | 5333  | 1998 | 0 | miR-345 | 12466 | 6884 | 0   | miR-345 | 20268 | 7541 | 0 |
| miR-345 | 6241  | 2062 | 0 | miR-345 | 20962 | 8178 | 0   | miR-345 | 23249 | 7779 | 0 |
| miR-345 | 5590  | 2007 | 0 | miR-345 | 12753 | 6968 | 0   | miR-345 | 20754 | 7708 | 0 |
| miR-346 | 9245  | 2178 | 0 | miR-346 | 21364 | 8434 | 0   | miR-346 | 29012 | 7649 | 0 |
| miR-346 | 8540  | 2350 | 0 | miR-346 | 15366 | 6672 | 0   | miR-346 | 23028 | 6793 | 0 |
| miR-346 | 8534  | 2143 | 0 | miR-346 | 23020 | 8143 | 0   | miR-346 | 28773 | 7579 | 0 |
| miR-347 | 7058  | 1963 | 0 | miR-347 | 17292 | 6873 | 0   | miR-347 | 24434 | 7572 | 0 |
| miR-347 | 7460  | 2071 | 0 | miR-347 | 26984 | 8273 | 0   | miR-347 | 24162 | 7838 | 0 |
| miR-347 | 7239  | 1989 | 0 | miR-347 | 17765 | 6913 | 0   | miR-347 | 25149 | 7703 | 0 |
| miR-349 | 10249 | 2115 | 0 | miR-349 | 25537 | 8434 | 0   | miR-349 | 31502 | 7567 | 0 |
| miR-349 | 9119  | 2332 | 0 | miR-349 | 14789 | 7005 | 0   | miR-349 | 22827 | 6648 | 0 |
| miR-349 | 9256  | 2111 | 0 | miR-349 | 26060 | 8167 | 0   | miR-349 | 31309 | 7518 | 0 |
| miR-34a | 7150  | 2527 | 0 | miR-34a | 10474 | 7200 | 0   | miR-34a | 23511 | 6954 | 0 |
| miR-34a | 6713  | 2783 | 0 | miR-34a | 9678  | 7096 | 0   | miR-34a | 16072 | 6080 | 0 |
| miR-34a | 7115  | 2531 | 0 | miR-34a | 10076 | 7230 | 0   | miR-34a | 23027 | 6750 | 0 |
| miR-34b | 2956  | 1628 | 0 | miR-34b | 20601 | 7578 | 0   | miR-34b | 9662  | 5518 | 0 |
| miR-34b | 2848  | 1661 | 0 | miR-34b | 18574 | 7921 | 0   | miR-34b | 10442 | 5879 | 0 |
| miR-34b | 3145  | 1668 | 0 | miR-34b | 22633 | 8049 | 0   | miR-34b | 10118 | 5832 | 0 |
| miR-34c | 6781  | 2522 | 0 | miR-34c | 12794 | 7306 | 0   | miR-34c | 21161 | 6551 | 0 |
| miR-34c | 6493  | 2721 | 0 | miR-34c | 11366 | 6912 | 0   | miR-34c | 18141 | 6160 | 0 |

|          |       |      |   |          |       |      |     |          |       |      |   |
|----------|-------|------|---|----------|-------|------|-----|----------|-------|------|---|
| miR-34c  | 6498  | 2514 | 0 | miR-34c  | 12838 | 7227 | 0   | miR-34c  | 21620 | 6365 | 0 |
| miR-35   | 3159  | 2301 | 0 | miR-35   | 7259  | 6769 | 0   | miR-35   | 4848  | 3604 | 0 |
| miR-35   | 3143  | 2296 | 0 | miR-35   | 7401  | 6744 | 0   | miR-35   | 4877  | 3539 | 0 |
| miR-35   | 3151  | 2387 | 0 | miR-35   | 7466  | 6763 | 0   | miR-35   | 4455  | 3432 | 0 |
| miR-350  | 4694  | 1964 | 0 | miR-350  | 12901 | 6859 | 0   | miR-350  | 19192 | 7619 | 0 |
| miR-350  | 5439  | 2109 | 0 | miR-350  | 24109 | 8204 | 0   | miR-350  | 21129 | 7873 | 0 |
| miR-350  | 4459  | 1989 | 0 | miR-350  | 13288 | 6839 | 0   | miR-350  | 20296 | 7717 | 0 |
| miR-351  | 7360  | 2086 | 0 | miR-351  | 16636 | 8421 | 0   | miR-351  | 24833 | 7625 | 0 |
| miR-351  | 6564  | 2288 | 0 | miR-351  | 12323 | 7292 | 0   | miR-351  | 15213 | 6571 | 0 |
| miR-351  | 6633  | 2063 | 0 | miR-351  | 18244 | 8278 | 0   | miR-351  | 24822 | 7539 | 0 |
| miR-352  | 4471  | 1942 | 0 | miR-352  | 12209 | 6703 | 0   | miR-352  | 19993 | 7561 | 0 |
| miR-352  | 5294  | 2092 | 0 | miR-352  | 22374 | 8071 | 0   | miR-352  | 20289 | 7792 | 0 |
| miR-352  | 4680  | 1976 | 0 | miR-352  | 12554 | 6747 | 0   | miR-352  | 20163 | 7756 | 0 |
| miR-36   | 3420  | 2719 | 0 | miR-36   | 0     | 0    | -50 | miR-36   | 4325  | 3507 | 0 |
| miR-36   | 3360  | 2655 | 0 | miR-36   | 0     | 0    | -50 | miR-36   | 4290  | 3462 | 0 |
| miR-36   | 3283  | 2643 | 0 | miR-36   | 0     | 0    | -50 | miR-36   | 4209  | 3419 | 0 |
| miR-361  | 5264  | 2257 | 0 | miR-361  | 16336 | 7355 | 0   | miR-361  | 24157 | 7272 | 0 |
| miR-361  | 5613  | 2394 | 0 | miR-361  | 15213 | 7248 | 0   | miR-361  | 17784 | 6689 | 0 |
| miR-361  | 4659  | 2280 | 0 | miR-361  | 16018 | 7359 | 0   | miR-361  | 23179 | 7016 | 0 |
| miR-365  | 3393  | 1812 | 0 | miR-365  | 15925 | 6709 | 0   | miR-365  | 10687 | 5698 | 0 |
| miR-365  | 3285  | 1796 | 0 | miR-365  | 18425 | 6801 | 0   | miR-365  | 10556 | 5763 | 0 |
| miR-365  | 3332  | 1810 | 0 | miR-365  | 15413 | 6888 | 0   | miR-365  | 11205 | 5933 | 0 |
| miR-367  | 4181  | 2366 | 0 | miR-367  | 13817 | 7458 | 0   | miR-367  | 15283 | 6819 | 0 |
| miR-367  | 3591  | 2340 | 0 | miR-367  | 14046 | 7461 | 0   | miR-367  | 17527 | 7299 | 0 |
| miR-367  | 3803  | 2387 | 0 | miR-367  | 12815 | 7034 | 0   | miR-367  | 13818 | 6581 | 0 |
| miR-368  | 2862  | 2027 | 0 | miR-368  | 12580 | 7583 | 0   | miR-368  | 8692  | 6079 | 0 |
| miR-368  | 2683  | 1910 | 0 | miR-368  | 13792 | 7686 | 0   | miR-368  | 8652  | 6005 | 0 |
| miR-368  | 2897  | 1997 | 0 | miR-368  | 12329 | 7634 | 0   | miR-368  | 8919  | 6374 | 0 |
| miR-369  | 3672  | 2307 | 0 | miR-369  | 11916 | 6935 | 0   | miR-369  | 14196 | 6354 | 0 |
| miR-369  | 3688  | 2294 | 0 | miR-369  | 13769 | 7487 | 0   | miR-369  | 18679 | 7198 | 0 |
| miR-369  | 3790  | 2301 | 0 | miR-369  | 11391 | 6615 | 0   | miR-369  | 11685 | 6125 | 0 |
| miR-37   | 10498 | 2314 | 0 | miR-37   | 12912 | 6665 | 0   | miR-37   | 20872 | 3606 | 0 |
| miR-37   | 9805  | 2306 | 0 | miR-37   | 12471 | 6698 | 0   | miR-37   | 18607 | 3538 | 0 |
| miR-37   | 11212 | 2408 | 0 | miR-37   | 12270 | 6750 | 0   | miR-37   | 18324 | 3470 | 0 |
| miR-370  | 6825  | 1738 | 0 | miR-370  | 24665 | 6325 | 0   | miR-370  | 13053 | 5586 | 0 |
| miR-370  | 6549  | 1630 | 0 | miR-370  | 29541 | 6245 | 0   | miR-370  | 12185 | 5479 | 0 |
| miR-370  | 6836  | 1752 | 0 | miR-370  | 24827 | 6262 | 0   | miR-370  | 14124 | 5839 | 0 |
| miR-371  | 7501  | 2715 | 0 | miR-371  | 10579 | 6902 | 0   | miR-371  | 20658 | 6132 | 0 |
| miR-371  | 8061  | 2700 | 0 | miR-371  | 12265 | 7421 | 0   | miR-371  | 28743 | 7116 | 0 |
| miR-371  | 9075  | 2724 | 0 | miR-371  | 11775 | 7006 | 0   | miR-371  | 21973 | 5926 | 0 |
| miR-372  | 2892  | 1607 | 0 | miR-372  | 17778 | 7368 | 0   | miR-372  | 11773 | 5767 | 0 |
| miR-372  | 3251  | 1721 | 0 | miR-372  | 22938 | 8396 | 0   | miR-372  | 11148 | 5632 | 0 |
| miR-372  | 3101  | 1696 | 0 | miR-372  | 18216 | 7567 | 0   | miR-372  | 12556 | 5974 | 0 |
| miR-373  | 5813  | 2637 | 0 | miR-373  | 9242  | 6806 | 0   | miR-373  | 16406 | 6251 | 0 |
| miR-373  | 6440  | 2617 | 0 | miR-373  | 10126 | 7309 | 0   | miR-373  | 17887 | 6491 | 0 |
| miR-373  | 5931  | 2655 | 0 | miR-373  | 9022  | 6785 | 0   | miR-373  | 16167 | 5983 | 0 |
| miR-373* | 5413  | 1574 | 0 | miR-373* | 28934 | 7537 | 0   | miR-373* | 14417 | 5716 | 0 |
| miR-373* | 5855  | 1655 | 0 | miR-373* | 35392 | 7868 | 0   | miR-373* | 13859 | 5647 | 0 |
| miR-373* | 5541  | 1641 | 0 | miR-373* | 31200 | 7802 | 0   | miR-373* | 15514 | 5990 | 0 |

|            |      |      |   |            |       |      |   |            |       |      |   |
|------------|------|------|---|------------|-------|------|---|------------|-------|------|---|
| miR-374    | 3728 | 2669 | 0 | miR-374    | 10104 | 7073 | 0 | miR-374    | 11983 | 6483 | 0 |
| miR-374    | 3787 | 2802 | 0 | miR-374    | 10830 | 7237 | 0 | miR-374    | 13334 | 6701 | 0 |
| miR-374    | 3703 | 2680 | 0 | miR-374    | 10622 | 7047 | 0 | miR-374    | 11965 | 6325 | 0 |
| miR-375    | 5273 | 1601 | 0 | miR-375    | 26789 | 7551 | 0 | miR-375    | 10841 | 5538 | 0 |
| miR-375    | 4992 | 1627 | 0 | miR-375    | 24090 | 7851 | 0 | miR-375    | 12895 | 5833 | 0 |
| miR-375    | 5654 | 1651 | 0 | miR-375    | 32391 | 8042 | 0 | miR-375    | 12740 | 5807 | 0 |
| miR-376a   | 3298 | 2658 | 0 | miR-376a   | 9695  | 7349 | 0 | miR-376a   | 10917 | 7116 | 0 |
| miR-376a   | 3614 | 2815 | 0 | miR-376a   | 9601  | 7106 | 0 | miR-376a   | 9637  | 6242 | 0 |
| miR-376a   | 3367 | 2649 | 0 | miR-376a   | 10640 | 7555 | 0 | miR-376a   | 11021 | 7028 | 0 |
| miR-376b   | 2462 | 1655 | 0 | miR-376b   | 20173 | 8056 | 0 | miR-376b   | 9660  | 5460 | 0 |
| miR-376b   | 2495 | 1702 | 0 | miR-376b   | 16837 | 7811 | 0 | miR-376b   | 10409 | 5968 | 0 |
| miR-376b   | 2791 | 1752 | 0 | miR-376b   | 21775 | 8617 | 0 | miR-376b   | 10229 | 5880 | 0 |
| miR-377    | 3719 | 2354 | 0 | miR-377    | 14505 | 7897 | 0 | miR-377    | 19801 | 7454 | 0 |
| miR-377    | 3588 | 2409 | 0 | miR-377    | 12143 | 6984 | 0 | miR-377    | 14150 | 6287 | 0 |
| miR-377    | 3721 | 2384 | 0 | miR-377    | 14321 | 7789 | 0 | miR-377    | 21962 | 7312 | 0 |
| miR-378    | 6929 | 1637 | 0 | miR-378    | 29629 | 6258 | 0 | miR-378    | 11486 | 5503 | 0 |
| miR-378    | 6938 | 1781 | 0 | miR-378    | 25569 | 6308 | 0 | miR-378    | 13672 | 5747 | 0 |
| miR-378    | 6843 | 1650 | 0 | miR-378    | 33896 | 6559 | 0 | miR-378    | 11854 | 5667 | 0 |
| miR-379    | 4524 | 2228 | 0 | miR-379    | 14524 | 7324 | 0 | miR-379    | 22179 | 7216 | 0 |
| miR-379    | 4951 | 2287 | 0 | miR-379    | 13727 | 6981 | 0 | miR-379    | 17565 | 6528 | 0 |
| miR-379    | 4458 | 2236 | 0 | miR-379    | 13904 | 7248 | 0 | miR-379    | 23006 | 6976 | 0 |
| miR-38     | 3388 | 2709 | 0 | miR-38     | 6176  | 5757 | 0 | miR-38     | 4379  | 3554 | 0 |
| miR-38     | 3414 | 2619 | 0 | miR-38     | 6165  | 5850 | 0 | miR-38     | 4296  | 3510 | 0 |
| miR-38     | 3353 | 2663 | 0 | miR-38     | 6271  | 5681 | 0 | miR-38     | 4322  | 3404 | 0 |
| miR-380-3p | 3757 | 1741 | 0 | miR-380-3p | 23020 | 6517 | 0 | miR-380-3p | 10983 | 5545 | 0 |
| miR-380-3p | 4014 | 1885 | 0 | miR-380-3p | 20907 | 7131 | 0 | miR-380-3p | 11618 | 5950 | 0 |
| miR-380-3p | 3878 | 1744 | 0 | miR-380-3p | 22958 | 6781 | 0 | miR-380-3p | 11357 | 5756 | 0 |
| miR-380-5p | 5573 | 2338 | 0 | miR-380-5p | 18059 | 7398 | 0 | miR-380-5p | 27289 | 7444 | 0 |
| miR-380-5p | 5403 | 2335 | 0 | miR-380-5p | 18042 | 7637 | 0 | miR-380-5p | 31159 | 7069 | 0 |
| miR-380-5p | 5398 | 2342 | 0 | miR-380-5p | 17449 | 7599 | 0 | miR-380-5p | 25674 | 7133 | 0 |
| miR-381    | 3112 | 1812 | 0 | miR-381    | 19253 | 6921 | 0 | miR-381    | 10340 | 5746 | 0 |
| miR-381    | 3374 | 1918 | 0 | miR-381    | 18117 | 7120 | 0 | miR-381    | 11066 | 5862 | 0 |
| miR-381    | 3352 | 1807 | 0 | miR-381    | 18825 | 7123 | 0 | miR-381    | 11290 | 5915 | 0 |
| miR-382    | 8288 | 2256 | 0 | miR-382    | 14878 | 7504 | 0 | miR-382    | 21350 | 7210 | 0 |
| miR-382    | 8249 | 2289 | 0 | miR-382    | 14669 | 7459 | 0 | miR-382    | 26871 | 7124 | 0 |
| miR-382    | 7944 | 2283 | 0 | miR-382    | 15045 | 7388 | 0 | miR-382    | 25990 | 6893 | 0 |
| miR-383    | 3255 | 1761 | 0 | miR-383    | 16087 | 6421 | 0 | miR-383    | 10178 | 5654 | 0 |
| miR-383    | 3045 | 1638 | 0 | miR-383    | 18617 | 6275 | 0 | miR-383    | 9815  | 5528 | 0 |
| miR-383    | 3310 | 1786 | 0 | miR-383    | 15657 | 6447 | 0 | miR-383    | 10934 | 5919 | 0 |
| miR-384    | 8517 | 2757 | 0 | miR-384    | 15095 | 6968 | 0 | miR-384    | 24326 | 6065 | 0 |
| miR-384    | 9179 | 2629 | 0 | miR-384    | 16412 | 7295 | 0 | miR-384    | 26925 | 7051 | 0 |
| miR-384    | 8816 | 2747 | 0 | miR-384    | 15519 | 7108 | 0 | miR-384    | 23843 | 5918 | 0 |
| miR-39     | 3031 | 2263 | 0 | miR-39     | 7045  | 6462 | 0 | miR-39     | 4896  | 3606 | 0 |
| miR-39     | 3059 | 2315 | 0 | miR-39     | 7087  | 6585 | 0 | miR-39     | 4849  | 3526 | 0 |
| miR-39     | 3154 | 2380 | 0 | miR-39     | 7287  | 6687 | 0 | miR-39     | 4552  | 3498 | 0 |
| miR-4      | 3825 | 2417 | 0 | miR-4      | 9194  | 6188 | 0 | miR-4      | 10656 | 5793 | 0 |

|          |      |      |   |          |       |      |   |          |       |      |   |
|----------|------|------|---|----------|-------|------|---|----------|-------|------|---|
| miR-4    | 3712 | 2261 | 0 | miR-4    | 12080 | 7252 | 0 | miR-4    | 13069 | 6436 | 0 |
| miR-4    | 3841 | 2420 | 0 | miR-4    | 9241  | 6226 | 0 | miR-4    | 10792 | 5839 | 0 |
| miR-40   | 3530 | 2715 | 0 | miR-40   | 6288  | 5784 | 0 | miR-40   | 4694  | 3579 | 0 |
| miR-40   | 3498 | 2600 | 0 | miR-40   | 6379  | 5891 | 0 | miR-40   | 4584  | 3543 | 0 |
| miR-40   | 3504 | 2654 | 0 | miR-40   | 6301  | 5658 | 0 | miR-40   | 4442  | 3401 | 0 |
| miR-409  | 4256 | 1598 | 0 | miR-409  | 30408 | 7340 | 0 | miR-409  | 15803 | 5850 | 0 |
| miR-409  | 4681 | 1700 | 0 | miR-409  | 39778 | 8289 | 0 | miR-409  | 13528 | 5803 | 0 |
| miR-409  | 4421 | 1692 | 0 | miR-409  | 33145 | 7612 | 0 | miR-409  | 15523 | 6034 | 0 |
| miR-41   | 3167 | 2291 | 0 | miR-41   | 7005  | 6520 | 0 | miR-41   | 4916  | 3628 | 0 |
| miR-41   | 2956 | 2320 | 0 | miR-41   | 7078  | 6643 | 0 | miR-41   | 4943  | 3570 | 0 |
| miR-41   | 3346 | 2421 | 0 | miR-41   | 7222  | 6555 | 0 | miR-41   | 4599  | 3482 | 0 |
| miR-410  | 5509 | 2692 | 0 | miR-410  | 13387 | 6864 | 0 | miR-410  | 17466 | 6193 | 0 |
| miR-410  | 4768 | 2589 | 0 | miR-410  | 13859 | 7427 | 0 | miR-410  | 19694 | 6563 | 0 |
| miR-410  | 4764 | 2708 | 0 | miR-410  | 12974 | 6881 | 0 | miR-410  | 15490 | 5990 | 0 |
| miR-411  | 3566 | 1602 | 0 | miR-411  | 23625 | 7741 | 0 | miR-411  | 13227 | 5800 | 0 |
| miR-411  | 4214 | 1668 | 0 | miR-411  | 30080 | 8191 | 0 | miR-411  | 12561 | 5726 | 0 |
| miR-411  | 3818 | 1679 | 0 | miR-411  | 25445 | 7996 | 0 | miR-411  | 14215 | 6007 | 0 |
| miR-412  | 9389 | 2724 | 0 | miR-412  | 15423 | 7069 | 0 | miR-412  | 30573 | 6494 | 0 |
| miR-412  | 9675 | 2798 | 0 | miR-412  | 16117 | 7352 | 0 | miR-412  | 31535 | 6770 | 0 |
| miR-412  | 9964 | 2758 | 0 | miR-412  | 15123 | 7124 | 0 | miR-412  | 30047 | 6396 | 0 |
| miR-42   | 8831 | 2262 | 0 | miR-42   | 14718 | 6360 | 0 | miR-42   | 19791 | 6246 | 0 |
| miR-42   | 8396 | 2279 | 0 | miR-42   | 14413 | 6392 | 0 | miR-42   | 17997 | 6188 | 0 |
| miR-42   | 8532 | 2262 | 0 | miR-42   | 14621 | 6465 | 0 | miR-42   | 18998 | 6174 | 0 |
| miR-425  | 4591 | 1735 | 0 | miR-425  | 34219 | 9333 | 0 | miR-425  | 13026 | 5989 | 0 |
| miR-425  | 4759 | 1795 | 0 | miR-425  | 37514 | 9931 | 0 | miR-425  | 12788 | 6058 | 0 |
| miR-425  | 4709 | 1791 | 0 | miR-425  | 35561 | 9970 | 0 | miR-425  | 14216 | 6307 | 0 |
| miR-429  | 7118 | 2747 | 0 | miR-429  | 13297 | 7290 | 0 | miR-429  | 21219 | 6691 | 0 |
| miR-429  | 6611 | 2779 | 0 | miR-429  | 12672 | 7226 | 0 | miR-429  | 22405 | 6607 | 0 |
| miR-429  | 6830 | 2765 | 0 | miR-429  | 12601 | 7164 | 0 | miR-429  | 22101 | 6598 | 0 |
| miR-43   | 2623 | 1991 | 0 | miR-43   | 10591 | 7495 | 0 | miR-43   | 10120 | 7553 | 0 |
| miR-43   | 2683 | 1992 | 0 | miR-43   | 10582 | 7614 | 0 | miR-43   | 10216 | 7482 | 0 |
| miR-43   | 2625 | 1973 | 0 | miR-43   | 10484 | 7653 | 0 | miR-43   | 10096 | 7556 | 0 |
| miR-430a | 3299 | 1695 | 0 | miR-430a | 17553 | 9210 | 0 | miR-430a | 9332  | 5898 | 0 |
| miR-430a | 3605 | 1764 | 0 | miR-430a | 18480 | 9604 | 0 | miR-430a | 9190  | 6015 | 0 |
| miR-430a | 3538 | 1777 | 0 | miR-430a | 19201 | 9565 | 0 | miR-430a | 9965  | 6168 | 0 |
| miR-430b | 4793 | 2736 | 0 | miR-430b | 10368 | 7327 | 0 | miR-430b | 15525 | 6718 | 0 |
| miR-430b | 4599 | 2857 | 0 | miR-430b | 9868  | 7219 | 0 | miR-430b | 14945 | 6585 | 0 |
| miR-430b | 4429 | 2755 | 0 | miR-430b | 10182 | 7253 | 0 | miR-430b | 15980 | 6626 | 0 |
| miR-430c | 3381 | 1725 | 0 | miR-430c | 17733 | 9011 | 0 | miR-430c | 8421  | 5791 | 0 |
| miR-430c | 3263 | 1812 | 0 | miR-430c | 17799 | 9857 | 0 | miR-430c | 8967  | 6139 | 0 |
| miR-430c | 3438 | 1788 | 0 | miR-430c | 20110 | 9727 | 0 | miR-430c | 9175  | 6140 | 0 |
| miR-44   | 2966 | 2259 | 0 | miR-44   | 7145  | 6375 | 0 | miR-44   | 7826  | 6322 | 0 |
| miR-44   | 2956 | 2281 | 0 | miR-44   | 7195  | 6380 | 0 | miR-44   | 7326  | 6128 | 0 |
| miR-44   | 2864 | 2268 | 0 | miR-44   | 7413  | 6549 | 0 | miR-44   | 7663  | 6261 | 0 |
| miR-448  | 3368 | 1715 | 0 | miR-448  | 28498 | 9175 | 0 | miR-448  | 11136 | 5828 | 0 |
| miR-448  | 3386 | 1761 | 0 | miR-448  | 29222 | 9804 | 0 | miR-448  | 11782 | 6058 | 0 |
| miR-448  | 3720 | 1755 | 0 | miR-448  | 30794 | 9628 | 0 | miR-448  | 12370 | 6145 | 0 |
| miR-449  | 7174 | 2556 | 0 | miR-449  | 10431 | 7308 | 0 | miR-449  | 19172 | 6560 | 0 |
| miR-449  | 6795 | 2689 | 0 | miR-449  | 9514  | 6889 | 0 | miR-449  | 16577 | 6192 | 0 |



|         |       |      |   |         |       |      |     |         |       |      |   |
|---------|-------|------|---|---------|-------|------|-----|---------|-------|------|---|
| miR-449 | 6972  | 2569 | 0 | miR-449 | 10639 | 7168 | 0   | miR-449 | 18849 | 6347 | 0 |
| miR-450 | 6898  | 2257 | 0 | miR-450 | 14126 | 6877 | 0   | miR-450 | 20217 | 6383 | 0 |
| miR-450 | 6129  | 2213 | 0 | miR-450 | 15393 | 7342 | 0   | miR-450 | 30242 | 7124 | 0 |
| miR-450 | 7271  | 2241 | 0 | miR-450 | 13725 | 6518 | 0   | miR-450 | 18304 | 6150 | 0 |
| miR-46  | 2800  | 1978 | 0 | miR-46  | 10788 | 7461 | 0   | miR-46  | 10405 | 7505 | 0 |
| miR-46  | 2763  | 2006 | 0 | miR-46  | 10885 | 7672 | 0   | miR-46  | 10367 | 7451 | 0 |
| miR-46  | 2731  | 1977 | 0 | miR-46  | 10873 | 7676 | 0   | miR-46  | 10321 | 7542 | 0 |
| miR-47  | 2846  | 2258 | 0 | miR-47  | 7210  | 6462 | 0   | miR-47  | 7622  | 6340 | 0 |
| miR-47  | 2812  | 2327 | 0 | miR-47  | 7050  | 6313 | 0   | miR-47  | 7168  | 6102 | 0 |
| miR-47  | 2905  | 2287 | 0 | miR-47  | 7277  | 6588 | 0   | miR-47  | 7518  | 6327 | 0 |
| miR-48  | 2730  | 1945 | 0 | miR-48  | 10336 | 7453 | 0   | miR-48  | 10371 | 7545 | 0 |
| miR-48  | 2726  | 1994 | 0 | miR-48  | 10549 | 7627 | 0   | miR-48  | 10199 | 7495 | 0 |
| miR-48  | 2674  | 2000 | 0 | miR-48  | 10691 | 7600 | 0   | miR-48  | 10346 | 7642 | 0 |
| miR-49  | 5001  | 2253 | 0 | miR-49  | 12574 | 6475 | 0   | miR-49  | 13958 | 6363 | 0 |
| miR-49  | 4811  | 2379 | 0 | miR-49  | 11812 | 6184 | 0   | miR-49  | 12616 | 6105 | 0 |
| miR-49  | 5068  | 2295 | 0 | miR-49  | 13095 | 6611 | 0   | miR-49  | 13657 | 6310 | 0 |
| miR-5   | 2093  | 2029 | 0 | miR-5   | 20080 | 8023 | 0   | miR-5   | 25501 | 7331 | 0 |
| miR-5   | 5603  | 2023 | 0 | miR-5   | 26246 | 7596 | 0   | miR-5   | 25254 | 7595 | 0 |
| miR-5   | 6047  | 2020 | 0 | miR-5   | 19824 | 8012 | 0   | miR-5   | 25536 | 7336 | 0 |
| miR-50  | 2718  | 1951 | 0 | miR-50  | 10522 | 7472 | 0   | miR-50  | 10251 | 7591 | 0 |
| miR-50  | 2730  | 2010 | 0 | miR-50  | 10399 | 7673 | 0   | miR-50  | 10199 | 7489 | 0 |
| miR-50  | 2720  | 1980 | 0 | miR-50  | 10668 | 7478 | 0   | miR-50  | 10280 | 7633 | 0 |
| miR-51  | 3283  | 2704 | 0 | miR-51  | 6100  | 5745 | 0   | miR-51  | 4577  | 3530 | 0 |
| miR-51  | 3285  | 2578 | 0 | miR-51  | 6256  | 5884 | 0   | miR-51  | 4379  | 3526 | 0 |
| miR-51  | 3263  | 2651 | 0 | miR-51  | 5974  | 5771 | 0   | miR-51  | 4229  | 3370 | 0 |
| miR-52  | 11933 | 2323 | 0 | miR-52  | 11625 | 6470 | 0   | miR-52  | 19075 | 3681 | 0 |
| miR-52  | 10821 | 2378 | 0 | miR-52  | 11630 | 6453 | 0   | miR-52  | 19749 | 3588 | 0 |
| miR-52  | 13746 | 2454 | 0 | miR-52  | 11418 | 6467 | 0   | miR-52  | 17666 | 3511 | 0 |
| miR-53  | 9340  | 2668 | 0 | miR-53  | 10065 | 5878 | 0   | miR-53  | 15880 | 3481 | 0 |
| miR-53  | 11896 | 2614 | 0 | miR-53  | 9314  | 5874 | 0   | miR-53  | 13480 | 3542 | 0 |
| miR-53  | 10723 | 2626 | 0 | miR-53  | 9873  | 5765 | 0   | miR-53  | 14783 | 3359 | 0 |
| miR-54  | 3190  | 2303 | 0 | miR-54  | 6824  | 6488 | 0   | miR-54  | 4863  | 3681 | 0 |
| miR-54  | 2975  | 2397 | 0 | miR-54  | 6711  | 6433 | 0   | miR-54  | 4595  | 3524 | 0 |
| miR-54  | 3253  | 2394 | 0 | miR-54  | 6966  | 6439 | 0   | miR-54  | 4566  | 3519 | 0 |
| miR-55  | 3105  | 2627 | 0 | miR-55  | 0     | 0    | -50 | miR-55  | 4443  | 3473 | 0 |
| miR-55  | 3195  | 2645 | 0 | miR-55  | 0     | 0    | -50 | miR-55  | 4440  | 3596 | 0 |
| miR-55  | 3247  | 2627 | 0 | miR-55  | 0     | 0    | -50 | miR-55  | 4061  | 3381 | 0 |
| miR-56* | 3197  | 2627 | 0 | miR-56* | 0     | 0    | -50 | miR-56* | 4506  | 3478 | 0 |
| miR-56* | 3176  | 2591 | 0 | miR-56* | 0     | 0    | -50 | miR-56* | 4416  | 3605 | 0 |
| miR-56* | 3210  | 2620 | 0 | miR-56* | 0     | 0    | -50 | miR-56* | 4370  | 3420 | 0 |
| miR-56  | 3234  | 2319 | 0 | miR-56  | 7036  | 6317 | 0   | miR-56  | 4964  | 3663 | 0 |
| miR-56  | 3194  | 2425 | 0 | miR-56  | 6985  | 6495 | 0   | miR-56  | 4601  | 3503 | 0 |
| miR-56  | 3411  | 2446 | 0 | miR-56  | 6826  | 6261 | 0   | miR-56  | 4634  | 3519 | 0 |
| miR-57  | 3172  | 2362 | 0 | miR-57  | 0     | 0    | -50 | miR-57  | 4906  | 3693 | 0 |
| miR-57  | 3165  | 2474 | 0 | miR-57  | 0     | 0    | -50 | miR-57  | 4579  | 3558 | 0 |
| miR-57  | 3305  | 2495 | 0 | miR-57  | 0     | 0    | -50 | miR-57  | 4524  | 3526 | 0 |
| miR-58  | 2920  | 2253 | 0 | miR-58  | 7317  | 6542 | 0   | miR-58  | 7813  | 6463 | 0 |
| miR-58  | 2959  | 2376 | 0 | miR-58  | 6582  | 6139 | 0   | miR-58  | 7208  | 6086 | 0 |
| miR-58  | 2978  | 2302 | 0 | miR-58  | 7561  | 6635 | 0   | miR-58  | 7629  | 6328 | 0 |

|        |      |      |   |        |       |      |     |        |       |      |     |
|--------|------|------|---|--------|-------|------|-----|--------|-------|------|-----|
| miR-59 | 2739 | 1973 | 0 | miR-59 | 10767 | 7396 | 0   | miR-59 | 0     | 0    | -50 |
| miR-59 | 2835 | 2079 | 0 | miR-59 | 10589 | 7808 | 0   | miR-59 | 0     | 0    | -50 |
| miR-59 | 2757 | 1977 | 0 | miR-59 | 10550 | 7464 | 0   | miR-59 | 0     | 0    | -50 |
| miR-6  | 3053 | 2397 | 0 | miR-6  | 6964  | 6362 | 0   | miR-6  | 6810  | 5859 | 0   |
| miR-6  | 3042 | 2272 | 0 | miR-6  | 8143  | 7087 | 0   | miR-6  | 8188  | 6451 | 0   |
| miR-6  | 3071 | 2375 | 0 | miR-6  | 6970  | 6364 | 0   | miR-6  | 6788  | 5808 | 0   |
| miR-60 | 2836 | 2233 | 0 | miR-60 | 7222  | 6625 | 0   | miR-60 | 7660  | 6426 | 0   |
| miR-60 | 2875 | 2361 | 0 | miR-60 | 6964  | 6386 | 0   | miR-60 | 6906  | 6020 | 0   |
| miR-60 | 2764 | 2267 | 0 | miR-60 | 7417  | 6738 | 0   | miR-60 | 7607  | 6410 | 0   |
| miR-61 | 2822 | 1996 | 0 | miR-61 | 10488 | 7311 | 0   | miR-61 | 10281 | 7692 | 0   |
| miR-61 | 2998 | 2175 | 0 | miR-61 | 10473 | 7913 | 0   | miR-61 | 10346 | 7425 | 0   |
| miR-61 | 2804 | 1989 | 0 | miR-61 | 11213 | 7628 | 0   | miR-61 | 10222 | 7575 | 0   |
| miR-62 | 2888 | 2241 | 0 | miR-62 | 7482  | 6735 | 0   | miR-62 | 7721  | 6409 | 0   |
| miR-62 | 2969 | 2353 | 0 | miR-62 | 7162  | 6449 | 0   | miR-62 | 6888  | 5961 | 0   |
| miR-62 | 2894 | 2251 | 0 | miR-62 | 7515  | 6871 | 0   | miR-62 | 7644  | 6387 | 0   |
| miR-63 | 4788 | 2038 | 0 | miR-63 | 21478 | 7475 | 0   | miR-63 | 22207 | 7514 | 0   |
| miR-63 | 4883 | 2181 | 0 | miR-63 | 20353 | 8096 | 0   | miR-63 | 23568 | 7402 | 0   |
| miR-63 | 4916 | 2012 | 0 | miR-63 | 22623 | 7623 | 0   | miR-63 | 22528 | 7564 | 0   |
| miR-64 | 4077 | 2263 | 0 | miR-64 | 13205 | 6972 | 0   | miR-64 | 12609 | 6471 | 0   |
| miR-64 | 4188 | 2355 | 0 | miR-64 | 10434 | 6450 | 0   | miR-64 | 10579 | 5877 | 0   |
| miR-64 | 3997 | 2252 | 0 | miR-64 | 12649 | 6887 | 0   | miR-64 | 12279 | 6375 | 0   |
| miR-65 | 6341 | 2038 | 0 | miR-65 | 23455 | 7726 | 0   | miR-65 | 23926 | 7588 | 0   |
| miR-65 | 6483 | 2134 | 0 | miR-65 | 19596 | 8227 | 0   | miR-65 | 24767 | 7431 | 0   |
| miR-65 | 6367 | 2049 | 0 | miR-65 | 23944 | 7903 | 0   | miR-65 | 24621 | 7640 | 0   |
| miR-66 | 4427 | 2637 | 0 | miR-66 | 8736  | 5924 | 0   | miR-66 | 8367  | 3548 | 0   |
| miR-66 | 4684 | 2609 | 0 | miR-66 | 7821  | 5896 | 0   | miR-66 | 6758  | 3638 | 0   |
| miR-66 | 4468 | 2650 | 0 | miR-66 | 8338  | 5852 | 0   | miR-66 | 7400  | 3502 | 0   |
| miR-67 | 4032 | 2453 | 0 | miR-67 | 9425  | 6358 | 0   | miR-67 | 9813  | 3756 | 0   |
| miR-67 | 3917 | 2551 | 0 | miR-67 | 9668  | 6530 | 0   | miR-67 | 9207  | 3639 | 0   |
| miR-67 | 4129 | 2587 | 0 | miR-67 | 9066  | 6231 | 0   | miR-67 | 9068  | 3619 | 0   |
| miR-68 | 3895 | 2630 | 0 | miR-68 | 8262  | 5948 | 0   | miR-68 | 7510  | 3527 | 0   |
| miR-68 | 3718 | 2633 | 0 | miR-68 | 7862  | 5796 | 0   | miR-68 | 6205  | 3642 | 0   |
| miR-68 | 3997 | 2633 | 0 | miR-68 | 8369  | 5868 | 0   | miR-68 | 6948  | 3434 | 0   |
| miR-69 | 4361 | 2425 | 0 | miR-69 | 9617  | 6391 | 0   | miR-69 | 10161 | 3786 | 0   |
| miR-69 | 4106 | 2526 | 0 | miR-69 | 9301  | 6541 | 0   | miR-69 | 9420  | 3637 | 0   |
| miR-69 | 4480 | 2603 | 0 | miR-69 | 8794  | 6189 | 0   | miR-69 | 9096  | 3624 | 0   |
| miR-7a | 3120 | 2056 | 0 | miR-7a | 10739 | 8067 | 0   | miR-7a | 10882 | 7340 | 0   |
| miR-7a | 2967 | 2041 | 0 | miR-7a | 12149 | 7739 | 0   | miR-7a | 10999 | 7610 | 0   |
| miR-7a | 3097 | 2044 | 0 | miR-7a | 10713 | 8089 | 0   | miR-7a | 10841 | 7382 | 0   |
| miR-70 | 3082 | 2591 | 0 | miR-70 | 6242  | 5886 | 0   | miR-70 | 4520  | 3477 | 0   |
| miR-70 | 3331 | 2627 | 0 | miR-70 | 6452  | 5765 | 0   | miR-70 | 4336  | 3639 | 0   |
| miR-70 | 3264 | 2624 | 0 | miR-70 | 6269  | 5904 | 0   | miR-70 | 4464  | 3374 | 0   |
| miR-71 | 6377 | 2414 | 0 | miR-71 | 7569  | 6193 | 0   | miR-71 | 11105 | 3787 | 0   |
| miR-71 | 5848 | 2466 | 0 | miR-71 | 8488  | 6455 | 0   | miR-71 | 10896 | 3588 | 0   |
| miR-71 | 6768 | 2538 | 0 | miR-71 | 8889  | 6105 | 0   | miR-71 | 9423  | 3580 | 0   |
| miR-72 | 6413 | 2531 | 0 | miR-72 | 8134  | 5939 | 0   | miR-72 | 10827 | 3444 | 0   |
| miR-72 | 6700 | 2532 | 0 | miR-72 | 7375  | 5532 | 0   | miR-72 | 8451  | 3604 | 0   |
| miR-72 | 7063 | 2577 | 0 | miR-72 | 7983  | 5785 | 0   | miR-72 | 10538 | 3364 | 0   |
| miR-73 | 3270 | 2421 | 0 | miR-73 | 0     | 0    | -50 | miR-73 | 5135  | 3807 | 0   |

|        |      |      |   |        |       |      |     |        |       |      |   |
|--------|------|------|---|--------|-------|------|-----|--------|-------|------|---|
| miR-73 | 3063 | 2463 | 0 | miR-73 | 0     | 0    | -50 | miR-73 | 4733  | 3565 | 0 |
| miR-73 | 3403 | 2486 | 0 | miR-73 | 0     | 0    | -50 | miR-73 | 4711  | 3619 | 0 |
| miR-74 | 3584 | 2253 | 0 | miR-74 | 12382 | 7156 | 0   | miR-74 | 12408 | 6545 | 0 |
| miR-74 | 3669 | 2414 | 0 | miR-74 | 9423  | 6347 | 0   | miR-74 | 10102 | 5894 | 0 |
| miR-74 | 3683 | 2259 | 0 | miR-74 | 12162 | 7032 | 0   | miR-74 | 12609 | 6389 | 0 |
| miR-75 | 8481 | 2020 | 0 | miR-75 | 33089 | 7669 | 0   | miR-75 | 33079 | 7581 | 0 |
| miR-75 | 9213 | 2072 | 0 | miR-75 | 27493 | 8122 | 0   | miR-75 | 32897 | 7349 | 0 |
| miR-75 | 8500 | 2033 | 0 | miR-75 | 36187 | 7747 | 0   | miR-75 | 34066 | 7639 | 0 |
| miR-76 | 5880 | 2231 | 0 | miR-76 | 11583 | 7086 | 0   | miR-76 | 14412 | 6524 | 0 |
| miR-76 | 5828 | 2415 | 0 | miR-76 | 8414  | 6255 | 0   | miR-76 | 9883  | 5849 | 0 |
| miR-76 | 5815 | 2268 | 0 | miR-76 | 11675 | 7246 | 0   | miR-76 | 13964 | 6395 | 0 |
| miR-77 | 2689 | 2026 | 0 | miR-77 | 10867 | 7505 | 0   | miR-77 | 9498  | 7578 | 0 |
| miR-77 | 2800 | 2046 | 0 | miR-77 | 10016 | 8031 | 0   | miR-77 | 9779  | 7310 | 0 |
| miR-77 | 2650 | 2005 | 0 | miR-77 | 11232 | 7660 | 0   | miR-77 | 10207 | 7634 | 0 |
| miR-78 | 2738 | 2198 | 0 | miR-78 | 7569  | 6811 | 0   | miR-78 | 7802  | 6512 | 0 |
| miR-78 | 2847 | 2416 | 0 | miR-78 | 6763  | 6266 | 0   | miR-78 | 6620  | 5810 | 0 |
| miR-78 | 2777 | 2228 | 0 | miR-78 | 8049  | 7239 | 0   | miR-78 | 7903  | 6429 | 0 |
| miR-79 | 4630 | 2025 | 0 | miR-79 | 31432 | 7579 | 0   | miR-79 | 25593 | 7665 | 0 |
| miR-79 | 5142 | 2065 | 0 | miR-79 | 24902 | 8085 | 0   | miR-79 | 24901 | 7378 | 0 |
| miR-79 | 4531 | 2024 | 0 | miR-79 | 31671 | 7764 | 0   | miR-79 | 27048 | 7635 | 0 |
| miR-8  | 3093 | 2539 | 0 | miR-8  | 0     | 0    | -50 | miR-8  | 4470  | 3604 | 0 |
| miR-8  | 3454 | 2645 | 0 | miR-8  | 0     | 0    | -50 | miR-8  | 4589  | 3499 | 0 |
| miR-8  | 3321 | 2644 | 0 | miR-8  | 0     | 0    | -50 | miR-8  | 4459  | 3576 | 0 |
| miR-80 | 5035 | 2202 | 0 | miR-80 | 12582 | 6701 | 0   | miR-80 | 15981 | 6511 | 0 |
| miR-80 | 4880 | 2467 | 0 | miR-80 | 9097  | 5904 | 0   | miR-80 | 10373 | 5694 | 0 |
| miR-80 | 5067 | 2232 | 0 | miR-80 | 13826 | 7180 | 0   | miR-80 | 15399 | 6463 | 0 |
| miR-81 | 2798 | 1999 | 0 | miR-81 | 11554 | 7705 | 0   | miR-81 | 9846  | 7661 | 0 |
| miR-81 | 2897 | 2056 | 0 | miR-81 | 10191 | 8145 | 0   | miR-81 | 10175 | 7425 | 0 |
| miR-81 | 2818 | 2022 | 0 | miR-81 | 11906 | 7856 | 0   | miR-81 | 10359 | 7668 | 0 |
| miR-83 | 3648 | 2500 | 0 | miR-83 | 8429  | 5639 | 0   | miR-83 | 10105 | 5397 | 0 |
| miR-83 | 4161 | 2610 | 0 | miR-83 | 10537 | 6881 | 0   | miR-83 | 11292 | 5829 | 0 |
| miR-83 | 3638 | 2489 | 0 | miR-83 | 8100  | 5604 | 0   | miR-83 | 10188 | 5308 | 0 |
| miR-84 | 5948 | 2344 | 0 | miR-84 | 10427 | 7082 | 0   | miR-84 | 20186 | 6490 | 0 |
| miR-84 | 5828 | 2195 | 0 | miR-84 | 10892 | 7471 | 0   | miR-84 | 25803 | 6888 | 0 |
| miR-84 | 6021 | 2361 | 0 | miR-84 | 9492  | 7083 | 0   | miR-84 | 20351 | 6319 | 0 |
| miR-85 | 4046 | 2518 | 0 | miR-85 | 8656  | 5855 | 0   | miR-85 | 10623 | 5447 | 0 |
| miR-85 | 4351 | 2601 | 0 | miR-85 | 10427 | 6896 | 0   | miR-85 | 12550 | 5722 | 0 |
| miR-85 | 3887 | 2517 | 0 | miR-85 | 8490  | 5729 | 0   | miR-85 | 10702 | 5334 | 0 |
| miR-86 | 7057 | 2298 | 0 | miR-86 | 13304 | 7093 | 0   | miR-86 | 24645 | 6415 | 0 |
| miR-86 | 6375 | 2197 | 0 | miR-86 | 15030 | 7384 | 0   | miR-86 | 30276 | 6781 | 0 |
| miR-86 | 7924 | 2313 | 0 | miR-86 | 13184 | 7168 | 0   | miR-86 | 24742 | 6299 | 0 |
| miR-87 | 5638 | 2550 | 0 | miR-87 | 7314  | 6016 | 0   | miR-87 | 10105 | 5494 | 0 |
| miR-87 | 5505 | 2601 | 0 | miR-87 | 8492  | 6925 | 0   | miR-87 | 11719 | 5708 | 0 |
| miR-87 | 5503 | 2544 | 0 | miR-87 | 7595  | 5972 | 0   | miR-87 | 10197 | 5428 | 0 |
| miR-88 | 8061 | 2320 | 0 | miR-88 | 10997 | 7130 | 0   | miR-88 | 23985 | 6403 | 0 |
| miR-88 | 7452 | 2209 | 0 | miR-88 | 14812 | 7453 | 0   | miR-88 | 28049 | 6733 | 0 |
| miR-88 | 7655 | 2269 | 0 | miR-88 | 10766 | 7160 | 0   | miR-88 | 24068 | 6309 | 0 |
| miR-89 | 4303 | 2578 | 0 | miR-89 | 8890  | 6013 | 0   | miR-89 | 10864 | 5562 | 0 |
| miR-89 | 4437 | 2617 | 0 | miR-89 | 10477 | 7007 | 0   | miR-89 | 12773 | 5811 | 0 |

|               |       |      |   |               |       |      |     |               |       |      |   |
|---------------|-------|------|---|---------------|-------|------|-----|---------------|-------|------|---|
| miR-89        | 3994  | 2559 | 0 | miR-89        | 8726  | 5799 | 0   | miR-89        | 10640 | 5462 | 0 |
| miR-9         | 3102  | 2439 | 0 | miR-9         | 0     | 0    | -50 | miR-9         | 5047  | 3645 | 0 |
| miR-9         | 3439  | 2444 | 0 | miR-9         | 0     | 0    | -50 | miR-9         | 4988  | 3615 | 0 |
| miR-9         | 3246  | 2484 | 0 | miR-9         | 0     | 0    | -50 | miR-9         | 4357  | 3464 | 0 |
| miR-90        | 10118 | 2287 | 0 | miR-90        | 13224 | 7138 | 0   | miR-90        | 28363 | 6416 | 0 |
| miR-90        | 8737  | 2209 | 0 | miR-90        | 14999 | 7290 | 0   | miR-90        | 32535 | 6675 | 0 |
| miR-90        | 8819  | 2219 | 0 | miR-90        | 13376 | 7242 | 0   | miR-90        | 28600 | 6339 | 0 |
| miR-17-5p     | 2279  | 1860 | 0 | miR-17-5p     | 0     | 0    | -50 | miR-17-5p     | 6608  | 5763 | 0 |
| miR-17-5p     | 2080  | 1612 | 0 | miR-17-5p     | 0     | 0    | -50 | miR-17-5p     | 7293  | 6047 | 0 |
| miR-17-5p     | 2439  | 1952 | 0 | miR-17-5p     | 0     | 0    | -50 | miR-17-5p     | 6724  | 5932 | 0 |
| miR-92        | 5390  | 1625 | 0 | miR-92        | 22175 | 7363 | 0   | miR-92        | 10117 | 5733 | 0 |
| miR-92        | 5400  | 1676 | 0 | miR-92        | 22385 | 6844 | 0   | miR-92        | 10500 | 5793 | 0 |
| miR-92        | 5922  | 1676 | 0 | miR-92        | 25913 | 7873 | 0   | miR-92        | 11697 | 5994 | 0 |
| miR-93        | 4263  | 1858 | 0 | miR-93        | 9315  | 5585 | 0   | miR-93        | 7877  | 5722 | 0 |
| miR-93        | 4038  | 1636 | 0 | miR-93        | 11996 | 7087 | 0   | miR-93        | 9536  | 6034 | 0 |
| miR-93        | 4482  | 1946 | 0 | miR-93        | 8898  | 5885 | 0   | miR-93        | 8005  | 5876 | 0 |
| miR-94        | 4513  | 1610 | 0 | miR-94        | 17353 | 7301 | 0   | miR-94        | 9237  | 5716 | 0 |
| miR-94        | 4228  | 1684 | 0 | miR-94        | 17120 | 6976 | 0   | miR-94        | 9325  | 5833 | 0 |
| miR-94        | 4699  | 1672 | 0 | miR-94        | 19445 | 7796 | 0   | miR-94        | 10167 | 5964 | 0 |
| miR-95        | 3612  | 1811 | 0 | miR-95        | 8773  | 5595 | 0   | miR-95        | 7920  | 5657 | 0 |
| miR-95        | 3477  | 1638 | 0 | miR-95        | 12227 | 6656 | 0   | miR-95        | 10049 | 5796 | 0 |
| miR-95        | 3966  | 1917 | 0 | miR-95        | 9100  | 5914 | 0   | miR-95        | 8689  | 5729 | 0 |
| miR-96        | 4578  | 1609 | 0 | miR-96        | 17155 | 6896 | 0   | miR-96        | 8511  | 5535 | 0 |
| miR-96        | 4614  | 1638 | 0 | miR-96        | 17212 | 6735 | 0   | miR-96        | 8960  | 5708 | 0 |
| miR-96        | 4909  | 1625 | 0 | miR-96        | 19148 | 7413 | 0   | miR-96        | 9405  | 5844 | 0 |
| miR-30a-5p    | 4067  | 1775 | 0 | miR-30a-5p    | 11976 | 5675 | 0   | miR-30a-5p    | 9939  | 5657 | 0 |
| miR-30a-5p    | 4292  | 1618 | 0 | miR-30a-5p    | 16222 | 6628 | 0   | miR-30a-5p    | 11843 | 5723 | 0 |
| miR-30a-5p    | 4470  | 1892 | 0 | miR-30a-5p    | 12373 | 5975 | 0   | miR-30a-5p    | 10658 | 5672 | 0 |
| miR-98        | 5209  | 1579 | 0 | miR-98        | 26902 | 6701 | 0   | miR-98        | 10180 | 5363 | 0 |
| miR-98        | 5275  | 1605 | 0 | miR-98        | 25584 | 6576 | 0   | miR-98        | 10516 | 5559 | 0 |
| miR-98        | 5514  | 1600 | 0 | miR-98        | 29251 | 7138 | 0   | miR-98        | 11686 | 5717 | 0 |
| miR-99a       | 9087  | 2590 | 0 | miR-99a       | 10606 | 6105 | 0   | miR-99a       | 15816 | 5548 | 0 |
| miR-99a       | 8003  | 2599 | 0 | miR-99a       | 12138 | 6897 | 0   | miR-99a       | 20105 | 5745 | 0 |
| miR-99a       | 8548  | 2535 | 0 | miR-99a       | 8876  | 5667 | 0   | miR-99a       | 17731 | 5427 | 0 |
| miR-99b       | 10057 | 2267 | 0 | miR-99b       | 15380 | 7122 | 0   | miR-99b       | 32865 | 6491 | 0 |
| miR-99b       | 9979  | 2179 | 0 | miR-99b       | 16014 | 7398 | 0   | miR-99b       | 37818 | 6681 | 0 |
| miR-99b       | 9943  | 2208 | 0 | miR-99b       | 15868 | 7234 | 0   | miR-99b       | 33287 | 6400 | 0 |
| PsA-NAD-dehyd | 3528  | 2699 | 0 | PsA-NAD-dehyd | 11990 | 7451 | 0   | PsA-NAD-dehyd | 12022 | 6681 | 0 |
| PsA-NAD-dehyd | 3690  | 2783 | 0 | PsA-NAD-dehyd | 11180 | 7033 | 0   | PsA-NAD-dehyd | 12302 | 6442 | 0 |
| PsA-NAD-dehyd | 3461  | 2685 | 0 | PsA-NAD-dehyd | 11795 | 7252 | 0   | PsA-NAD-dehyd | 12922 | 6538 | 0 |
